# Supplementary material for: Endogenous testosterone level and testosterone supplementation therapy in chronic obstructive pulmonary disease (COPD): a systematic review and meta-analysis
Source: PubMed Central journal article supplement — BMJ Open. 2013 Aug 9;3(8):e003127. doi: 10.1136/bmjopen-2013-003127 (PMC3740247; doi:10.1136/bmjopen-2013-003127), 2013-08-09
Supplement: bmjopen-2013-003127.draft_revisions.pdf [file bmjopen-2013-003127.draft_revisions.pdf]

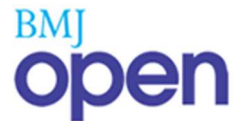

**Endogenous testosterone level and testosterone supplementation therapy in chronic obstructive pulmonary disease (COPD): a systematic review and meta-analysis**

|                                 |                                                                                                                                                                                                                                                                                                     |
|---------------------------------|-----------------------------------------------------------------------------------------------------------------------------------------------------------------------------------------------------------------------------------------------------------------------------------------------------|
| Journal:                        | <i>BMJ Open</i>                                                                                                                                                                                                                                                                                     |
| Manuscript ID:                  | bmjopen-2013-003127                                                                                                                                                                                                                                                                                 |
| Article Type:                   | Research                                                                                                                                                                                                                                                                                            |
| Date Submitted by the Author:   | 26-Apr-2013                                                                                                                                                                                                                                                                                         |
| Complete List of Authors:       | Atlantis, Evan; University of Western Sydney, Family and Community Health Research Group School of Nursing and Midwifery<br>Fahey, Paul<br>Cochrane, Belinda<br>Wittert, Gary<br>Smith, Sheree; University of Western Sydney, Family and Community Health Research, School of Nursing and Midwifery |
| <b>Primary Subject Heading</b>: | Respiratory medicine                                                                                                                                                                                                                                                                                |
| Secondary Subject Heading:      | Evidence based practice                                                                                                                                                                                                                                                                             |
| Keywords:                       | Sex steroids & HRT < DIABETES & ENDOCRINOLOGY, Thoracic medicine < INTERNAL MEDICINE, Diabetes & endocrinology < INTERNAL MEDICINE, Chronic airways disease < THORACIC MEDICINE, EPIDEMIOLOGY                                                                                                       |
|                                 |                                                                                                                                                                                                                                                                                                     |

SCHOLARONE™  
Manuscripts

Only

1  
2  
3 Article title: Endogenous testosterone level and testosterone supplementation therapy in  
4  
5 chronic obstructive pulmonary disease (COPD): a systematic review and meta-analysis  
6  
7  
8  
9

10 <sup>1</sup>Evan Atlantis, PhD; e-mail: [e.atlantis@uws.edu.au](mailto:e.atlantis@uws.edu.au)

11 <sup>2</sup>Paul Fahey, MMedStat; e-mail: [p.fahey@uws.edu.au](mailto:p.fahey@uws.edu.au)

12 <sup>1,3,4</sup>Belinda Cochrane, MD; e-mail: [belindacochrane@bigpond.com](mailto:belindacochrane@bigpond.com)

13 <sup>5</sup>Gary Wittert, MD; e-mail: [gary.wittert@adelaide.edu.au](mailto:gary.wittert@adelaide.edu.au)

14 <sup>1,6</sup>Sheree Smith, PhD; e-mail: [sheree.smith@uws.edu.au](mailto:sheree.smith@uws.edu.au)

15  
16  
17  
18  
19  
20  
21  
22  
23 <sup>1</sup>School of Nursing and Midwifery, University of Western Sydney, Campbelltown Campus,  
24  
25 New South Wales, Australia

26  
27  
28 <sup>2</sup>School of Science and Health, University of Western Sydney, Campbelltown Campus, New  
29  
30 South Wales, Australia

31  
32  
33 <sup>3</sup>School of Medicine, University of Western Sydney, Campbelltown Campus, New South  
34  
35 Wales, Australia

36  
37 <sup>4</sup>Staff Specialist Respiratory and Sleep Physician, Campbelltown Hospital, New South  
38  
39 Wales, Australia

40  
41 <sup>5</sup>School of Medicine, University of Adelaide, Adelaide, South Australia, Australia

42  
43 <sup>6</sup>Centre for Pharmacology and Therapeutics, Division of Experimental Medicine, Imperial  
44  
45 College, South Kensington, London

46  
47  
48 This research was performed at the University of Western Sydney.

49  
50  
51  
52  
53 Keywords: Gonadal steroid hormones; pulmonary disease, chronic obstructive; lung diseases,  
54  
55 obstructive; exercise therapy; exercise test; quality of life  
56  
57  
58  
59  
60

1  
2  
3 Text word count: 3520  
4

5 Abstract word count: 300  
6  
7  
8  
9

10 For submission to: BMJ open  
11

12 Date: 26 April 2013  
13

14 Corresponding Author: Evan Atlantis, PhD  
15

16 Senior Research Fellow  
17

18 Family and Community Health Research Group  
19

20 School of Nursing and Midwifery | University of Western  
21 Sydney  
22

23 Building 17, Room 17.1.14, Campbelltown Campus,  
24

25 Locked Bag 1797, Penrith NSW 2751 AUSTRALIA  
26

27 Phone: + 61 2 4620 3263  
28

29 Fax: + 61 2 4620 3199  
30

31 Email: [e.atlantis@uws.edu.au](mailto:e.atlantis@uws.edu.au)  
32  
33  
34  
35  
36  
37  
38  
39  
40  
41  
42  
43  
44  
45  
46  
47  
48  
49  
50  
51  
52  
53  
54  
55  
56  
57  
58  
59  
60

**ABSTRACT**

**Objective:** Low testosterone level may be a reversible risk factor for functional disability and deterioration in patients with COPD. We sought to systematically assess endogenous testosterone levels and effect of testosterone therapy on exercise capacity and health-related quality of life (HRQoL) outcomes in COPD patients, to inform guidelines and practice.

**Design:** Systematic review and meta-analysis.

**Data sources:** We searched PubMed, Scopus, Cochrane Library, Cinahl, Health Source Nursing, and PsychINFO and reference lists of retrieved articles published before May 2012.

**Inclusion criteria:** Observational studies on endogenous testosterone levels in people with chronic lung disease compared with controls, or randomised controlled trials (RCTs) on testosterone therapy for exercise capacity and/or HRQoL outcomes in COPD patients were eligible.

**Data extraction and analysis:** Data on the mean difference in endogenous total testosterone (TT) values, and the mean difference in exercise capacity and HRQoL values were extracted and pooled using random effects meta-analysis.

**Results:** Nine observational studies in 2918 men with COPD reported consistently lower levels of total testosterone (TT) compared with controls (weighted mean difference was -3.21nmol/L [95% CI: -5.18, -1.23]). Six RCTs in 287 participants yielded five studies on peak muscle strength and peak cardiorespiratory fitness (CRF) outcomes (peak oxygen uptake [VO<sub>2</sub>] and workload), and three studies on HRQoL outcomes. Testosterone therapies significantly improved peak muscle strength (standardised mean difference [SMD] was 0.31 [95% CI: 0.05, 0.56]) and peak workload (SMD was 0.27 [95% CI: 0.01, 0.52]) compared with control conditions (all but one used placebo), but not peak VO<sub>2</sub> (SMD was 0.21 [95% CI: -0.15, 0.56]) or HRQoL (SMD was -0.03 [95% CI: -0.32, 0.25]).

1  
2  
3 **Conclusions:** Men with COPD have clinically relevant lower than normal TT levels.  
4  
5 Insufficient evidence from short-term studies in predominately male COPD patients suggest  
6  
7 that testosterone therapy improves exercise capacity outcomes, namely peak muscle strength  
8  
9 and peak workload.  
10  
11  
12  
13  
14  
15  
16  
17  
18  
19  
20  
21  
22  
23  
24  
25  
26  
27  
28  
29  
30  
31  
32  
33  
34  
35  
36  
37  
38  
39  
40  
41  
42  
43  
44  
45  
46  
47  
48  
49  
50  
51  
52  
53  
54  
55  
56  
57  
58  
59  
60

## INTRODUCTION

Chronic obstructive pulmonary disease (COPD) is currently ranked the fifth leading cause of global disability (health loss)[1]. Health status or health-related quality of life (HRQoL) is a clinically important measurement of disability among patients with COPD for prognostic studies and trials[2-4]. Exercise capacity, one of the main determinants of HRQoL, is significantly impaired in COPD patients[3, 5]. Dyspnea and fatigue due to skeletal muscle dysfunction, among other physiological abnormalities, are cardinal symptoms that limit exercise capacity in COPD patients[6]. This is partly due to decreases in muscle strength and mass (often called “cachexia”), since they are characteristic features of skeletal muscle dysfunction contributing to exercise intolerance and consequential deterioration in HRQoL[5, 6]. Conversely, pulmonary rehabilitation including exercise (namely resistance training) leads to clinically relevant improvements in muscle strength and HRQoL[7, 8], indicating that skeletal muscle dysfunction should be a primary therapeutic target for intervention in patients with COPD.

Since testosterone level has been shown to be positively associated with muscle strength and cardiorespiratory fitness (CRF) accounting for physical activity and muscle mass[9, 10], a low testosterone level may be an independent risk factor for functional disability and deterioration in COPD. For example, levels of testosterone and other androgenic hormones were decreased in both male and female COPD patients compared with controls in a few studies[11-13]. Potential mechanisms for this endocrine dysfunction likely involve hypoxaemia, hypercapnia, systemic inflammation and use of glucocorticoids[14].

Thus, it is important to reliably establish whether the mean endogenous testosterone level is decreased in patients with COPD, because this condition is reversible with testosterone supplementation therapy. Indeed, a small but promising body of randomized controlled trial (RCT) evidence suggests that testosterone therapy improves exercise capacity and HRQoL

1  
2  
3 without increasing serious adverse events[15-17]. While it is difficult to explain this apparent  
4 therapeutic benefit, increased cardiac output[18], haemoglobin and haematocrit[19],  
5 baroreflex sensitivity[20], and exercise tolerance due to improvements in peak oxygen uptake  
6 (peak VO<sub>2</sub>) and muscle strength[20] are all plausible mechanisms.  
7  
8  
9

10  
11 Our initial analysis of the available published literature indicates an absence of a  
12 systematic review of relevant studies on endogenous testosterone levels and testosterone  
13 therapy in patients with COPD. We therefore sought to systematically review previous  
14 research to assess the mean endogenous testosterone level in people with chronic lung disease  
15 compared with controls, and the effects of testosterone therapies on exercise capacity and  
16 HRQoL outcomes in COPD patients, to inform guidelines and practice.  
17  
18  
19  
20  
21  
22  
23  
24  
25  
26

## 27 **METHODS**

### 28 **Search strategy**

29  
30 We searched PubMed, Scopus, Cochrane Library, Cinahl, Health Source Nursing, and  
31 PsychINFO electronic databases for articles published before May 2012. Search syntaxes  
32 were developed in consultation with an experienced university research librarian taking into  
33 account a broad range of terms and phrases used in definitions of testosterone and COPD  
34 (full electronic search strategies for PubMed, Scopus and Cochrane Library databases in  
35 appendix pages 1, 2). Reference lists of potentially eligible articles were searched by hand to  
36 identify additional studies missed by our search strategy.  
37  
38  
39  
40  
41  
42  
43  
44  
45  
46  
47  
48  
49

### 50 **Study selection**

51  
52 One reviewer (EA) identified potentially relevant studies for inclusion by screening titles  
53 and/or abstracts of all citations identified with our database searches. A second screening was  
54 performed on the full text of these articles. Observational studies in adult populations that  
55  
56  
57  
58  
59  
60

1  
2  
3 reported endogenous testosterone levels in men and/or women (separately) with chronic lung  
4 disease (cases) compared with controls, or RCTs that reported the effects of testosterone  
5 treatment on exercise capacity and HRQoL outcomes in COPD patients were eligible. There  
6  
7  
8 were no language restrictions for articles.  
9  
10

### 11 12 13 14 **Data extraction**

15  
16 Data extraction and quality assessment of included studies were performed and/or verified  
17 independently by three reviewers (EA, BC and SS). Discrepancies were resolved through  
18 discussion. Authors of relevant studies were contacted, where possible, for data that could not  
19  
20  
21  
22  
23 be extracted from the published articles.  
24  
25  
26

### 27 28 **Quality assessment**

29  
30 For methodology and quality assessment, quality checklists were developed to identify  
31 potential sources of bias (tables in appendix pages 3, 4). Quality items for observational  
32 studies reviewed were (each worth 1 numerical point): (1) COPD or chronic lung disease was  
33 reported to have been clinically diagnosed or categorized according to the WHO International  
34 Statistical Classification of Diseases and Related Health Problems (ICD) system, (2)  
35 endogenous testosterone level was measured by radioimmunoassay (RIA) or liquid  
36 chromatography-tandem mass spectrometry (LC-MS/MS), (3) the study population was  
37 representative of the clinical setting or community (i.e., demographic characteristics of cases  
38 and hospital controls were typical and community cases or controls were randomly selected),  
39 and (4) there was adequate adjustment or exclusion or matching for covariates known to be  
40 associated with COPD and hypogonadism in men (each worth 0.2 numerical point): (a) age,  
41 (b) socio-economic or partner status, (c) central or general obesity, (d) smoking status, (e)  
42 alcohol intake, (f) physical activity, (g) depression or anxiety (or medications), (h) metabolic  
43  
44  
45  
46  
47  
48  
49  
50  
51  
52  
53  
54  
55  
56  
57  
58  
59  
60



1  
2  
3 syndrome or cardiovascular disease (or medications), (i) systemic inflammation (or  
4  
5 glucocorticoids), and (j) sleep apnea (or treatments).  
6

7  
8 Quality items for RCT studies reviewed were (each worth 1.0 numerical point): (1) study  
9  
10 eligibility criteria were adequately described, (2) randomization methodology was adequate  
11  
12 (i.e., evidence suggesting “random” method was used to generate and implement random  
13  
14 allocation sequence), (3) allocation concealment was adequate (i.e., evidence to suggest that a  
15  
16 robust method was used for concealing the sequence of treatment allocation (e.g.,  
17  
18 independent IT or telephone service or sealed opaque envelopes only opened in front of the  
19  
20 participant), (4) between-group prognostic indicators were balanced (i.e., evidence showing  
21  
22 that groups were similar at the outset for these prognostic indicators), (5) care providers were  
23  
24 blinded to treatment allocation, (6) between-group drop-out rates were balanced, (7) intention  
25  
26 to treat analysis was included, and (8) adverse events were reported.  
27  
28

29  
30 Our quality checklist scales were designed based on criteria for assessment of  
31  
32 observational studies[21] and RCTs[21, 22] and allowed summed scores to range from 0 to 5  
33  
34 points and 0 to 8 points, respectively, reflecting lowest to highest quality. Studies were  
35  
36 considered ‘better quality’ if they received a score of 3 or higher for observational studies and  
37  
38 of 5 or higher for RCTs, since that meant that they had most of our quality items.  
39  
40

#### 41 42 43 **Primary outcomes**

44  
45 The primary outcomes were the mean difference in endogenous total testosterone (TT)  
46  
47 values between the case and control groups for observational studies (the most frequently  
48  
49 reported testosterone outcome in relevant studies), and the mean difference in exercise  
50  
51 capacity and HRQoL values after intervention (post-treatment) between the treatment and  
52  
53 control groups for RCTs. Where necessary for observational studies, we estimated the mean  
54  
55 and variance from the median, range, and sample size[23]. Where necessary for RCTs, the  
56  
57  
58  
59  
60

1  
2  
3 post-treatment means were derived from the within group changes and the control group  
4  
5 standard deviation carried forward from the baseline values[24]. Exercise capacity outcomes  
6  
7 included any assessment of CRF and peripheral skeletal muscle strength. Where multiple  
8  
9 CRF outcomes were reported, first we chose peak VO2 measures, and then prioritized peak  
10  
11 workload (power output) laboratory assessments of CRF over field tests. Where multiple  
12  
13 muscle strength outcomes were reported, we prioritized peak isometric over peak dynamic  
14  
15 measures; and knee extension over other joint movements. HRQoL outcomes included any  
16  
17 patient-reported assessment of health status or functional disability. Where multiple HRQoL  
18  
19 outcomes/scales were reported, first we chose summed score scales, and then prioritized  
20  
21 subscales that measure “fatigue” symptoms, and the most frequently reported HRQoL  
22  
23 outcome in the other studies reviewed.  
24  
25  
26  
27  
28

### 29 **Data synthesis**

30  
31  
32 Three reviewers (EA, BC and SS) independently collated and/or verified extracted data to  
33  
34 present a descriptive synthesis of important study characteristics and a quantitative synthesis  
35  
36 of effect estimates.  
37  
38  
39  
40

### 41 **Secondary outcomes**

42  
43 The secondary outcomes were data about adverse events reported in the RCTs for a  
44  
45 descriptive synthesis.  
46  
47  
48  
49

### 50 **Statistical methods**

51  
52 We pooled and weighted studies first using random effects meta-analysis models, and  
53  
54 second using fixed effects models for verification[25]. Where necessary, we standardised  
55  
56 laboratory values for endogenous TT levels between observational studies using the  
57  
58  
59  
60

1  
2  
3 International System of Units (SI Units), expressed in nanomoles per litre (nmol/L). These  
4  
5 studies were then pooled to estimate the weighted mean difference (WMD), including the  
6  
7 95% confidence interval (95% CI), between cases and controls. Median and mean values  
8  
9 were assumed to be equivalent estimates of central tendency for meta-analysis.  
10

11  
12 In examining the effects of testosterone treatment on exercise capacity and HRQoL  
13  
14 outcomes, the standardised mean difference (SMD) from each RCT were pooled to produce  
15  
16 an overall estimate of effect, and associated 95%CI, between treatment and control groups.  
17  
18 For each meta-analysis model, the degree of heterogeneity in SMDs was assessed by visual  
19  
20 inspection, the *I*-squared statistic (*I*-squared values > 40 %) and the  $\chi^2$ -test of goodness of  
21  
22 fit[26]. Where evidence of heterogeneity was observed, we checked data extracted from  
23  
24 individual outlier studies, qualitatively investigated reasons for their different results, and  
25  
26 explored the effects of study exclusion in sensitivity analyses.  
27  
28

29  
30 We also used sensitivity analysis to investigate the robustness of the meta-analyses  
31  
32 models. We variously excluded RCTs in men and women, placebo only (rather than placebo  
33  
34 with exercise) controlled trials, longer duration trials ( $\geq 12$  weeks), and studies of lower  
35  
36 quality (score < 3.0 for observational studies; score < 5.0 for RCTs). And we repeated the  
37  
38 meta-analysis models using different CRF outcomes. Publication bias, which reflects the  
39  
40 tendency for smaller studies to be published in the literature only when findings are positive,  
41  
42 was assessed visually using funnel plots[27]. All calculations were performed in Stata version  
43  
44 12 (StataCorp, College Station, TX, USA) using the 'metan'and 'metafunnel' commands. A  
45  
46 two-tailed *P*-value < 0.05 was considered statistically significant throughout the analyses.  
47  
48  
49  
50

## 51 52 RESULTS

53  
54 Figure 1 presents a flowchart summarising identification of potentially relevant studies,  
55  
56 and those included and excluded (appendix page 8). Our search strategy identified 906  
57  
58  
59  
60

1  
2  
3 citations after duplicates were removed. Of these, 865 citations were excluded after the first  
4  
5 screening of titles and/or abstracts for inclusion and exclusion criteria, leaving 41 citations for  
6  
7 a second full text screening. Hand searching the reference lists of these articles identified two  
8  
9 additional potentially relevant citations. After further assessment of these 43 citations, 28  
10  
11 were excluded for reasons listed in figure 1, leaving 15 for final inclusion in the systematic  
12  
13 review. Most studies were excluded for inadequate predictor or outcome variables, or not  
14  
15 having a control group (list of excluded citations; appendix pages 5-7).  
16  
17  
18  
19  
20

### 21 **Descriptive data synthesis**

22  
23 Table 1 presents study characteristics of nine observational studies included for review,  
24  
25 which were published between 1981 and 2011. Studies were conducted in Scotland[28, 29],  
26  
27 Sweden[30], the United States[31], Taiwan[32], Greece[12], Turkey[13], Norway[33] and  
28  
29 Belgium[34]. The degree of severity of airflow limitation in COPD cases ranged from mild to  
30  
31 very severe, assessed according to the Global Initiative for Chronic Obstructive Lung Disease  
32  
33 (GOLD) criteria[35] in four studies[12, 13, 32, 34], and by various spirometry criteria in  
34  
35 four[28, 29, 31, 33] out of the five remaining studies. Control participants were recruited  
36  
37 from primary care settings in six studies[12, 28, 29, 31, 32, 34]. The sample sizes ranged  
38  
39 from 16 to 213, resulting in a total of 2918 participants across studies. Mean age of the  
40  
41 samples ranged from 50 to 71 years. All of the observational studies were conducted in men.  
42  
43 Mean quality scores ranged from 2.2 to 4.0, and four studies received a score of 3.0 or  
44  
45 higher[12, 13, 31, 33].  
46  
47  
48  
49  
50  
51  
52  
53  
54  
55  
56  
57  
58  
59  
60

<< Table 1 >>

1  
2  
3 Table 2 presents study characteristics of six RCTs included for review, which were  
4 published between 2003 and 2011. Studies were conducted in the United States[36], The  
5 Netherlands[37], Brazil[38], France[16], Canada[39] and Norway[40]. Major inclusion  
6 criteria were stable COPD or chronic respiratory failure in all studies, various spirometry  
7 criteria in all but one study[16], low TT in only one study[36], and low body mass index in  
8 only two studies[16, 38]. Major exclusion criteria were a range of chronic conditions in all  
9 studies, prostatic conditions in four studies[16, 36, 38, 39], and elevated haemoglobin in one  
10 study[36]. The sample sizes ranged from 16 to 122, resulting in a total of 287 participants  
11 across studies. Mean age of the samples ranged from 66 to 69 years. All but two studies[16,  
12 39] were conducted in men only. Baseline mean TT levels ranged from 9.6 to 21.6nmol/L for  
13 men, and 0.42 to 0.45nmol/L for women as reported in one study[16]. Testosterone therapies  
14 used were oral testosterone undecanoate in one study[16], oral stanozolol after a baseline  
15 intramuscular injection of testosterone in another study[38], and intramuscular injections  
16 (testosterone enanthate[36, 40] and nandrolone decanoate[37]) in all remaining studies. Four  
17 studies investigated the combined effects of testosterone therapy with resistance training  
18 (RT)[36] or pulmonary rehabilitation (PR)[16, 38, 39]. All but one study[16] used placebo  
19 control conditions. Trial durations ranged from eight to 27 weeks. Primary outcomes were  
20 peak muscle strength in five studies (from four citations[16, 36, 37, 39]), peak VO<sub>2</sub> in five  
21 studies (from four citations[36-39]), peak workload in five studies (from four citations[16,  
22 36, 37, 39]), six minute walking test (6MWT) in four studies[16, 38-40], and HRQoL in three  
23 studies[16, 37, 39]. Mean quality scores ranged from 4.5 to 6.0, and all but one study[39]  
24 received a score of 5.0 or higher.  
25  
26  
27  
28  
29  
30  
31  
32  
33  
34  
35  
36  
37  
38  
39  
40  
41  
42  
43  
44  
45  
46  
47  
48  
49  
50

51 << Table 2 >>  
52  
53  
54  
55  
56  
57  
58  
59  
60

## Quantitative data synthesis

### Effect of COPD exposure on endogenous TT level

Figure 2 presents the WMD in endogenous TT level between the case and control groups for observational studies (appendix page 9). Men with COPD had significantly lower levels of TT compared with controls (pooled WMD was -3.21nmol/L [-5.18, -1.23]). There was a high degree heterogeneity between studies ( $I$ -squared=81.9%,  $P$ <0.001) that was mostly a result of variation in degree of deference rather than an unfavourable direction towards the null. The sensitivity analyses presented in table 3 shows that the pooled WMD was substantially changed after exclusion of lower quality studies (increased to -3.68 [-7.00, -0.36]) and one large sample size study[33] (increased to -3.56 [-5.63, -1.49]), and in a model using unadjusted rather than adjusted values in one study[33] (decreased to -2.95 [-4.63, -1.27]). In addition, a funnel plot was produced and showed only slight evidence of publication bias, since the WMD in TT was small (-0.60[32] and -1.10nmol/L[33]) for two of the largest studies (figure 3; appendix page 10).

<< Table 3 >>

### Effect of testosterone therapy on exercise capacity and HRQoL outcomes

Figure 4 presents the SMD in peak muscle strength outcomes after testosterone therapy between the treatment and control groups for RCTs (appendix page 11). Testosterone therapies significantly improved standardised peak muscle strength outcomes compared with control conditions (pooled SMD was 0.31 [0.05, 0.56]), and there was little evidence of statistical heterogeneity between studies ( $I$ -squared=0.0%,  $P$ =0.839). The sensitivity analyses presented in table 4 shows that the pooled SMD was similar after exclusion of one lower quality study [39] (-0.31 [0.04, 0.57]), but was substantially changed after exclusion of two

1  
2  
3 placebo only controlled studies (no longer statistically significant 0.30 [-0.01, 0.62]), and the  
4  
5 two studies in men and women that were also the two longer duration studies[16, 39]  
6  
7 (decreased to 0.21 [-0.18, 0.60]). In addition, a funnel plot was produced and showed only  
8  
9 slight evidence of publication bias, since the SMD in peak muscle strength outcomes was  
10  
11 consistent in all but one treatment arm in one study[36] (figure 5; appendix page 12).  
12  
13

14  
15  
16 << Table 4 >>  
17  
18  
19

20  
21 Figure 6 presents the SMD in peak VO<sub>2</sub> outcomes after testosterone therapy between the  
22  
23 treatment and control groups for RCTs (appendix page 13). Testosterone therapies  
24  
25 consistently failed to show significant improvements in standardised peak VO<sub>2</sub> outcomes  
26  
27 compared with control conditions (pooled SMD was 0.21 [-0.15, 0.56]; *I*-squared=4.8%,  
28  
29 *P*=0.379). The sensitivity analyses presented in table 5 shows that this null effect was similar  
30  
31 after exclusion of one lower quality study[39] (0.13 [-0.27, 0.54]), two placebo only  
32  
33 controlled studies (0.03 [-0.60, 0.66]), one study in men and women[39] (0.13 [-0.27, 0.54]),  
34  
35 and two longer duration studies[38, 39] (0.27 [-0.12, 0.67]), and in the model using 6MWT  
36  
37 outcomes (0.10 [-0.34, 0.53]). Conversely, testosterone therapies significantly improved CRF  
38  
39 in the model using peak workload rather than peak VO<sub>2</sub> outcomes (pooled SMD was 0.27  
40  
41 [0.01, 0.52]), and there was little evidence of statistical heterogeneity between studies (*I*-  
42  
43 squared=0.0%, *P*=0.741).  
44  
45  
46  
47  
48  
49

50 << Table 5 >>  
51  
52  
53

54 Figure 7 presents the SMD in peak HRQoL outcomes after testosterone therapy between  
55  
56 the treatment and control groups for RCTs (appendix page 14). Testosterone therapies  
57  
58  
59  
60

1  
2  
3 consistently failed to show better standardised HRQoL outcomes compared with control  
4  
5 conditions (pooled SMD was -0.03 [-0.32, 0.25]; *I*-squared=0.0%, *P*=0.934). The sensitivity  
6  
7 analyses showed that this null effect was comparable in the fixed effect model (-0.03 [-0.32,  
8  
9 0.25]) and after exclusion of one lower quality study[39] (-0.04 [-0.34, 0.25]).  
10  
11

## 12 13 14 Adverse events

15  
16 Two RCTs showed that testosterone therapy was associated with more serious adverse  
17  
18 events compared with the control group. One study reported an increased number of  
19  
20 exacerbations during short-term, but not long-term, follow-up[16], and another study reported  
21  
22 that two of three COPD patients with respiratory failure in the treatment group had died[37].  
23  
24 Conversely, one study reported that more patients died of respiratory failure in the control  
25  
26 group[38]. Four studies showed that testosterone therapies decreased gonadotrophin levels  
27  
28 compared with controls, as can be expected[16, 36, 38, 40]. Compared with controls,  
29  
30 testosterone therapy was associated with a decrease in sex hormone-binding globulin level in  
31  
32 two studies[16, 40], and a decrease in oestradiol level in men only in another study[16].  
33  
34 Finally, few studies showed that testosterone therapy was associated with relative increases in  
35  
36 haemoglobin or haematocrit[16, 36, 37]; creatinine, aspartate aminotransferase and lactate  
37  
38 dehydrogenase values[37].  
39  
40  
41  
42  
43  
44

## 45 **DISCUSSION**

### 46 47 **Summary of evidence**

48  
49 We have established that men with COPD have significantly lower levels of endogenous  
50  
51 TT compared with controls (weighted mean difference was -3.21nmol/L [-5.18, -1.23]). The  
52  
53 size of the mean difference in TT level, which ranks men with COPD in the second quartile  
54  
55 (below average) compared with age-matched population norms[9], is likely to be clinically  
56  
57  
58  
59  
60



1  
2  
3 relevant. For instance, comparable or greater differences in TT levels between cases and  
4  
5 controls have been reported in studies on risk of type 2 diabetes (WMD was -2.66nmol/L [-  
6  
7 3.45, -1.86])[41], metabolic syndrome (WMD was -2.64nmol/L [-2.95, -2.32])[42], and  
8  
9 clinically significant depression (median difference was -1.21nmol/L,  $P<0.001$  for Mann-  
10  
11 Whitney test)[43]. These comorbidities have been shown to adversely affect COPD  
12  
13 prognosis[44-46], and would further complicate COPD management. As the effect of COPD  
14  
15 exposure on TT level increased in size after exclusion of lower quality studies and one large  
16  
17 sample size study, future higher quality studies will likely strengthen rather than weaken this  
18  
19 evidence base. Collectively, our results and the existing literature indicate that testosterone  
20  
21 deficiency should be considered in men with COPD.  
22  
23

24  
25 Based on limited short-term RCT evidence in predominately male COPD patients, our  
26  
27 results suggest that testosterone therapy significantly improves several exercise capacity  
28  
29 outcomes. The size of the effect of testosterone therapy that can be expected in practice is  
30  
31 small to moderate, but comparable to exercise or pulmonary rehabilitation therapies alone[7,  
32  
33 8]. The effect of testosterone therapy on standardised muscle strength outcomes remained  
34  
35 robust after exclusion of one lower quality study, but weakened after exclusion of two  
36  
37 placebo only studies. This supports the hypothesis that testosterone therapy with exercise is  
38  
39 more effective than testosterone therapy alone for functional improvements[47]. In addition,  
40  
41 our results suggest that the mechanism for improvement in CRF assessed by peak workload is  
42  
43 likely explained by better exercise tolerance due to testosterone-induced increases in muscle  
44  
45 strength rather than changes in VO<sub>2</sub>.  
46  
47  
48  
49  
50

## 51 52 **Limitations**

53  
54 Several limitations require careful consideration. Since only a small number of studies  
55  
56 conducted in specific populations were included, the findings of this review may not be  
57  
58  
59  
60

1  
2  
3 relevant to other countries and key groups, requiring further research. In particular, most of  
4  
5 the RCTs were conducted in COPD patients without cardiovascular disease and/or diabetes or  
6  
7 endocrine disease, which are highly prevalent in this population group[45]. Second, because  
8  
9 only a few RCTs targeted COPD patients who would have theoretically benefited most from  
10  
11 testosterone therapy such as those with low testosterone or body weight[16, 36, 38], our  
12  
13 estimated effect size for improvement in standardised exercise capacity may have been  
14  
15 underestimated. Finally, reviewer-level limitations include incomplete retrieval of  
16  
17 information for several of the 28 citations excluded, and the existence of other relevant  
18  
19 studies not identified with our search strategy resulting in selection bias. However, the results  
20  
21 and conclusions reported in most of the excluded studies were in line with those reported  
22  
23 here, selection bias was unlikely.  
24  
25  
26

27  
28 Nevertheless, our systematic analysis of the existing literature revealed that there is an  
29  
30 absence of sufficient RCT evidence to draw firm conclusions about the long-term benefits  
31  
32 and risks of testosterone therapies for exercise capacity and HRQoL outcomes in male or  
33  
34 female COPD patients, or about the pharmacological dosing for specific testosterone  
35  
36 therapies needed for effectiveness. Reliable information on the efficacy and safety, as well as  
37  
38 cost-effectiveness, of specific testosterone therapies is required to inform clinical practice  
39  
40 guidelines for COPD. In addition, future high quality epidemiological research is needed to  
41  
42 determine which subgroups of COPD patients are most vulnerable to testosterone deficiency,  
43  
44 and to reliably establish whether women with COPD likewise present with significantly  
45  
46 lower levels of TT than controls.  
47  
48  
49

## 50 51 52 **Conclusions**

53  
54 Men with COPD have clinically relevant lower than normal endogenous TT levels, and we  
55  
56 believe that our meta-analytic results are sufficiently reliable to recommend that clinicians  
57  
58  
59  
60

1  
2  
3 should consider testosterone deficiency in these patients. Although our results also suggest  
4  
5 that testosterone therapy improves several exercise capacity outcomes, there is an absence of  
6  
7 sufficient RCT evidence to draw firm conclusions about the long-term benefits and risks of  
8  
9 testosterone therapy for exercise capacity and HRQoL outcomes in male or female COPD  
10  
11 patients.  
12  
13  
14  
15  
16  
17  
18  
19  
20  
21  
22  
23  
24  
25  
26  
27  
28  
29  
30  
31  
32  
33  
34  
35  
36  
37  
38  
39  
40  
41  
42  
43  
44  
45  
46  
47  
48  
49  
50  
51  
52  
53  
54  
55  
56  
57  
58  
59  
60

## ACKNOWLEDGMENTS

Authorship order is according to percentage contribution. EA is guarantor of the paper, taking responsibility for the integrity of the work as a whole, from inception to published article. EA conceived and designed the review, identified studies for inclusion, extracted and interpreted data, and drafted the article. PF analysed and interpreted data, and revised the article. BC and SS extracted and interpreted data, and revised the article. GW interpreted data, and revised the article. All authors approved the final completed article. We are grateful to Mr Geoffrey Lattimore for his work on developing and conducting the electronic database searches.

## COMPETING INTERESTS

EA has entered financial agreements to speak at events for Eli Lilly Australia Pty Ltd (Lilly). BC has received speaking fees and/or conference support from GSK, Novartis and Boehringer Ingelheim. GW has received speaking fees and research support from Bayer; is on International and National advisory boards for and has received research support from Lilly; and has received consulting fees and research support from Lawley pharmaceuticals.

## REFERENCES

1. Vos T, Flaxman AD, Naghavi M, *et al.* Years lived with disability (YLDs) for 1160 sequelae of 289 diseases and injuries 1990-2010: a systematic analysis for the Global Burden of Disease Study 2010. *The Lancet.* 2012;380(9859):2163-96.
2. Cazzola M, MacNee W, Martinez FJ, *et al.* Outcomes for COPD pharmacological trials: from lung function to biomarkers. *Eur Respir J.* 2008 Feb;31(2):416-69.
3. Jones PW. Health status measurement in chronic obstructive pulmonary disease. *Thorax.* 2001 Nov;56(11):880-7.
4. Marin JM, Cote CG, Diaz O, *et al.* Prognostic assessment in COPD: health related quality of life and the BODE index. *Respir Med.* 2011 Jun;105(6):916-21.
5. Hamilton AL, Killian KJ, Summers E, *et al.* Muscle strength, symptom intensity, and exercise capacity in patients with cardiorespiratory disorders. *Am J Respir Crit Care Med.* 1995 Dec;152(6 Pt 1):2021-31.
6. Nici L, Donner C, Wouters E, *et al.* American Thoracic Society/European Respiratory Society statement on pulmonary rehabilitation. *Am J Respir Crit Care Med.* 2006 Jun 15;173(12):1390-413.
7. O'Shea SD, Taylor NF, Paratz JD. Progressive resistance exercise improves muscle strength and may improve elements of performance of daily activities for people with COPD: a systematic review. *Chest.* 2009 Nov;136(5):1269-83.
8. COPD Working Group. Pulmonary Rehabilitation for Patients With Chronic Pulmonary Disease (COPD): An Evidence-Based Analysis. Ontario Health Technology Assessment Series. 2012;12(6):1-75.

- 1  
2  
3 9. Atlantis E, Martin SA, Haren MT, *et al.* Demographic, physical and lifestyle factors  
4 associated with androgen status: the Florey Adelaide Male Ageing Study (FAMAS).  
5 Clin Endocrinol (Oxf). 2009 Aug;71(2):261-72.  
6  
7
- 8  
9  
10 10. Jankowska EA, Filippatos G, Ponikowska B, *et al.* Reduction in circulating  
11 testosterone relates to exercise capacity in men with chronic heart failure. J Card Fail.  
12 2009 Jun;15(5):442-50.  
13  
14
- 15  
16  
17 11. Ravaglia G, Forti P, Maioli F, *et al.* Dehydroepiandrosterone-sulfate serum levels and  
18 common age-related diseases: results from a cross-sectional Italian study of a general  
19 elderly population. Exp Gerontol. 2002 May;37(5):701-12.  
20  
21  
22
- 23  
24 12. Kaparianos A, Argyropoulou E, Efremidis G, *et al.* Sex hormone alterations and  
25 systemic inflammation in a group of male COPD smokers and their correlation with  
26 the +138 insA/delA endothelin-1 gene polymorphism. A case-control study. Eur Rev  
27 Med Pharmacol Sci. 2011 Oct;15(10):1149-57.  
28  
29  
30
- 31  
32  
33 13. Karadag F, Ozcan H, Karul AB, *et al.* Correlates of erectile dysfunction in moderate-  
34 to-severe chronic obstructive pulmonary disease patients. Respirology. 2007  
35 Mar;12(2):248-53.  
36  
37  
38
- 39  
40 14. Laghi F, Adiguzel N, Tobin MJ. Endocrinological derangements in COPD. European  
41 Respiratory Journal. 2009;34(4):975-96.  
42  
43
- 44  
45 15. Toma M, McAlister FA, Coglianese EE, *et al.* Testosterone supplementation in heart  
46 failure: a meta-analysis. Circ Heart Fail. 2012 May 1;5(3):315-21.  
47  
48
- 49  
50 16. Pison CM, Cano NJ, Cherion C, *et al.* Multimodal nutritional rehabilitation improves  
51 clinical outcomes of malnourished patients with chronic respiratory failure: a  
52 randomised controlled trial. Thorax. 2011 Nov;66(11):953-60.  
53  
54  
55  
56  
57  
58  
59  
60

17. Katznelson L, Robinson MW, Coyle CL, *et al.* Effects of modest testosterone supplementation and exercise for 12 weeks on body composition and quality of life in elderly men. *Eur J Endocrinol.* 2006 Dec;155(6):867-75.
18. Pugh PJ, Jones TH, Channer KS. Acute haemodynamic effects of testosterone in men with chronic heart failure. *Eur Heart J.* 2003 May;24(10):909-15.
19. Fernandez-Balsells MM, Murad MH, Lane M, *et al.* Clinical review 1: Adverse effects of testosterone therapy in adult men: a systematic review and meta-analysis. *J Clin Endocrinol Metab.* 2010 Jun;95(6):2560-75.
20. Caminiti G, Volterrani M, Iellamo F, *et al.* Effect of long-acting testosterone treatment on functional exercise capacity, skeletal muscle performance, insulin resistance, and baroreflex sensitivity in elderly patients with chronic heart failure a double-blind, placebo-controlled, randomized study. *J Am Coll Cardiol.* 2009 Sep 1;54(10):919-27.
21. CRD's guidance for undertaking reviews in health care. © Centre for Reviews and Dissemination University of York 2008 Published by CRD 2009.
22. Schulz KF, Altman DG, Moher D. CONSORT 2010 statement: updated guidelines for reporting parallel group randomised trials. *BMJ.* 2010;340:c332.
23. Hozo SP, Djulbegovic B, Hozo I. Estimating the mean and variance from the median, range, and the size of a sample. *BMC Med Res Methodol.* 2005;5:13.
24. Higgins JPT, Green S. *Cochrane Handbook for Systematic Reviews of Interventions* Version 5.1.0 [updated March 2011]. The Cochrane Collaboration, 2011 Available from [www.cochrane-handbook.org](http://www.cochrane-handbook.org) [serial on the Internet]. editors.
25. DerSimonian R, Laird N. Meta-analysis in clinical trials. *Control Clin Trials.* 1986 Sep;7(3):177-88.

- 1
  - 2
  - 3
  - 4
  - 5
  - 6
  - 7
  - 8
  - 9
  - 10
  - 11
  - 12
  - 13
  - 14
  - 15
  - 16
  - 17
  - 18
  - 19
  - 20
  - 21
  - 22
  - 23
  - 24
  - 25
  - 26
  - 27
  - 28
  - 29
  - 30
  - 31
  - 32
  - 33
  - 34
  - 35
  - 36
  - 37
  - 38
  - 39
  - 40
  - 41
  - 42
  - 43
  - 44
  - 45
  - 46
  - 47
  - 48
  - 49
  - 50
  - 51
  - 52
  - 53
  - 54
  - 55
  - 56
  - 57
  - 58
  - 59
  - 60
26. Higgins JP, Thompson SG. Quantifying heterogeneity in a meta-analysis. *Stat Med*. 2002 Jun 15;21(11):1539-58.
27. Egger M, Davey Smith G, Schneider M, *et al*. Bias in meta-analysis detected by a simple, graphical test. *BMJ*. 1997 Sep 13;315(7109):629-34.
28. Gow SM, Seth J, Beckett GJ. Thyroid function and endocrine abnormalities in elderly patients with severe chronic obstructive lung disease. *Thorax*. 1987;42(7):520-5.
29. Semple PD, Beastall GH, Watson WS, *et al*. Hypothalamic-pituitary dysfunction in respiratory hypoxia. *Thorax*. 1981 Aug;36(8):605-9.
30. Bratel T, Wennlund A, Carlstrom K. Impact of hypoxaemia on neuroendocrine function and catecholamine secretion in chronic obstructive pulmonary disease (COPD). Effects of long-term oxygen treatment. *Respir Med*. 2000 Dec;94(12):1221-8.
31. Iqbal F, Michaelson J, Thaler L, *et al*. Declining bone mass in men with chronic pulmonary disease. Contribution of glucocorticoid treatment, body mass index, and gonadal function. *Chest*. 1999;116(6):1616-24.
32. Hsu AH, Chen DY, Lee JJ. Serum testosterone levels in patients with chronic obstructive pulmonary disease. *Tzu Chi Medical Journal*. 2006;18(2):113-20+62.
33. Svartberg J, Schirmer H, Medbo A, *et al*. Reduced pulmonary function is associated with lower levels of endogenous total and free testosterone. The Tromso study. *Eur J Epidemiol*. 2007;22(2):107-12.
34. Van Vliet M, Spruit MA, Verleden G, *et al*. Hypogonadism, quadriceps weakness, and exercise intolerance in chronic obstructive pulmonary disease. *American Journal of Respiratory & Critical Care Medicine*. 2005;172(9):1105-11.



- 1  
2  
3 35. Global Initiative for Chronic Obstructive Lung Disease. Global Strategy for the  
4  
5 Diagnosis, Management, and Prevention of Chronic Obstructive Pulmonary Disease  
6  
7 (Revised 2011). 2011.  
8
- 9  
10 36. Casaburi R, Bhasin S, Cosentino L, *et al*. Effects of testosterone and resistance  
11  
12 training in men with chronic obstructive pulmonary disease. *Am J Respir Crit Care*  
13  
14 *Med*. 2004 Oct 15;170(8):870-8.  
15
- 16  
17 37. Creutzberg EC, Wouters EF, Mostert R, *et al*. A role for anabolic steroids in the  
18  
19 rehabilitation of patients with COPD? A double-blind, placebo-controlled,  
20  
21 randomized trial. *Chest*. 2003 Nov;124(5):1733-42.  
22
- 23  
24 38. Ferreira IM, Verreschi IT, Nery LE, *et al*. The influence of 6 months of oral anabolic  
25  
26 steroids on body mass and respiratory muscles in undernourished COPD patients.  
27  
28 *Chest*. 1998 Jul;114(1):19-28.  
29
- 30  
31 39. Sharma S, Arneja A, McLean L, *et al*. Anabolic steroids in COPD: a review and  
32  
33 preliminary results of a randomized trial. *Chron Respir Dis*. 2008;5(3):169-76.  
34
- 35  
36 40. Svartberg J, Aasebo U, Hjalmarsen A, *et al*. Testosterone treatment improves body  
37  
38 composition and sexual function in men with COPD, in a 6-month randomized  
39  
40 controlled trial. *Respir Med*. 2004 Sep;98(9):906-13.  
41
- 42  
43 41. Ding EL, Song Y, Malik VS, *et al*. Sex differences of endogenous sex hormones and  
44  
45 risk of type 2 diabetes: a systematic review and meta-analysis. *JAMA*. 2006 Mar  
46  
47 15;295(11):1288-99.  
48
- 49  
50 42. Brand JS, van der Tweel I, Grobbee DE, *et al*. Testosterone, sex hormone-binding  
51  
52 globulin and the metabolic syndrome: a systematic review and meta-analysis of  
53  
54 observational studies. *Int J Epidemiol*. 2011 Feb;40(1):189-207.  
55  
56  
57  
58  
59  
60

- 1  
2  
3 43. Almeida OP, Yeap BB, Hankey GJ, *et al.* Low free testosterone concentration as a  
4 potentially treatable cause of depressive symptoms in older men. Arch Gen  
5 Psychiatry. 2008 Mar;65(3):283-9.  
6  
7  
8  
9  
10 44. Atlantis E, Fahey P, Cochrane B, *et al.* Bidirectional associations between clinically  
11 relevant depression or anxiety and chronic obstructive pulmonary disease (COPD): a  
12 systematic review and meta-analysis. CHEST.in press.  
13  
14  
15  
16  
17 45. Almagro P, Cabrera FJ, Diez J, *et al.* Comorbidities and short-term prognosis in  
18 patients hospitalized for acute exacerbation of COPD. The ESMI study. Chest. 2012  
19 Apr 5.  
20  
21  
22  
23  
24 46. Kupeli E, Ulubay G, Ulasli SS, *et al.* Metabolic Syndrome is associated with  
25 increased risk of acute exacerbation of COPD: a preliminary study. Endocrine. 2010  
26 Aug;38(1):76-82.  
27  
28  
29  
30 47. Guo W, Wong S, Li M, *et al.* Testosterone plus low-intensity physical training in late  
31 life improves functional performance, skeletal muscle mitochondrial biogenesis, and  
32 mitochondrial quality control in male mice. PLoS One. 2012;7(12):e51180.  
33  
34  
35  
36  
37  
38  
39  
40  
41  
42  
43  
44  
45  
46  
47  
48  
49  
50  
51  
52  
53  
54  
55  
56  
57  
58  
59  
60

TABLE 1: Characteristics of observational studies reviewed

| Study identification                 | Country       | Participants                                                                                     |                                                                                                   | Sample size | Sex | Mean age (years) | Mean (SD) or median* (range) total testosterone, nmol/L |          |       |          | Covariate considerations (adjusted/excluded/matched)                                                                                                                                                                                                  | Quality score (out of 5) |
|--------------------------------------|---------------|--------------------------------------------------------------------------------------------------|---------------------------------------------------------------------------------------------------|-------------|-----|------------------|---------------------------------------------------------|----------|-------|----------|-------------------------------------------------------------------------------------------------------------------------------------------------------------------------------------------------------------------------------------------------------|--------------------------|
|                                      |               | Cases, assessment                                                                                | Controls                                                                                          |             |     |                  | Cases                                                   | Controls |       |          |                                                                                                                                                                                                                                                       |                          |
| Bratel et al, 2000 <sup>30</sup>     | Sweden        | COPD with severe airway obstruction and daytime hypoxaemia, not reported                         | Age-matched "healthy" participants                                                                | 32          | M   | 69               | 14.3                                                    | 6.9      | 17.9  | 6.9      | Age                                                                                                                                                                                                                                                   | 1.2                      |
| Gow et al, 1987 <sup>28</sup>        | Scotland      | COPD, spirometry FEV1 <40% and FVC <65% predicted                                                | Inpatients ready for discharge                                                                    | 26          | M   | 70               | 10.7                                                    | 3.0-19.5 | 11.0  | 1.8-21.9 | Age, thyroid disease, oral corticosteroids                                                                                                                                                                                                            | 2.9                      |
| Iqbal et al, 1999 <sup>31</sup>      | United States | Chronic lung disease, predominantly spirometry FEV1/FVC <80% predicted                           | Primary care clinic patients without history of chronic lung disease or corticosteroid treatments | 85          | M   | 62               | 11.1                                                    | 9.8      | 14.0  | 8.6      | Age, ethnicity, BMI, physical activity, smoking status, caffeine and alcohol consumption, thyroid and rheumatologic conditions, medications including glucocorticoids, testosterone, and for osteoporosis                                             | 4.0                      |
| Hsu et al, 2006 <sup>32</sup>        | Taiwan        | Chronic bronchitis and COPD, GOLD criteria stage 1-4                                             | Outpatients with stable urolithiasis or prostatitis                                               | 213         | M   | 71               | 14.7                                                    | 7.7      | 15.3  | 6.4      | Age, chronic diseases including treated benign prostate hyperplasia, other chronic lung disease, exacerbation                                                                                                                                         | 2.9                      |
| Kaparianos et al, 2011 <sup>12</sup> | Greece        | COPD, GOLD criteria mean FEV1 54%, mean FEV1/FVC 59%                                             | Outpatient smokers                                                                                | 125         | M   | 61               | 11.2                                                    | 4.4      | 18.4  | 4.5      | Age, ethnicity, BMI, smoking, chronic diseases, endothelin-1 pro-inflammatory allele, other chronic lung diseases, medications including $\beta$ 2-adrenergic agonists, corticosteroids, follicle stimulating hormone, erythrocyte sedimentation rate | 3.5                      |
| Karadag et al, 2007 <sup>13</sup>    | Turkey        | COPD, GOLD criteria stage 2-3                                                                    | Age-matched participants                                                                          | 125         | M   | 63               | 13.2                                                    | 5.5      | 16.6  | 5.5      | Age, sexual partner status, BMI, medications that interfere with sex hormones, chronic diseases, treated urogenital disease, aged $\geq$ 75 years, regular systemic corticosteroids, oestradiol, tumor necrosis factor-alpha                          | 3.0                      |
| Semple et al, 1981 <sup>29</sup>     | Scotland      | COPD, spirometry FEV1 and FEV1/FVC <70%                                                          | Age-matched inpatients                                                                            | 16          | M   | 50               | 13.1                                                    | 4.4      | 20.3  | 5.4      | Age                                                                                                                                                                                                                                                   | 2.7                      |
| Svartberg et al, 2007 <sup>33</sup>  | Norway        | Representative population with COPD, spirometry FEV1 <50% predicted with FEV1/FVC <70% predicted | Representative population with spirometry FEV1 $\geq$ 50% predicted                               | 2197        | M   | 66               | 12.7                                                    | 5.3      | 14.0  | 5.5      | Age, waist circumference, smoking status                                                                                                                                                                                                              | 3.6                      |
| Van Vliet et al,                     | Belgium       | COPD, GOLD criteria stage 1-4                                                                    | Outpatients with normal                                                                           | 99          | M   | 65               | 9.0*                                                    | 6.8-12.9 | 12.3* | 8.8-16.2 | Age, BMI, calculated low free                                                                                                                                                                                                                         | 2.9                      |

1  
2  
3  
4  
5  
6  
7  
8  
9  
10  
11  
12  
13  
14  
15  
16  
17  
18  
19  
20  
21  
22  
23  
24  
25  
26  
27  
28  
29  
30  
31  
32  
33  
34  
35  
36  
37  
38  
39  
40  
41  
42  
43  
44  
45  
46  
47  
48  
49

|                    |               |                                            |
|--------------------|---------------|--------------------------------------------|
| 2005 <sup>34</sup> | lung function | testosterone, sex hormone binding globulin |
|--------------------|---------------|--------------------------------------------|

---

Abbreviations: COPD, chronic obstructive pulmonary disease; M, men; GOLD, Global Initiative for Chronic Obstructive Lung Disease; BTS, British Thoracic Society; FEV1, forced expiratory volume in one second; FVC, forced vital capacity; BMI, body mass index; Matched, considered if between-group difference in characteristic was not likely statistically significant ( $P<0.05$ );

---

For peer review only

TABLE 2: Characteristics of randomised controlled trials reviewed

adjacent.....continued →

| Study identification                 | Country         | Sample size | Population                                                                                                                                                                                                                  | Sex (M/W)                                                                                                                                                                                                                        | Mean age (years) | Baseline mean total testosterone, nmol/L |                       |                      |
|--------------------------------------|-----------------|-------------|-----------------------------------------------------------------------------------------------------------------------------------------------------------------------------------------------------------------------------|----------------------------------------------------------------------------------------------------------------------------------------------------------------------------------------------------------------------------------|------------------|------------------------------------------|-----------------------|----------------------|
|                                      |                 |             | Major inclusion criteria                                                                                                                                                                                                    | Major exclusion criteria                                                                                                                                                                                                         |                  | Treated                                  | Controls              |                      |
| Casaburi et al, 2004 <sup>36</sup>   | United States   | 47          | Stable COPD, spirometry FEV1 $\leq$ 60% predicted and FEV1/VC $\leq$ 60%; total testosterone $\leq$ 13.9nmol/L                                                                                                              | CVD, low or high bodyweight, prostatic indications, haemoglobin $\geq$ 16g/dL, orthopaedic impairments                                                                                                                           | M                | 67                                       | (a) 10.5;<br>(b) 14.1 | (a) 10.5;<br>(b) 9.6 |
| Creutzberg et al, 2003 <sup>37</sup> | The Netherlands | 56          | Stable COPD, ATS criteria, spirometry FEV1 $<$ 70% predicted and increase in FEV1 $<$ 10% post bronchodilation                                                                                                              | Obesity, malignancies, CVD, gastro-intestinal inflammatory disorders, type 1 diabetes, oxygen dependency at rest                                                                                                                 | M                | 66                                       | 13.4                  | 14.6                 |
| Ferreira et al, 1998 <sup>38</sup>   | Brazil          | 17          | Ambulatory and stable COPD, spirometry maximal inspiratory pressure $<$ 60% predicted and BMI $<$ 20kg/m <sup>2</sup>                                                                                                       | CVD, prostatic indications                                                                                                                                                                                                       | M                | 69                                       | 14.4                  | 17.2                 |
| Pison et al, 2011 <sup>16</sup>      | France          | 122         | Stable CRF, $>$ 18 years, PaO <sub>2</sub> $\leq$ 8kPa, long-term oxygen therapy and/or home mechanical ventilation $>$ three months, BMI $\leq$ 21kg/m <sup>2</sup> or fat-free mass index $<$ 25 <sup>th</sup> percentile | Pulmonary hypertension, sleep apnoea, prostatic indications, neuromuscular diseases, cystic fibrosis, conditions compromising six month survival, hormone-dependent cancer, women of childbearing age, elevated aminotransferase | M/W              | 66                                       | M 12.7;<br>W 0.45     | M 13.6;<br>W 0.42    |
| Sharma et al, 2008 <sup>39</sup>     | Canada          | 16          | Stable COPD, GOLD criteria stage 3-4, spirometry FEV1 $<$ 50% predicted and FEV1/FVC $<$ 0.7                                                                                                                                | History of asthma, obesity, malignancy, CVD, prostatic indications, renal, hepatic, gastrointestinal or endocrine disease, recent surgery $\leq$ two months                                                                      | M/W              | 68                                       | M NR                  | W NR                 |
| Svartberg et al, 2004 <sup>40</sup>  | Norway          | 29          | Stable COPD, moderate to severe, spirometry FEV1 $<$ 60% predicted                                                                                                                                                          | Asthma, malignancies, CVD, hepatic or endocrine disease                                                                                                                                                                          | M                | 66                                       | 21.6                  | 20.5                 |

Abbreviations: COPD, chronic obstructive pulmonary disease; CVD, cardiovascular diseases; CRF, chronic respiratory failure; GOLD, Global Initiative for Chronic Obstructive Lung Disease; ATS, American Thoracic Society; FEV1, forced expiratory volume in one second; FVC, forced vital capacity; M, men; W, women; IM, intramuscular injection; RT, resistance training; PR, pulmonary rehabilitation; IRM, one repetition maximum; VO<sub>2</sub>, volume of oxygen uptake; HRQoL, health-related quality of life; 6MWT, six minute walking test; CRQ, chronic respiratory questionnaire; NR, not reported

→ adjacent.....continued

| Treatments                                                                                              | Control conditions                                                   | Trial duration (weeks) | Outcomes (assessments, units)                                                                                                                                                                                       | Quality score (out of 8) |
|---------------------------------------------------------------------------------------------------------|----------------------------------------------------------------------|------------------------|---------------------------------------------------------------------------------------------------------------------------------------------------------------------------------------------------------------------|--------------------------|
| (a) Testosterone enanthate, 100mg per week IM;<br>(b) Testosterone enanthate, 100mg per week IM with RT | (a) Placebo;<br>(b) Placebo with RT                                  | 10                     | Muscle strength (leg press, 1RM kg); Cardiorespiratory fitness (bicycle, peak VO <sub>2</sub> L/min and peak workload Watts)                                                                                        | 5.0                      |
| Nandrolone decanoate, 50mg per two weeks IM                                                             | Placebo                                                              | 8                      | Muscle strength (knee extension, peak isometric force Newtons); Cardiorespiratory fitness (bicycle, peak workload Watts and peak VO <sub>2</sub> ml/min); HRQoL (SGRQ total score)                                  | 6.0                      |
| Testosterone, 250mg IM at baseline and oral stanozolol, 12mg per day with PR                            | Placebo with PR nine to 27 weeks                                     | 27                     | Cardiorespiratory fitness (bicycle, peak VO <sub>2</sub> % predicted; 6MWT, distance metres)                                                                                                                        | 5.0                      |
| Oral testosterone undecanoate, M 80mg/W 40mg twice daily with PR                                        | Home education on self-management of COPD-related stress and anxiety | 13                     | Muscle strength (knee extension, peak isometric force Newtons); Cardiorespiratory fitness (6MWT, distance metres; bicycle, peak workload Watts); HRQoL (CRQ total score)                                            | 5.0                      |
| Nandrolone decanoate, M 50mg/W 25mg per two weeks IM with PR                                            | Placebo with PR                                                      | 16                     | Muscle strength (knee extension, peak isometric force units NR); Cardiorespiratory fitness (bicycle, peak VO <sub>2</sub> % predicted and peak workload Watts; 6MWT, distance metres); HRQoL (CRQ fatigue subscore) | 4.5                      |
| Testosterone enanthate, 250mg per four weeks IM                                                         | Placebo                                                              | 26                     | Cardiorespiratory fitness (6MWT, distance metres)                                                                                                                                                                   | 5.5                      |

**TABLE 3: Sensitivity analysis of observational studies on COPD exposure → total testosterone outcome meta-analysis**

|                                                                 | <i>N</i><br>studies | <i>N</i><br>sample | Total testosterone<br>WMD | (95% confidence<br>interval) | <i>P</i> -value for<br>heterogeneity |
|-----------------------------------------------------------------|---------------------|--------------------|---------------------------|------------------------------|--------------------------------------|
| Fixed effects model                                             | 9                   | 2918               | -3.00                     | (-3.75, -2.26)               | <0.001                               |
| Exclusion of five lower quality studies (score <3.0)            | 4                   | 2532               | -3.68                     | (-7.00, -0.36)               | <0.001                               |
| Model using unadjusted rather than adjusted values in one study | 9                   | 2918               | -2.95                     | (-4.63, -1.27)               | <0.001                               |
| Exclusion of a large sample size study                          | 8                   | 721                | -3.56                     | (-5.63, -1.49)               | <0.001                               |

Abbreviations: N, number; WMD, weighted mean difference

**TABLE 4: Sensitivity analysis of randomised controlled trials on testosterone treatment → muscle strength outcomes meta-analysis**

|                                                             | <i>N</i> studies | <i>N</i> sample | SMD  | (95% confidence interval) | <i>P</i> -value for heterogeneity |
|-------------------------------------------------------------|------------------|-----------------|------|---------------------------|-----------------------------------|
| Fixed effects model                                         | 5                | 241             | 0.31 | (0.05, 0.56)              | 0.839                             |
| Exclusion of one lower quality study (score <5.0)           | 4                | 225             | 0.31 | (0.04, 0.57)              | 0.699                             |
| Exclusion of two placebo only control studies               | 3                | 161             | 0.30 | (-0.01, 0.62)             | 0.491                             |
| Exclusion of two studies in men and women                   | 3                | 103             | 0.21 | (-0.18, 0.60)             | 0.611                             |
| Exclusion of two longer duration studies ( $\geq 12$ weeks) | 3                | 103             | 0.21 | (-0.18, 0.60)             | 0.611                             |

Abbreviations: N, number; SMD, standardised mean difference



**TABLE 5: Sensitivity analysis of randomised controlled trials on testosterone treatment → cardiorespiratory fitness outcomes meta-analysis**

|                                                                     | <i>N</i> studies | <i>N</i> sample | SMD  | (95% confidence interval) | <i>P</i> -value for heterogeneity |
|---------------------------------------------------------------------|------------------|-----------------|------|---------------------------|-----------------------------------|
| Fixed effects model                                                 | 5                | 136             | 0.21 | (-0.13, 0.56)             | 0.379                             |
| Exclusion of one lower quality study (score <5.0)                   | 4                | 120             | 0.13 | (-0.27, 0.54)             | 0.315                             |
| Exclusion of two placebo only control studies                       | 3                | 56              | 0.03 | (-0.60, 0.66)             | 0.269                             |
| Exclusion of one study in men and women                             | 4                | 120             | 0.13 | (-0.27, 0.54)             | 0.315                             |
| Exclusion of two longer duration study ( $\geq 12$ weeks)           | 3                | 103             | 0.27 | (-0.12, 0.67)             | 0.553                             |
| Model using peak workload rather than peak VO <sub>2</sub> outcomes | 5                | 241             | 0.27 | (0.01, 0.52)              | 0.741                             |
| Model using 6MWT rather than peak VO <sub>2</sub> outcomes          | 4                | 184             | 0.10 | (-0.34, 0.53)             | 0.210                             |

Abbreviations: N, number; SMD, standardised mean difference

1  
2  
3  
4  
5  
6  
7  
8  
9  
10  
11  
12  
13  
14  
15  
16  
17  
18  
19  
20  
21  
22  
23  
24  
25  
26  
27  
28  
29  
30  
31  
32  
33  
34  
35  
36  
37  
38  
39  
40  
41  
42  
43

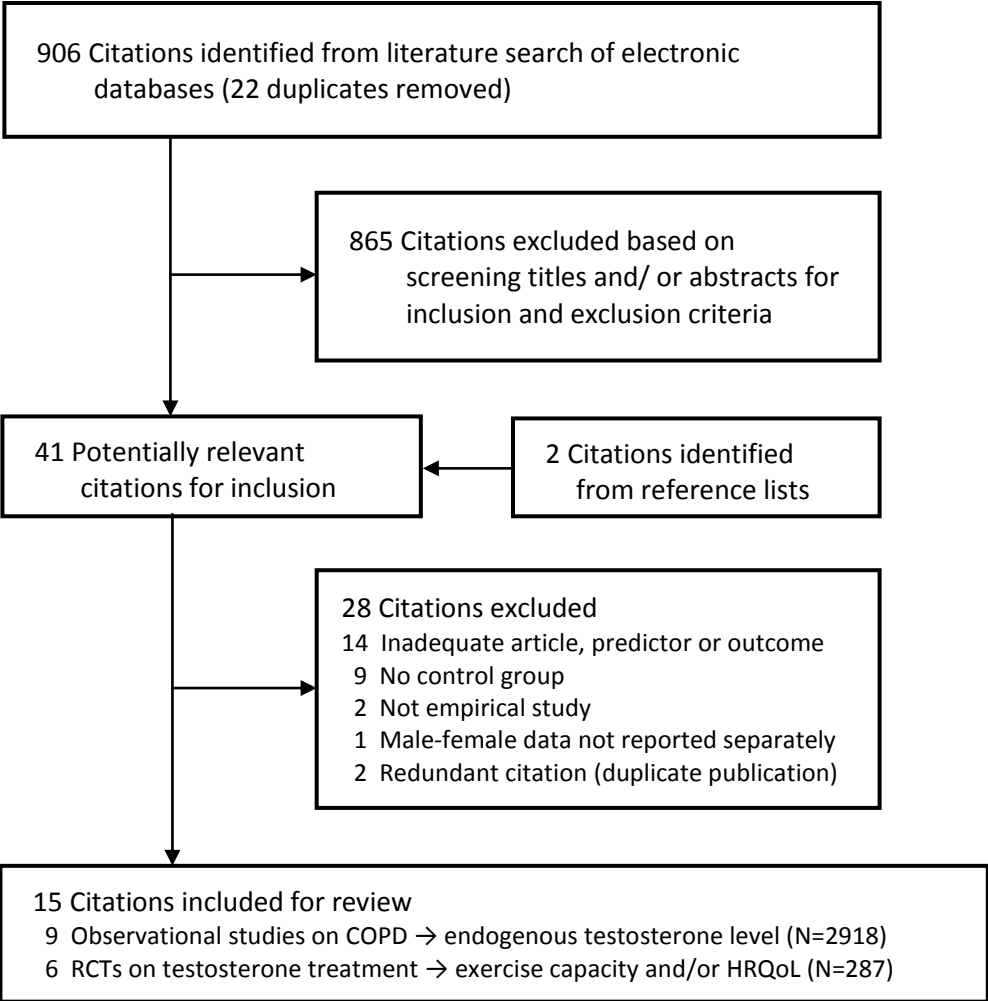

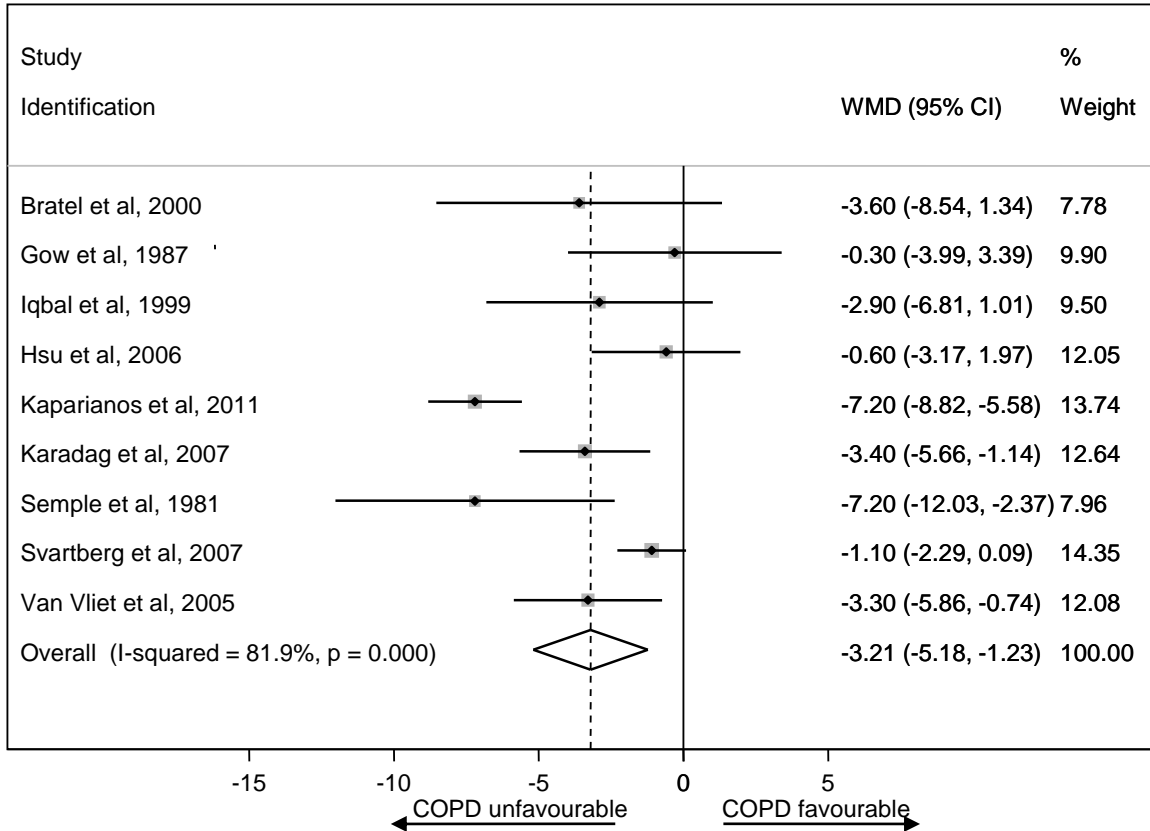

1  
2  
3  
4  
5  
6  
7  
8  
9  
10  
11  
12  
13  
14  
15  
16  
17  
18  
19  
20  
21  
22  
23  
24  
25  
26  
27  
28  
29  
30  
31  
32  
33  
34  
35  
36  
37  
38  
39  
40  
41  
42  
43

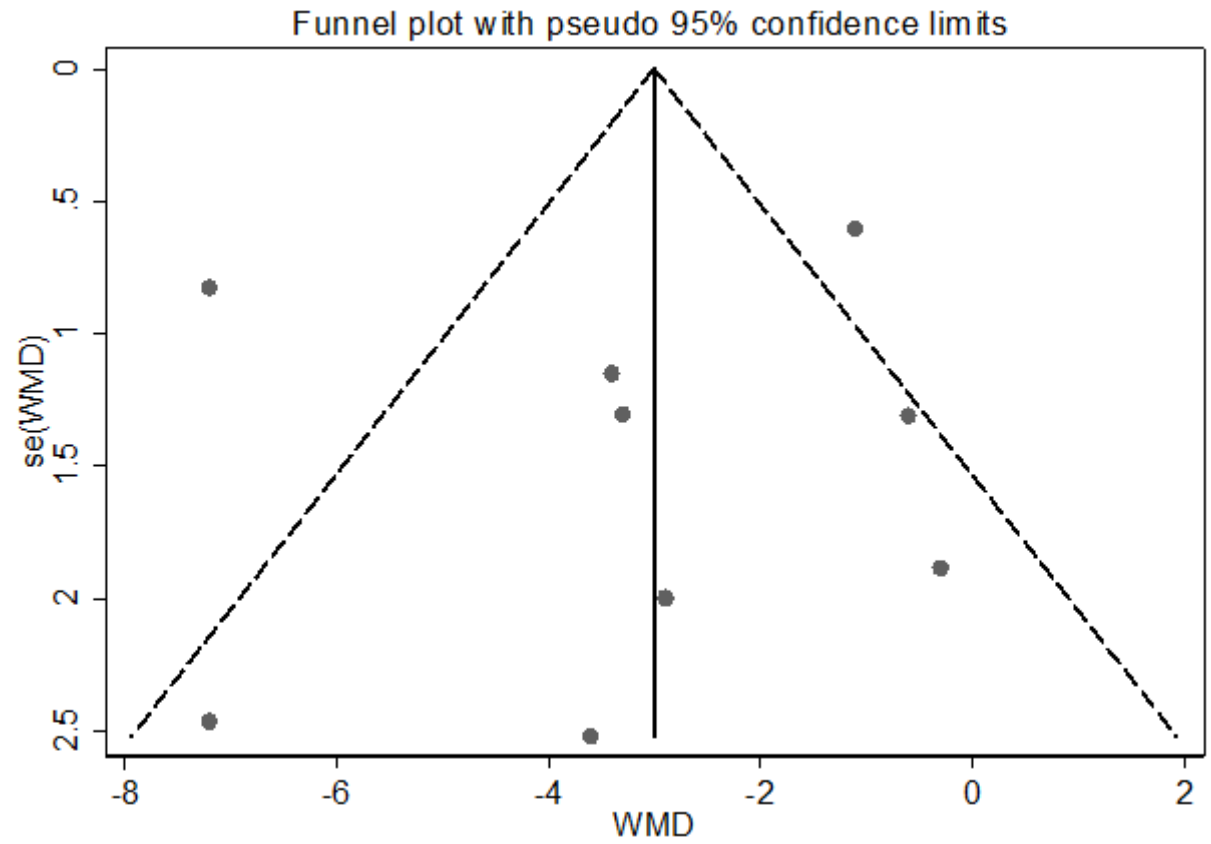

1  
2  
3  
4  
5  
6  
7  
8  
9  
10  
11  
12  
13  
14  
15  
16  
17  
18  
19  
20  
21  
22  
23  
24  
25  
26  
27  
28  
29  
30  
31  
32  
33  
34  
35  
36  
37  
38  
39  
40  
41  
42  
43

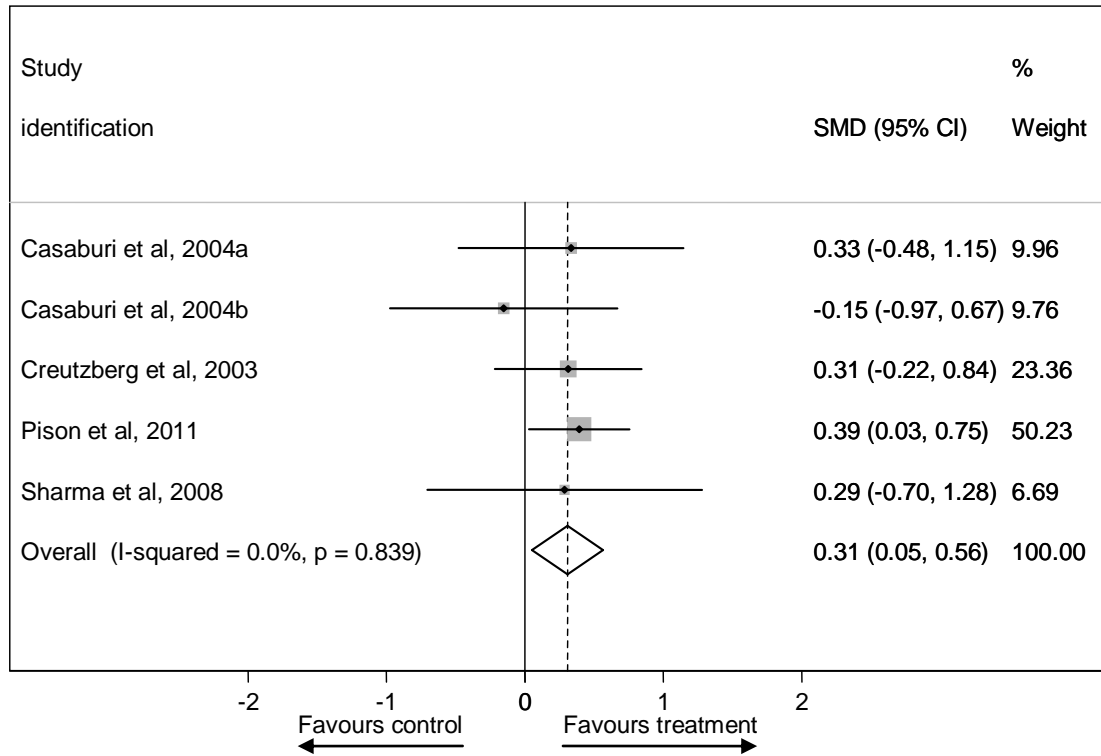

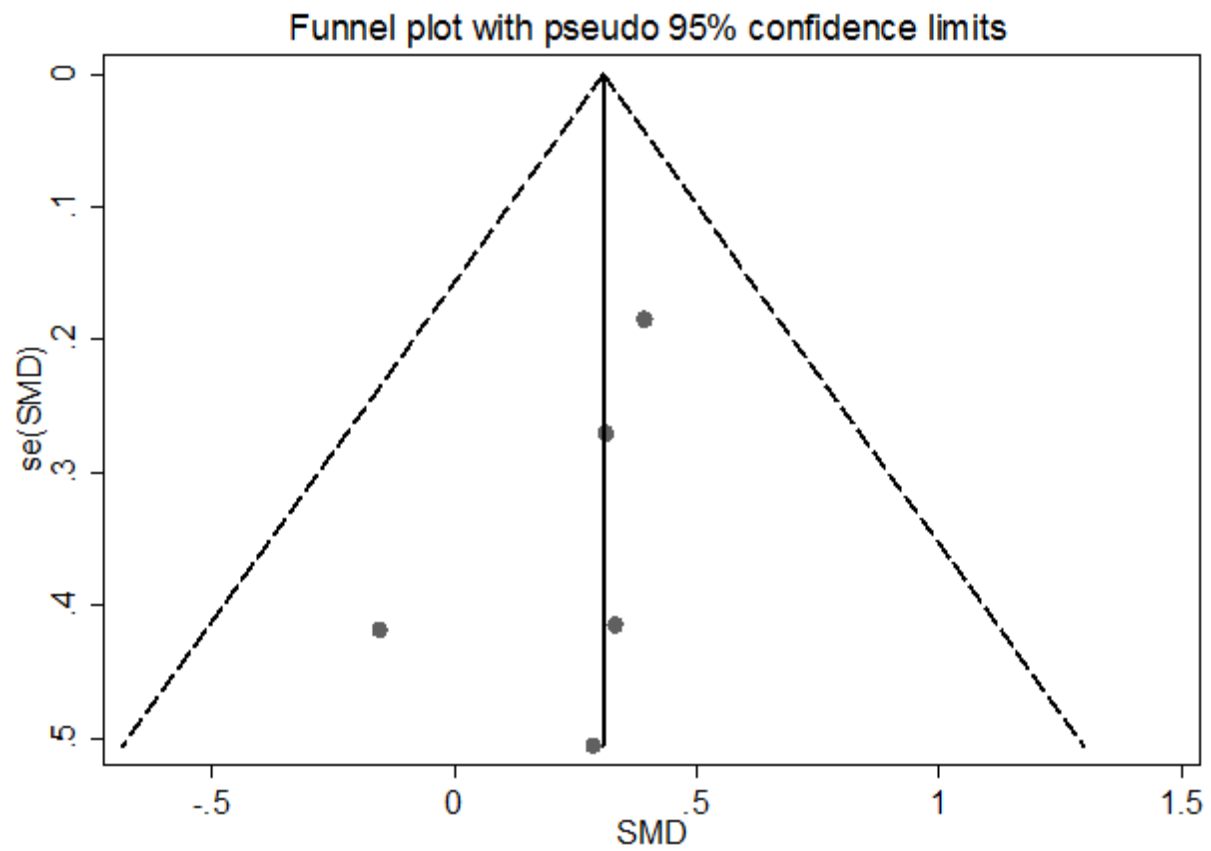

1  
2  
3  
4  
5  
6  
7  
8  
9  
10  
11  
12  
13  
14  
15  
16  
17  
18  
19  
20  
21  
22  
23  
24  
25  
26  
27  
28  
29  
30  
31  
32  
33  
34  
35  
36  
37  
38  
39  
40  
41  
42  
43

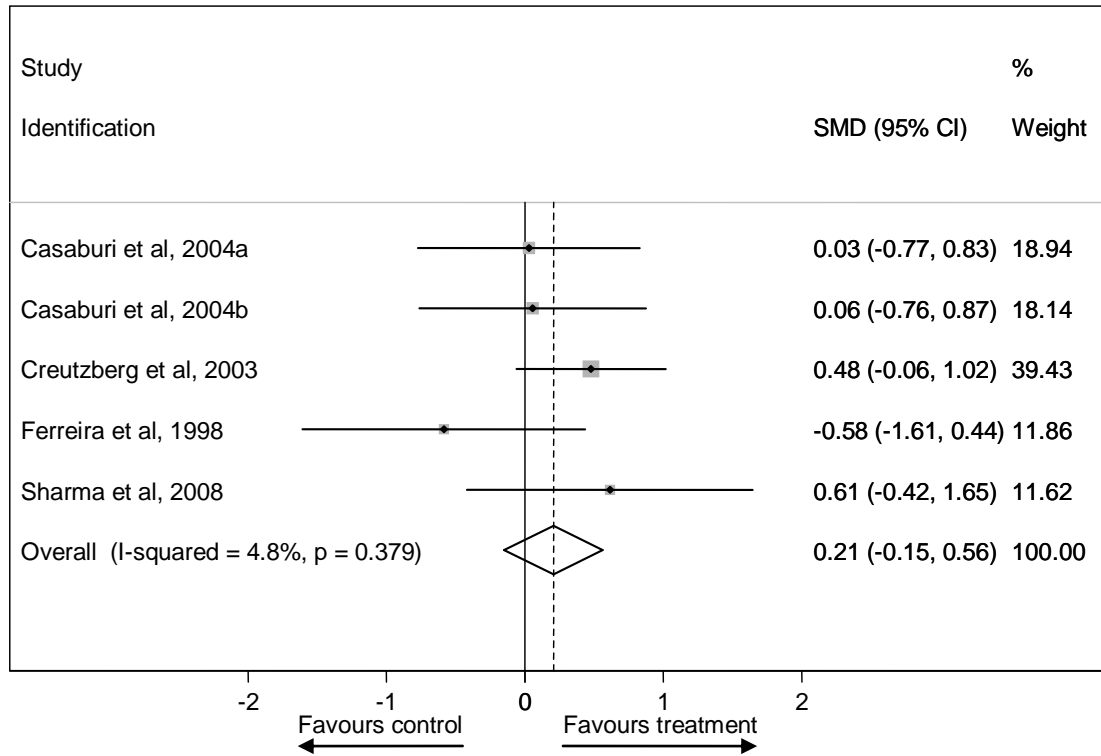

1  
2  
3  
4  
5  
6  
7  
8  
9  
10  
11  
12  
13  
14  
15  
16  
17  
18  
19  
20  
21  
22  
23  
24  
25  
26  
27  
28  
29  
30  
31  
32  
33  
34  
35  
36  
37  
38  
39  
40  
41  
42  
43

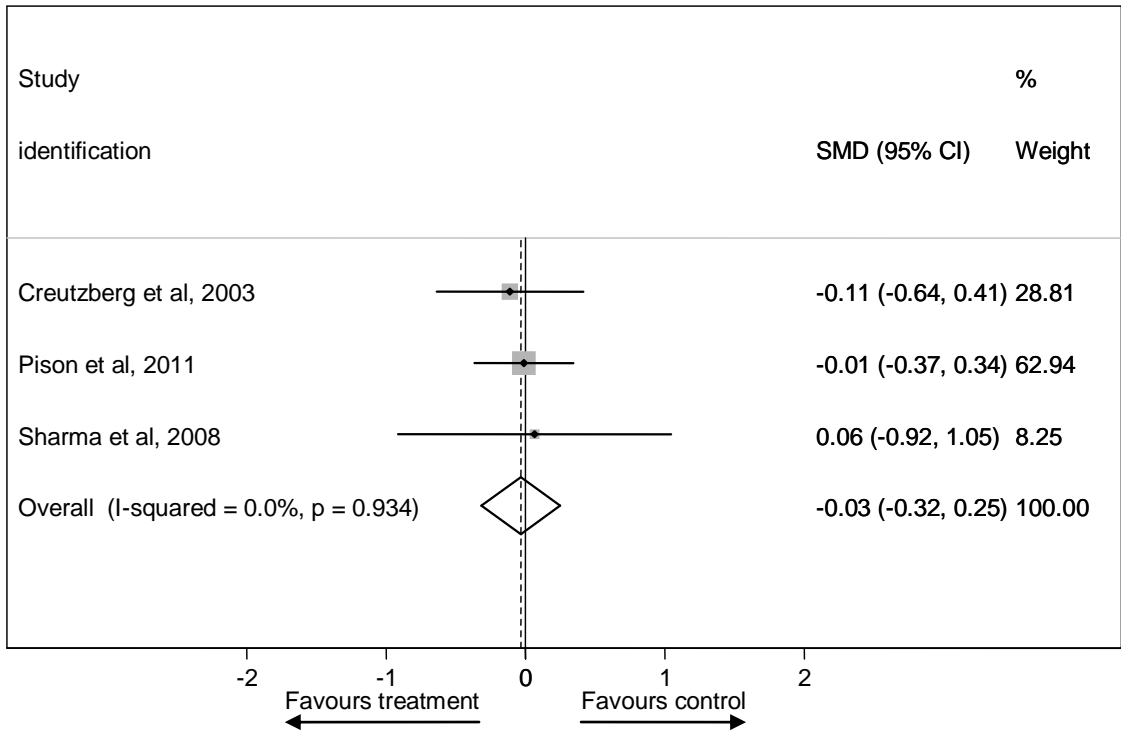



## APPENDIX

### PubMed search syntax

(Gonadal Steroid Hormones[mh] OR Sex Steroid\*[tw] OR Sex Hormone\*[tw] OR Steroid Hormone\*[tw] OR Gonadal Steroid\*[tw] OR Androgens[mh] OR Testosterone[tw]) AND (Pulmonary Emphysema[mh] OR Emphysema\*[tw] OR Pulmonary Disease, Chronic Obstructive[mh] OR COPD[tw] OR Chronic Obstructive Pulmonary Disease[tw] OR COAD[tw] OR Chronic Obstructive Airway Disease[tw] OR Chronic Obstructive Lung Disease[tw] OR Airflow Obstruction\*[tw] OR Lung Diseases, Obstructive[mh] OR Obstructive Lung[tw] OR Obstructive Pulmonary[tw] OR Bronchitis[mh] OR Bronchitis[tw]) NOT (Asthma[mh] OR Asthma\*[tw])

### Scopus search syntax

((TITLE-ABS-KEY(steroid hormone\*) OR TITLE-ABS-KEY(sex steroid\*) OR TITLE-ABS-KEY(sex hormone\*) OR TITLE-ABS-KEY(steroid hormone\*) OR TITLE-ABS-KEY(androgen\*) OR TITLE-ABS-KEY(testosterone)) AND (TITLE-ABS-KEY(pulmonary emphysema) OR TITLE-ABS-KEY(emphysema\*) OR TITLE-ABS-KEY(pulmonary disease, chronic obstructive) OR TITLE-ABS-KEY(copd) OR TITLE-ABS-KEY(chronic obstructive pulmonary disease) OR TITLE-ABS-KEY(coad) OR TITLE-ABS-KEY(chronic obstructive airway disease) OR TITLE-ABS-KEY(chronic obstructive lung disease) OR TITLE-ABS-KEY(airflow obstruction\*) OR TITLE-ABS-KEY(lung diseases, obstructive) OR TITLE-ABS-KEY(obstructivelung) OR TITLE-ABS-KEY(obstructive pulmonary) OR TITLE-ABS-KEY(bronchitis))) AND NOT (TITLE-ABS-KEY(asthma))

**Cochrane Library search syntax**

Hits Edit Delete #1 (Gonadal Steroid Hormones[mh] OR Sex Steroid\*[tw] OR Sex Hormone\*[tw] OR Steroid Hormone\*[tw] OR Gonadal Steroid\*[tw] OR Androgens[mh] OR Testosterone[tw]) AND (Pulmonary Emphysema[mh] OR Emphysema\*[tw] OR Pulmonary Disease, Chronic Obstructive[mh] OR COPD[tw] OR Chronic Obstructive Pulmonary Disease[tw] OR COAD[tw] OR Chronic Obstructive Airway Disease[tw] OR Chronic Obstructive Lung Disease[tw] OR Airflow Obstruction\*[tw] OR Lung Diseases, Obstructive[mh] OR Obstructive Lung[tw] OR Obstructive Pulmonary[tw] OR Bronchitis[mh] OR Bronchitis[tw]) NOT (Asthma[mh] OR Asthma\*[tw]):ti,ab,kw

1  
2  
3  
4  
5  
6  
7  
8  
9  
10  
11  
12  
13  
14  
15  
16  
17  
18  
19  
20  
21  
22  
23  
24  
25  
26  
27  
28  
29  
30  
31  
32  
33  
34  
35  
36  
37  
38  
39  
40  
41  
42  
43  
44  
45  
46  
47  
48  
49

Quality item checklist for observational studies reviewed (each worth 1 numerical point)

| Study identification   | COPD assessment adequate? | Testosterone assay adequate? | Generalizability? (study population representative of clinical setting or community) | Covariate considerations adequate? (each worth 0.2 points): (1) age, (2) socio-economic or partner status, (3) central or general obesity, (4) smoking status, (5) alcohol intake, (6) physical activity, (7) depression or anxiety (or medications), (8) metabolic syndrome or cardiovascular disease (or medications), (9) systemic inflammation (or glucocorticoids), (10) sleep apnoea (or treatments) | Total quality score (out of 5) |
|------------------------|---------------------------|------------------------------|--------------------------------------------------------------------------------------|------------------------------------------------------------------------------------------------------------------------------------------------------------------------------------------------------------------------------------------------------------------------------------------------------------------------------------------------------------------------------------------------------------|--------------------------------|
| Bratel et al, 2000     | 0                         | 1                            | 0                                                                                    | 0.2                                                                                                                                                                                                                                                                                                                                                                                                        | 1.2                            |
| Gow et al, 1987        | 1.0                       | 1.0                          | 0.5                                                                                  | 0.4                                                                                                                                                                                                                                                                                                                                                                                                        | 2.9                            |
| Qbal et al, 1999       | 1.0                       | 1.0                          | 1.0                                                                                  | 1.0                                                                                                                                                                                                                                                                                                                                                                                                        | 4.0                            |
| Hsu et al, 2006        | 1.0                       | 1.0                          | 0.5                                                                                  | 0.4                                                                                                                                                                                                                                                                                                                                                                                                        | 2.9                            |
| Kaparianos et al, 2011 | 1.0                       | 1.0                          | 0.5                                                                                  | 1.0                                                                                                                                                                                                                                                                                                                                                                                                        | 3.5                            |
| Karadag et al, 2007    | 1.0                       | 1.0                          | 0.0                                                                                  | 1.0                                                                                                                                                                                                                                                                                                                                                                                                        | 3.0                            |
| Temple et al, 1981     | 1.0                       | 1.0                          | 0.5                                                                                  | 0.2                                                                                                                                                                                                                                                                                                                                                                                                        | 2.7                            |
| Svartberg et al, 2007  | 1.0                       | 1.0                          | 1.0                                                                                  | 0.6                                                                                                                                                                                                                                                                                                                                                                                                        | 3.6                            |
| van Vliet et al, 2005  | 1.0                       | 1.0                          | 0.5                                                                                  | 0.4                                                                                                                                                                                                                                                                                                                                                                                                        | 2.9                            |

For peer review only

1  
2  
3  
4  
5  
6  
7  
8  
9  
10  
11  
12  
13  
14  
15  
16  
17  
18  
19  
20  
21  
22  
23  
24  
25  
26  
27  
28  
29  
30  
31  
32  
33  
34  
35  
36  
37  
38  
39  
40  
41  
42  
43  
44  
45  
46  
47  
48  
49

For peer review only

Quality item checklist for randomised controlled trials reviewed (each worth 1 numerical point)

| Study identification   | Description of eligibility criteria adequate? | Randomization adequate? (each worth 0.5 points): (1) evidence suggesting "random" allocation; (2) evidence suggesting method used to generate random allocation sequence | Allocation concealment adequate? | Between-group prognostic indicators balanced? (each worth 0.5 points): (1) COPD severity; (2) total testosterone level | Care providers blinded? | Between-group drop-outs balanced? | Intention to treat analysis included? | Adverse events reported? | Total quality score (out of 8) |
|------------------------|-----------------------------------------------|--------------------------------------------------------------------------------------------------------------------------------------------------------------------------|----------------------------------|------------------------------------------------------------------------------------------------------------------------|-------------------------|-----------------------------------|---------------------------------------|--------------------------|--------------------------------|
| Casaburi et al, 2004   | 1.0                                           | 0.5                                                                                                                                                                      | 0.0                              | 0.5                                                                                                                    | 1.0                     | 1.0                               | 0.0                                   | 1.0                      | 5.0                            |
| Creutzberg et al, 2003 | 1.0                                           | 1.0                                                                                                                                                                      | 1.0                              | 1.0                                                                                                                    | 1.0                     | 0.0                               | 0.0                                   | 1.0                      | 6.0                            |
| Ferreira et al, 1998   | 1.0                                           | 0.5                                                                                                                                                                      | 0.0                              | 1.0                                                                                                                    | 1.0                     | 1.0                               | 0.0                                   | 1.0                      | 5.0                            |
| Pison et al, 2011      | 1.0                                           | 1.0                                                                                                                                                                      | 1.0                              | 1.0                                                                                                                    | 0.0                     | 0.0                               | 0.0                                   | 1.0                      | 5.0                            |
| Sharma et al, 2008     | 1.0                                           | 0.5                                                                                                                                                                      | 0.0                              | 0.0                                                                                                                    | 1.0                     | 1.0                               | 0.0                                   | 1.0                      | 4.5                            |
| Svartberg et al, 2004  | 1.0                                           | 0.5                                                                                                                                                                      | 0.0                              | 1.0                                                                                                                    | 1.0                     | 1.0                               | 0.0                                   | 1.0                      | 5.5                            |

**EXCLUDED CITATIONS**

- 1 Banks WA, Cooper JA. Hypoxia and hypercarbia of chronic lung disease: minimal effects on anterior pituitary function. *South Med J* 1990; 83:290-293
- 2 Bratel T, Wennlund A, Carlström K. Pituitary reactivity, androgens and catecholamines in obstructive sleep apnoea. Effects of continuous positive airway pressure treatment (CPAP). *Respiratory medicine* 1999; 93:1-7
- 3 Casaburi R, Cosentino G, Bhasin S, et al. A randomised trial of strength training and testosterone supplementation in men with chronic obstructive pulmonary disease. *European Respiratory Journal*, 2001; 173s
- 4 Chavoshan B, Fournier M, Lewis MI, et al. Testosterone and resistance training effects on muscle nitric oxide synthase isoforms in COPD men. *Respir Med* 2012; 106:269-275
- 5 Collins EG, Halabi S, Langston M, et al. Sexual dysfunction in men with COPD: impact on quality of life and survival. *Lung* 2012; 190:545-556
- 6 D'A.Semple P, Beastall GH, Watson WS, et al. Hypothalamic-pituitary dysfunction in respiratory hypoxia. *Thorax* 1981; 36:605-609
- 7 Debigare R, Marquis K, Cote CH, et al. Catabolic/anabolic balance and muscle wasting in patients with COPD. *Chest* 2003; 124:83-89
- 8 Fletcher EC, Martin RJ. Sexual dysfunction and erectile impotence in chronic obstructive pulmonary disease. *Chest* 1982; 81:413-421
- 9 Kamischke A, Kemper DE, Castel MA, et al. Testosterone levels in men with chronic obstructive pulmonary disease with or without glucocorticoid therapy. *European Respiratory Journal* 1998; 11:41-45

- 1  
2  
3 10 Karadag F, Ozcan H, Karul AB, et al. Sex hormone alterations and systemic  
4 inflammation in chronic obstructive pulmonary disease. *Int J Clin Pract* 2009; 63:275-  
5 281  
6  
7  
8  
9  
10 11 Koehler F, Doehner W, Hoernig S, et al. Anorexia in chronic obstructive pulmonary  
11 disease - Association to cachexia and hormonal derangement. *International Journal of*  
12 *Cardiology* 2007; 119:83-89  
13  
14  
15  
16 12 Korneiko AG, Sivachenko TP, Mechev DS, et al. [Concentration of sex hormones in  
17 chronic bronchitis in men]. *Vrach Delo* 1989:38-39  
18  
19  
20  
21 13 Laghi F, Antonescu-Turcu A, Collins E, et al. Hypogonadism in men with chronic  
22 obstructive pulmonary disease: prevalence and quality of life. *Am J Respir Crit Care*  
23 *Med* 2005; 171:728-733  
24  
25  
26  
27 14 Lewis MI, Fournier M, Storer TW, et al. Skeletal muscle adaptations to testosterone  
28 and resistance training in men with COPD. *Journal of applied physiology (Bethesda,*  
29 *Md. : 1985),* 2007; 1299-1310  
30  
31  
32  
33  
34 15 MacAdams MR, White RH, Chipps BE. Reduction of serum testosterone levels  
35 during chronic glucocorticoid therapy. *Ann Intern Med* 1986; 104:648-651  
36  
37  
38 16 Makarevich AE. Disorders of sex hormone status in patients with chronic obstructive  
39 pulmonary disease. *Wiad Lek* 2003; 56:140-146  
40  
41  
42  
43 17 Marmorston J, Weiner JM, Hopkins CE, et al. Abnormalities in urinary hormone  
44 patterns in lung cancer and emphysema. *Cancer* 1966; 19:985-995  
45  
46  
47 18 Morrison D, Capewell S, Reynolds SP, et al. Testosterone levels during systemic and  
48 inhaled corticosteroid therapy. *Respir Med* 1994; 88:659-663  
49  
50  
51  
52 19 Mulligan T, Frick MF, Zuraw QC, et al. Prevalence of hypogonadism in males aged at  
53 least 45 years: the HIM study. *International Journal of Clinical Practice* 2006; 60:762-  
54 769  
55  
56  
57  
58  
59  
60

- 1  
2  
3 20 Newton D, Bone I, Barrow SM, et al. Pituitary suppression in chronic airways  
4 disease? British Medical Journal 1979; 2:52  
5  
6  
7 21 Praet JP, Peretz A, Rozenberg S, et al. Risk of osteoporosis in men with chronic  
8 bronchitis. Osteoporos Int 1992; 2:257-261  
9  
10  
11 22 Ravaglia G, Forti P, Maioli F, et al. Dehydroepiandrosterone-sulfate serum levels and  
12 common age-related diseases: results from a cross-sectional Italian study of a general  
13 elderly population. Exp Gerontol 2002; 37:701-712  
14  
15  
16  
17 23 Rhee YK, Kim JH, Lee HB, et al. Erectile dysfunction in patients with chronic  
18 obstructive pulmonary disease. Tuberculosis and Respiratory Diseases 2003; 54:304-  
19 310  
20  
21  
22  
23  
24 24 Schols AM, Slangen J, Volovics L, et al. Weight loss is a reversible factor in the  
25 prognosis of chronic obstructive pulmonary disease. American journal of respiratory  
26 and critical care medicine, 1998; 1791-1797  
27  
28  
29  
30 25 Schols AM, Soeters PB, Mostert R, et al. Physiologic effects of nutritional support  
31 and anabolic steroids in patients with chronic obstructive pulmonary disease. A  
32 placebo-controlled randomized trial. Am J Respir Crit Care Med 1995; 152:1268-  
33 1274  
34  
35  
36  
37 26 Seftel A. Testosterone Treatment Improves Body Composition and Sexual Function  
38 in Men With COPD, in a 6-Month Randomized Controlled Trial. J Urol 2005;  
39 173:1278  
40  
41  
42  
43 27 Semple D'A P, Beastall GH, Watson WS, et al. Serum testosterone depression  
44 associated with hypoxia in respiratory failure. Clinical Science 1980; 58:105-106  
45  
46  
47  
48 28 Semple d'A P, Watson WS, Beastall GH. Diet, absorption, and hormone studies in  
49 relation to body weight in obstructive airways disease. Thorax 1979; 34:783-788  
50  
51  
52  
53  
54  
55  
56  
57  
58  
59  
60

1  
2  
3  
4  
5  
6  
7  
8  
9  
10  
11  
12  
13  
14  
15  
16  
17  
18  
19  
20  
21  
22  
23  
24  
25  
26  
27  
28  
29  
30  
31  
32  
33  
34  
35  
36  
37  
38  
39  
40  
41  
42  
43  
44  
45  
46  
47  
48  
49  
50  
51  
52  
53  
54  
55  
56  
57  
58  
59  
60

Figure 1 presents flowchart summarising identification of studies included for review.

For peer review only



1  
2  
3 Figure 2 presents the WMD in endogenous TT level between the case and control groups for  
4  
5 observational studies.  
6  
7  
8  
9  
10  
11  
12  
13  
14  
15  
16  
17  
18  
19  
20  
21  
22  
23  
24  
25  
26  
27  
28  
29  
30  
31  
32  
33  
34  
35  
36  
37  
38  
39  
40  
41  
42  
43  
44  
45  
46  
47  
48  
49  
50  
51  
52  
53  
54  
55  
56  
57  
58  
59  
60

1  
2  
3  
4  
5  
6  
7  
8  
9  
10  
11  
12  
13  
14  
15  
16  
17  
18  
19  
20  
21  
22  
23  
24  
25  
26  
27  
28  
29  
30  
31  
32  
33  
34  
35  
36  
37  
38  
39  
40  
41  
42  
43  
44  
45  
46  
47  
48  
49  
50  
51  
52  
53  
54  
55  
56  
57  
58  
59  
60

Figure 3 presents a funnel plot assessing symmetry of the WMD in TT level between the case and control groups for observational studies.

For peer review only

1  
2  
3 Figure 4 presents the SMD in peak muscle strength outcomes after testosterone therapy  
4  
5 between the treatment and control groups for RCTs.  
6  
7  
8  
9  
10  
11  
12  
13  
14  
15  
16  
17  
18  
19  
20  
21  
22  
23  
24  
25  
26  
27  
28  
29  
30  
31  
32  
33  
34  
35  
36  
37  
38  
39  
40  
41  
42  
43  
44  
45  
46  
47  
48  
49  
50  
51  
52  
53  
54  
55  
56  
57  
58  
59  
60

Figure 5 presents a funnel plot assessing symmetry of the SMD in peak muscle strength outcomes after testosterone treatment between the treatment and control groups for RCTs.

For peer review only

1  
2  
3  
4  
5  
6  
7  
8  
9  
10  
11  
12  
13  
14  
15  
16  
17  
18  
19  
20  
21  
22  
23  
24  
25  
26  
27  
28  
29  
30  
31  
32  
33  
34  
35  
36  
37  
38  
39  
40  
41  
42  
43  
44  
45  
46  
47  
48  
49  
50  
51  
52  
53  
54  
55  
56  
57  
58  
59  
60

1  
2  
3 Figure 6 presents the SMD in peak VO2 outcomes after testosterone therapy between the  
4 treatment and control groups for RCTs.  
5  
6  
7  
8  
9  
10  
11  
12  
13  
14  
15  
16  
17  
18  
19  
20  
21  
22  
23  
24  
25  
26  
27  
28  
29  
30  
31  
32  
33  
34  
35  
36  
37  
38  
39  
40  
41  
42  
43  
44  
45  
46  
47  
48  
49  
50  
51  
52  
53  
54  
55  
56  
57  
58  
59  
60

Figure 7 presents the SMD in peak HRQoL outcomes after testosterone therapy between the treatment and control groups for RCTs

For peer review only

1  
2  
3  
4  
5  
6  
7  
8  
9  
10  
11  
12  
13  
14  
15  
16  
17  
18  
19  
20  
21  
22  
23  
24  
25  
26  
27  
28  
29  
30  
31  
32  
33  
34  
35  
36  
37  
38  
39  
40  
41  
42  
43  
44  
45  
46  
47  
48  
49  
50  
51  
52  
53  
54  
55  
56  
57  
58  
59  
60



**Endogenous testosterone level and testosterone supplementation therapy in chronic obstructive pulmonary disease (COPD): a systematic review and meta-analysis**

|                                 |                                                                                                                                                                                                                                                                                                     |
|---------------------------------|-----------------------------------------------------------------------------------------------------------------------------------------------------------------------------------------------------------------------------------------------------------------------------------------------------|
| Journal:                        | <i>BMJ Open</i>                                                                                                                                                                                                                                                                                     |
| Manuscript ID:                  | bmjopen-2013-003127.R1                                                                                                                                                                                                                                                                              |
| Article Type:                   | Research                                                                                                                                                                                                                                                                                            |
| Date Submitted by the Author:   | 31-May-2013                                                                                                                                                                                                                                                                                         |
| Complete List of Authors:       | Atlantis, Evan; University of Western Sydney, Family and Community Health Research Group School of Nursing and Midwifery<br>Fahey, Paul<br>Cochrane, Belinda<br>Wittert, Gary<br>Smith, Sheree; University of Western Sydney, Family and Community Health Research, School of Nursing and Midwifery |
| <b>Primary Subject Heading</b>: | Respiratory medicine                                                                                                                                                                                                                                                                                |
| Secondary Subject Heading:      | Evidence based practice                                                                                                                                                                                                                                                                             |
| Keywords:                       | Sex steroids & HRT < DIABETES & ENDOCRINOLOGY, Thoracic medicine < INTERNAL MEDICINE, Diabetes & endocrinology < INTERNAL MEDICINE, Chronic airways disease < THORACIC MEDICINE, EPIDEMIOLOGY                                                                                                       |
|                                 |                                                                                                                                                                                                                                                                                                     |

SCHOLARONE™  
Manuscripts

Only

1  
2  
3 Article title: Endogenous testosterone level and testosterone supplementation therapy in  
4  
5 chronic obstructive pulmonary disease (COPD): a systematic review and meta-analysis  
6  
7  
8  
9

10 <sup>1,5</sup>Evan Atlantis, PhD; e-mail: [e.atlantis@uws.edu.au](mailto:e.atlantis@uws.edu.au)

11 <sup>2</sup>Paul Fahey, MMedStat; e-mail: [p.fahey@uws.edu.au](mailto:p.fahey@uws.edu.au)

12 <sup>1,3,4</sup>Belinda Cochrane, MD; e-mail: [belindacochrane@bigpond.com](mailto:belindacochrane@bigpond.com)

13 <sup>5</sup>Gary Wittert, MD; e-mail: [gary.wittert@adelaide.edu.au](mailto:gary.wittert@adelaide.edu.au)

14 <sup>1,6</sup>Sheree Smith, PhD; e-mail: [sheree.smith@uws.edu.au](mailto:sheree.smith@uws.edu.au)

15  
16  
17  
18  
19  
20  
21  
22  
23 <sup>1</sup>School of Nursing and Midwifery, University of Western Sydney, Campbelltown Campus,  
24  
25 New South Wales, Australia

26  
27  
28 <sup>2</sup>School of Science and Health, University of Western Sydney, Campbelltown Campus, New  
29  
30 South Wales, Australia

31  
32 <sup>3</sup>School of Medicine, University of Western Sydney, Campbelltown Campus, New South  
33  
34 Wales, Australia

35  
36  
37 <sup>4</sup>Staff Specialist Respiratory and Sleep Physician, Campbelltown Hospital, New South  
38  
39 Wales, Australia

40  
41 <sup>5</sup>School of Medicine, University of Adelaide, Adelaide, South Australia, Australia

42  
43 <sup>6</sup>Centre for Pharmacology and Therapeutics, Division of Experimental Medicine, Imperial  
44  
45 College, South Kensington, London

46  
47  
48 This research was performed at the University of Western Sydney.

49  
50  
51  
52  
53 Keywords: Gonadal steroid hormones; pulmonary disease, chronic obstructive; lung diseases,  
54  
55 obstructive; exercise therapy; exercise test; quality of life  
56  
57  
58  
59  
60



1  
2  
3 Text word count: 3617  
4

5 Abstract word count: 300  
6  
7  
8  
9

10 For submission to: BMJ open  
11

12 Date: 31 May 2013  
13

14 Corresponding Author: Evan Atlantis, PhD  
15

16 Senior Research Fellow  
17

18 Family and Community Health Research Group  
19

20 School of Nursing and Midwifery | University of Western  
21 Sydney  
22

23 Building 17, Room 17.1.14, Campbelltown Campus,  
24

25 Locked Bag 1797, Penrith NSW 2751 AUSTRALIA  
26

27 Phone: + 61 2 4620 3263  
28

29 Fax: + 61 2 4620 3199  
30

31 Email: [e.atlantis@uws.edu.au](mailto:e.atlantis@uws.edu.au)  
32  
33  
34  
35  
36  
37  
38  
39  
40  
41  
42  
43  
44  
45  
46  
47  
48  
49  
50  
51  
52  
53  
54  
55  
56  
57  
58  
59  
60

**ABSTRACT**

**Objective:** Low testosterone level may be a reversible risk factor for functional disability and deterioration in patients with COPD. We sought to systematically assess endogenous testosterone levels and effect of testosterone therapy on exercise capacity and health-related quality of life (HRQoL) outcomes in COPD patients, to inform guidelines and practice.

**Design:** Systematic review and meta-analysis.

**Data sources:** We searched PubMed, Scopus, Cochrane Library, Cinahl, Health Source Nursing, and PsychINFO and reference lists of retrieved articles published before May 2012.

**Inclusion criteria:** Observational studies on endogenous testosterone levels in people with chronic lung disease compared with controls, or randomised controlled trials (RCTs) on testosterone therapy for exercise capacity and/or HRQoL outcomes in COPD patients were eligible.

**Data extraction and analysis:** Data on the mean difference in endogenous total testosterone (TT) values, and the mean difference in exercise capacity and HRQoL values were extracted and pooled using random effects meta-analysis.

**Results:** Nine observational studies in 2918 men with COPD reported consistently lower levels of total testosterone (TT) compared with controls (weighted mean difference was -3.21nmol/L [95% CI: -5.18, -1.23]). Six RCTs in 287 participants yielded five studies on peak muscle strength and peak cardiorespiratory fitness outcomes (peak oxygen uptake [VO<sub>2</sub>] and workload), and three studies on HRQoL outcomes. Testosterone therapies significantly improved peak muscle strength (standardised mean difference [SMD] was 0.31 [95% CI: 0.05, 0.56]) and peak workload (SMD was 0.27 [95% CI: 0.01, 0.52]) compared with control conditions (all but one used placebo), but not peak VO<sub>2</sub> (SMD was 0.21 [95% CI: -0.15, 0.56]) or HRQoL (SMD was -0.03 [95% CI: -0.32, 0.25]).

1  
2  
3 **Conclusions:** Men with COPD have clinically relevant lower than normal TT levels.  
4  
5 Insufficient evidence from short-term studies in predominately male COPD patients suggest  
6  
7 that testosterone therapy improves exercise capacity outcomes, namely peak muscle strength  
8  
9 and peak workload.  
10  
11  
12  
13  
14  
15  
16  
17  
18  
19  
20  
21  
22  
23  
24  
25  
26  
27  
28  
29  
30  
31  
32  
33  
34  
35  
36  
37  
38  
39  
40  
41  
42  
43  
44  
45  
46  
47  
48  
49  
50  
51  
52  
53  
54  
55  
56  
57  
58  
59  
60

## INTRODUCTION

Chronic obstructive pulmonary disease (COPD) is currently ranked the fifth leading cause of global disability (health loss)[1]. Health status or health-related quality of life (HRQoL) is a clinically important measurement of disability among patients with COPD for prognostic studies and trials[2-4]. Exercise capacity, one of the main determinants of HRQoL, is significantly impaired in COPD patients[3, 5]. Dyspnea and fatigue due to skeletal muscle dysfunction, among other physiological abnormalities, are cardinal symptoms that limit exercise capacity in COPD patients[6]. This is partly due to decreases in muscle strength and mass (often called “cachexia”), since they are characteristic features of skeletal muscle dysfunction contributing to exercise intolerance and consequential deterioration in HRQoL[5, 6]. Conversely, pulmonary rehabilitation including exercise (namely resistance training) leads to clinically relevant improvements in muscle strength and HRQoL[7, 8], indicating that skeletal muscle dysfunction should be a primary therapeutic target for intervention in patients with COPD.

Since testosterone level has been shown to be positively associated with muscle strength and cardiorespiratory fitness accounting for physical activity and muscle mass[9, 10], a low testosterone level may be an independent risk factor for functional disability and deterioration in COPD. For example, levels of testosterone and other androgenic hormones were decreased in both male and female COPD patients compared with controls in a few studies[11-13]. Potential mechanisms for this endocrine dysfunction likely involve hypoxaemia, hypercapnia, systemic inflammation and use of glucocorticoids[14].

Thus, it is important to reliably establish whether the mean endogenous testosterone level is decreased in patients with COPD, because this condition is reversible with testosterone supplementation therapy. Indeed, a small but promising body of randomized controlled trial (RCT) evidence suggests that testosterone therapy improves exercise capacity and HRQoL

1  
2  
3 without increasing serious adverse events[15-17]. While it is difficult to explain this apparent  
4 therapeutic benefit, increased cardiac output[18], haemoglobin and haematocrit[19],  
5 baroreflex sensitivity[20], and exercise tolerance due to improvements in peak oxygen uptake  
6 (peak VO<sub>2</sub>) and muscle strength[20] are all plausible mechanisms.  
7  
8  
9

10  
11 However, our initial analysis of the available published literature indicates an absence of a  
12 systematic review of relevant studies on endogenous testosterone levels and testosterone  
13 therapy in patients with COPD. We therefore sought to systematically review previous  
14 research to assess the mean endogenous testosterone level in people with chronic lung disease  
15 compared with controls, and the effects of testosterone therapies on exercise capacity and  
16 HRQoL outcomes in COPD patients, to inform guidelines and practice.  
17  
18  
19  
20  
21  
22  
23  
24  
25  
26

## 27 **METHODS**

### 28 **Search strategy**

29  
30 We searched PubMed, Scopus, Cochrane Library, Cinahl, Health Source Nursing, and  
31 PsychINFO electronic databases for articles published before May 2012. Search syntaxes  
32 were developed in consultation with an experienced university research librarian taking into  
33 account a broad range of terms and phrases used in definitions of testosterone and COPD  
34 (full electronic search strategies for PubMed, Scopus and Cochrane Library databases in  
35 appendix pages 1, 2). Reference lists of potentially eligible articles were searched by hand to  
36 identify additional studies missed by our search strategy.  
37  
38  
39  
40  
41  
42  
43  
44  
45  
46  
47  
48  
49

### 50 **Study selection**

51  
52 One reviewer (EA) identified potentially relevant studies for inclusion by screening titles  
53 and/or abstracts of all citations identified with our database searches. A second screening was  
54 performed on the full text of these articles. Observational studies in adult populations that  
55  
56  
57  
58  
59  
60

1  
2  
3 reported endogenous testosterone levels in men and/or women (separately) with chronic lung  
4 disease (cases) compared with controls, or RCTs that reported the effects of testosterone  
5 treatment on exercise capacity and HRQoL outcomes in COPD patients were eligible. There  
6  
7  
8 were no language restrictions for articles.  
9  
10

### 11 12 13 14 **Data extraction**

15  
16 Data extraction and quality assessment of included studies were performed and/or verified  
17 independently by three reviewers (EA, BC and SS). Discrepancies were resolved through  
18 discussion. Authors of relevant studies were contacted, where possible, for data that could not  
19  
20  
21  
22  
23 be extracted from the published articles.  
24  
25  
26

### 27 28 **Quality assessment**

29  
30 For methodology and quality assessment, quality checklists were developed to identify  
31 potential sources of bias (tables in appendix pages 3, 4). Quality items for observational  
32 studies reviewed were (each worth 1 numerical point): (1) COPD or chronic lung disease was  
33 reported to have been clinically diagnosed or categorized according to the WHO International  
34 Statistical Classification of Diseases and Related Health Problems (ICD) system, (2)  
35 endogenous testosterone level was measured by radioimmunoassay (RIA) or liquid  
36 chromatography-tandem mass spectrometry (LC-MS/MS), (3) the study population was  
37 representative of the clinical setting or community (i.e., demographic characteristics of cases  
38 and hospital controls were typical and community cases or controls were randomly selected),  
39 and (4) there was adequate adjustment or exclusion or matching for covariates known to be  
40 associated with COPD and hypogonadism in men (each worth 0.2 numerical point): (a) age,  
41 (b) socio-economic or partner status, (c) central or general obesity, (d) smoking status, (e)  
42 alcohol intake, (f) physical activity, (g) depression or anxiety (or medications), (h) metabolic  
43  
44  
45  
46  
47  
48  
49  
50  
51  
52  
53  
54  
55  
56  
57  
58  
59  
60

1  
2  
3 syndrome or cardiovascular disease (or medications), (i) systemic inflammation (or  
4  
5 glucocorticoids), and (j) sleep apnea (or treatments).  
6

7  
8 Quality items for RCT studies reviewed were (each worth 1.0 numerical point): (1) study  
9  
10 eligibility criteria were adequately described, (2) randomization methodology was adequate  
11  
12 (i.e., evidence suggesting “random” method was used to generate and implement random  
13  
14 allocation sequence), (3) allocation concealment was adequate (i.e., evidence to suggest that a  
15  
16 robust method was used for concealing the sequence of treatment allocation (e.g.,  
17  
18 independent IT or telephone service or sealed opaque envelopes only opened in front of the  
19  
20 participant), (4) between-group prognostic indicators were balanced (i.e., evidence showing  
21  
22 that groups were similar at the outset for these prognostic indicators), (5) care providers were  
23  
24 blinded to treatment allocation, (6) between-group drop-out rates were balanced, (7) intention  
25  
26 to treat analysis was included, and (8) adverse events were reported.  
27  
28

29  
30 Our quality checklist scales were designed based on criteria for assessment of  
31  
32 observational studies[21] and RCTs[21, 22] and allowed summed scores to range from 0 to 5  
33  
34 points and 0 to 8 points, respectively, reflecting lowest to highest quality. Studies were  
35  
36 considered ‘better quality’ if they received a score of 3 or higher for observational studies and  
37  
38 of 5 or higher for RCTs, since that meant that they had most of our quality items.  
39  
40  
41  
42

#### 43 44 **Primary outcomes**

45  
46 The primary outcomes were the mean difference in endogenous total testosterone (TT)  
47  
48 values between the case and control groups for observational studies (the most frequently  
49  
50 reported testosterone outcome in relevant studies), and the mean difference in exercise  
51  
52 capacity and HRQoL values after intervention (post-treatment) between the treatment and  
53  
54 control groups for RCTs. Where necessary for observational studies, we estimated the mean  
55  
56 and variance from the median, range, and sample size using methods which have been shown  
57  
58  
59  
60

1  
2  
3 to be reasonably robust in non-extreme circumstances[23]. Where necessary for RCTs, the  
4  
5 post-treatment means were derived from the within group changes and the control group  
6  
7 standard deviation carried forward from the baseline values[24]. Standardised mean  
8  
9 differences were calculated using Glass's Delta method. Exercise capacity outcomes included  
10  
11 any assessment of cardiorespiratory fitness and peripheral skeletal muscle strength. Where  
12  
13 multiple cardiorespiratory fitness outcomes were reported, first we chose peak VO<sub>2</sub>  
14  
15 measures, and then prioritized peak workload (power output) laboratory assessments of  
16  
17 cardiorespiratory fitness over field tests. Where multiple muscle strength outcomes were  
18  
19 reported, we prioritized peak isometric over peak dynamic measures; and knee extension over  
20  
21 other joint movements. HRQoL outcomes included any patient-reported assessment of health  
22  
23 status or functional disability. Where multiple HRQoL outcomes/scales were reported, first  
24  
25 we chose summed score scales, and then prioritized subscales that measure "fatigue"  
26  
27 symptoms, and the most frequently reported HRQoL outcome in the other studies reviewed.  
28  
29  
30  
31  
32  
33

### 34 **Data synthesis**

35  
36 Three reviewers (EA, BC and SS) independently collated and/or verified extracted data to  
37  
38 present a descriptive synthesis of important study characteristics and a quantitative synthesis  
39  
40 of effect estimates.  
41  
42  
43  
44

### 45 **Secondary outcomes**

46  
47 The secondary outcomes were data about adverse events reported in the RCTs for a  
48  
49 descriptive synthesis.  
50  
51  
52  
53

### 54 **Statistical methods**



1  
2  
3 We pooled and weighted studies first using random effects meta-analysis models, and  
4  
5 second using fixed effects models for verification[25]. Where necessary, we standardised  
6  
7 laboratory values for endogenous TT levels between observational studies using the  
8  
9 International System of Units (SI Units), expressed in nanomoles per litre (nmol/L). These  
10  
11 studies were then pooled to estimate the inverse variance weighted mean difference (WMD),  
12  
13 including the DerSimonian and Laird 95% confidence interval (95% CI), between cases and  
14  
15 controls. Where papers presented medians without means, we estimated the missing mean as  
16  
17 being equal to the median for meta-analysis[23].  
18  
19

20  
21 In examining the effects of testosterone treatment on exercise capacity and HRQoL  
22  
23 outcomes, the standardised mean difference (SMD) from each RCT were pooled to produce  
24  
25 an overall estimate of effect, and associated 95%CI, between treatment and control groups.  
26  
27 For each meta-analysis model, the degree of heterogeneity in SMDs was assessed by visual  
28  
29 inspection, the *I*-squared statistic (moderate being < 50%[26]) and the  $\chi^2$ -test of goodness of  
30  
31 fit[27]. Where evidence of heterogeneity was observed, we checked data extracted from  
32  
33 individual outlier studies, qualitatively investigated reasons for their different results, and  
34  
35 explored the effects of study exclusion in sensitivity analyses.  
36  
37

38  
39 We also used sensitivity analysis to investigate the robustness of the meta-analyses  
40  
41 models. We variously excluded RCTs in men and women, placebo only (rather than placebo  
42  
43 with exercise) controlled trials, longer duration trials ( $\geq 12$  weeks), and studies of lower  
44  
45 quality (score < 3.0 for observational studies; score < 5.0 for RCTs). And we repeated the  
46  
47 meta-analysis models using different cardiorespiratory fitness outcomes. Publication bias,  
48  
49 which reflects the tendency for smaller studies to be published in the literature only when  
50  
51 findings are positive, was assessed visually using funnel plots[28]. All calculations were  
52  
53 performed in Stata version 12 (StataCorp, College Station, TX, USA) using the 'metan'and  
54  
55  
56  
57  
58  
59  
60

1  
2  
3 'metafunnel' commands. A two-tailed  $P$ -value  $< 0.05$  was considered statistically significant  
4  
5 throughout the analyses.  
6  
7

## 8 9 **RESULTS**

10  
11 Figure 1 presents a flowchart summarising identification of potentially relevant studies,  
12 and those included and excluded (appendix page 8). Our search strategy identified 906  
13 citations after duplicates were removed. Of these, 865 citations were excluded after the first  
14 screening of titles and/or abstracts for inclusion and exclusion criteria, leaving 41 citations for  
15 a second full text screening. Hand searching the reference lists of these articles identified two  
16 additional potentially relevant citations. After further assessment of these 43 citations, 28  
17 were excluded for reasons listed in figure 1, leaving 15 for final inclusion in the systematic  
18 review. Most studies were excluded for inadequate predictor or outcome variables, or not  
19 having a control group (list of excluded citations; appendix pages 5-7).  
20  
21  
22  
23  
24  
25  
26  
27  
28  
29  
30  
31  
32  
33

### 34 **Descriptive data synthesis**

35  
36 Table 1 presents study characteristics of nine observational studies included for review,  
37 which were published between 1981 and 2011. Studies were conducted in Scotland[29, 30],  
38 Sweden[31], the United States[32], Taiwan[33], Greece[12], Turkey[13], Norway[34] and  
39 Belgium[35]. The degree of severity of airflow limitation in COPD cases ranged from mild to  
40 very severe, assessed according to the Global Initiative for Chronic Obstructive Lung Disease  
41 (GOLD) criteria[36] in four studies[12, 13, 33, 35], and by various spirometry criteria in  
42 four[29, 30, 32, 34] out of the five remaining studies. Control participants were recruited  
43 from primary care settings in six studies[12, 29, 30, 32, 33, 35]. The sample sizes ranged  
44 from 16 to 213, resulting in a total of 2918 participants across studies. Mean age of the  
45 samples ranged from 50 to 71 years. All of the observational studies were conducted in men.  
46  
47  
48  
49  
50  
51  
52  
53  
54  
55  
56  
57  
58  
59  
60

1  
2  
3 Mean quality scores ranged from 2.2 to 4.0, and four studies received a score of 3.0 or  
4  
5 higher[12, 13, 32, 34].  
6  
7  
8

9  
10 << Table 1 >>  
11  
12

13  
14 Table 2 presents study characteristics of six RCTs included for review, which were  
15  
16 published between 2003 and 2011. Studies were conducted in the United States[37], The  
17  
18 Netherlands[38], Brazil[39], France[16], Canada[40] and Norway[41]. Major inclusion  
19  
20 criteria were stable COPD or chronic respiratory failure in all studies, various spirometry  
21  
22 criteria in all but one study[16], low TT in only one study[37], and low body mass index in  
23  
24 only two studies[16, 39]. Major exclusion criteria were a range of chronic conditions in all  
25  
26 studies, prostatic conditions in four studies[16, 37, 39, 40], and elevated haemoglobin in one  
27  
28 study[37]. The sample sizes ranged from 16 to 122, resulting in a total of 287 participants  
29  
30 across studies. Mean age of the samples ranged from 66 to 69 years. All but two studies[16,  
31  
32 40] were conducted in men only. Baseline mean TT levels ranged from 9.6 to 21.6nmol/L for  
33  
34 men, and 0.42 to 0.45nmol/L for women as reported in one study[16]. Testosterone therapies  
35  
36 used were oral testosterone undecanoate in one study[16], oral stanozolol after a baseline  
37  
38 intramuscular injection of testosterone in another study[39], and intramuscular injections  
39  
40 (testosterone enanthate[37, 41] and nandrolone decanoate[38]) in all remaining studies. Four  
41  
42 studies investigated the combined effects of testosterone therapy with resistance training  
43  
44 (RT)[37] or pulmonary rehabilitation (PR)[16, 39, 40]. All but one study[16] used placebo  
45  
46 control conditions. Trial durations ranged from eight to 27 weeks. Primary outcomes were  
47  
48 peak muscle strength in five studies (from four citations[16, 37, 38, 40]), peak VO<sub>2</sub> in five  
49  
50 studies (from four citations[37-40]), peak workload in five studies (from four citations[16,  
51  
52 37, 38, 40]), six minute walking test (6MWT) in four studies[16, 39-41], and HRQoL in three  
53  
54  
55  
56  
57  
58  
59  
60

1  
2  
3 studies[16, 38, 40]. Mean quality scores ranged from 4.5 to 6.0, and all but one study[40]  
4  
5 received a score of 5.0 or higher.  
6  
7  
8

9  
10 << Table 2 >>  
11

## 12 13 14 **Quantitative data synthesis**

### 15 16 Effect of COPD exposure on endogenous TT level

17  
18 Figure 2 presents the WMD in endogenous TT level between the case and control groups  
19  
20 for observational studies (appendix page 9). Men with COPD had significantly lower levels  
21  
22 of TT compared with controls (pooled WMD was -3.21nmol/L [-5.18, -1.23]). There was a  
23  
24 high degree heterogeneity between studies ( $I$ -squared=81.9%,  $P$ <0.001) that was mostly a  
25  
26 result of variation in degree of deference rather than an unfavourable direction towards the  
27  
28 null. The sensitivity analyses presented in table 3 shows that the pooled WMD was  
29  
30 substantially changed after exclusion of lower quality studies (increased to -3.68 [-7.00, -  
31  
32 0.36]) and one large sample size study[34] (increased to -3.56 [-5.63, -1.49]). Finally, for the  
33  
34 one study[33] which provided both unadjusted mean differences and mean differences  
35  
36 adjusted for age, waist circumference and smoking status, a model using unadjusted rather  
37  
38 than adjusted values decreased the pooled WMD to -2.95 (-4.63, -1.27). In addition, a funnel  
39  
40 plot was produced and showed only slight evidence of publication bias, since the WMD in  
41  
42 TT was small (-0.60[33] and -1.10nmol/L[34]) for two of the largest studies (figure 3;  
43  
44 appendix page 10).  
45  
46  
47  
48  
49  
50  
51

52 << Table 3 >>  
53  
54  
55

### 56 Effect of testosterone therapy on exercise capacity and HRQoL outcomes 57 58 59 60

1  
2  
3 Figure 4 presents the SMD in peak muscle strength outcomes after testosterone therapy  
4 between the treatment and control groups for RCTs (appendix page 11). Testosterone  
5 therapies significantly improved standardised peak muscle strength outcomes compared with  
6 control conditions (pooled SMD was 0.31 [0.05, 0.56]), and there was little evidence of  
7 statistical heterogeneity between studies ( $I$ -squared=0.0%,  $P$ =0.839). The sensitivity analyses  
8 presented in table 4 shows that the pooled SMD was similar after exclusion of one lower  
9 quality study [40] (0.31 [0.04, 0.57]), but was substantially changed after exclusion of two  
10 placebo only controlled studies (no longer statistically significant 0.30 [-0.01, 0.62]), and the  
11 two studies in men and women that were also the two longer duration studies[16, 40]  
12 (decreased to 0.21 [-0.18, 0.60]). In addition, a funnel plot was produced and showed only  
13 slight evidence of publication bias, since the SMD in peak muscle strength outcomes was  
14 consistent in all but one treatment arm in one study[37] (figure 5; appendix page 12).  
15  
16  
17  
18  
19  
20  
21  
22  
23  
24  
25  
26  
27  
28  
29  
30  
31  
32

<< Table 4 >>

33  
34  
35  
36 Figure 6 presents the SMD in peak VO<sub>2</sub> outcomes after testosterone therapy between the  
37 treatment and control groups for RCTs (appendix page 13). Testosterone therapies  
38 consistently failed to show significant improvements in standardised peak VO<sub>2</sub> outcomes  
39 compared with control conditions (pooled SMD was 0.21 [-0.15, 0.56];  $I$ -squared=4.8%,  
40  $P$ =0.379). The sensitivity analyses presented in table 5 shows that this null effect was similar  
41 after exclusion of one lower quality study[40] (0.13 [-0.27, 0.54]), two placebo only  
42 controlled studies (0.03 [-0.60, 0.66]), one study in men and women[40] (0.13 [-0.27, 0.54]),  
43 and two longer duration studies[39, 40] (0.27 [-0.12, 0.67]), and in the model using 6MWT  
44 outcomes (0.10 [-0.34, 0.53]). Conversely, testosterone therapies significantly improved  
45 cardiorespiratory fitness in the model using peak workload rather than peak VO<sub>2</sub> outcomes  
46  
47  
48  
49  
50  
51  
52  
53  
54  
55  
56  
57  
58  
59  
60

(pooled SMD was 0.27 [0.01, 0.52]), and there was little evidence of statistical heterogeneity between studies ( $I$ -squared=0.0%,  $P$ =0.741).

<< Table 5 >>

Figure 7 presents the SMD in peak HRQoL outcomes after testosterone therapy between the treatment and control groups for RCTs (appendix page 14). Testosterone therapies consistently failed to show better standardised HRQoL outcomes compared with control conditions (pooled SMD was -0.03 [-0.32, 0.25];  $I$ -squared=0.0%,  $P$ =0.934). The sensitivity analyses showed that this null effect was comparable in the fixed effect model (-0.03 [-0.32, 0.25]) and after exclusion of one lower quality study[40] (-0.04 [-0.34, 0.25]).

#### Adverse events

Two RCTs showed that testosterone therapy was associated with more serious adverse events compared with the control group. One study reported an increased number of exacerbations during short-term, but not long-term, follow-up[16], and another study reported that two of three COPD patients with respiratory failure in the treatment group had died[38]. Conversely, one study reported that more patients died of respiratory failure in the control group[39]. Four studies showed that testosterone therapies decreased gonadotrophin levels compared with controls, as can be expected[16, 37, 39, 41]. Compared with controls, testosterone therapy was associated with a decrease in sex hormone-binding globulin level in two studies[16, 41], and a decrease in oestradiol level in men in another study[16]. Finally, few studies showed that testosterone therapy was associated with relative increases in haemoglobin or haematocrit[16, 37, 38]; creatinine, aspartate aminotransferase and lactate dehydrogenase values[38].

## DISCUSSION

### Summary of evidence

We have established that men with COPD have significantly lower levels of endogenous TT compared with controls (weighted mean difference was -3.21nmol/L [-5.18, -1.23]). The size of the mean difference in TT level, which ranks men with COPD in the second quartile (below average) compared with age-matched population norms[9], is likely to be clinically relevant. For instance, comparable or greater differences in TT levels between cases and controls have been reported in studies on risk of type 2 diabetes (WMD was -2.66nmol/L [-3.45, -1.86])[42], metabolic syndrome (WMD was -2.64nmol/L [-2.95, -2.32])[43], and clinically significant depression (median difference was -1.21nmol/L,  $P<0.001$  for Mann-Whitney test)[44]. These comorbidities have been shown to adversely affect COPD prognosis[45-47], and would further complicate COPD management. As the effect of COPD exposure on TT level increased in size after exclusion of lower quality studies and one large sample size study, future higher quality studies will likely strengthen rather than weaken this evidence base. Collectively, our results and the existing literature indicate that testosterone deficiency should be considered in men with COPD.

Based on limited short-term RCT evidence in predominately male COPD patients, our results suggest that testosterone therapy significantly improves several exercise capacity outcomes. The size of the effect of testosterone therapy that can be expected in practice is small to moderate, but comparable to exercise or pulmonary rehabilitation therapies alone[7, 8]. The effect of testosterone therapy on standardised muscle strength outcomes remained robust after exclusion of one lower quality study, but weakened after exclusion of two placebo only studies. This supports the hypothesis that testosterone therapy with exercise is more effective than testosterone therapy alone for functional improvements[48]. In addition,

our results suggest that the mechanism for improvement in cardiorespiratory fitness assessed by peak workload is likely explained by better exercise tolerance due to testosterone-induced increases in muscle strength rather than changes in VO<sub>2</sub>.

### Limitations

Several limitations require careful consideration. Since only a small number of studies conducted in specific populations were included, the findings of this review may not be relevant to other countries and key groups, requiring further research. In particular, most of the RCTs were conducted in COPD patients without cardiovascular disease and/or diabetes or endocrine disease, which are highly prevalent in this population group[46]. Second, we replaced missing data points with estimates in some instances, introducing further uncertainty. This includes both estimating the mean from the median and range and carrying forward the pre-intervention standard deviation of control groups where the post-intervention statistic was not available. Third, because only a few RCTs targeted COPD patients who would have theoretically benefited most from testosterone therapy such as those with low testosterone or body weight[16, 37, 39], our estimated effect size for improvement in standardised exercise capacity may have been underestimated. Finally, reviewer-level limitations include incomplete retrieval of information for several of the 28 citations excluded, and the existence of other relevant studies not identified with our search strategy resulting in selection bias. However, the results and conclusions reported in most of the excluded studies were in line with those reported here, selection bias was unlikely.

Nevertheless, our systematic analysis of the existing literature revealed that there is an absence of sufficient RCT evidence to draw firm conclusions about the long-term benefits and risks of testosterone therapies for exercise capacity and HRQoL outcomes in male or female COPD patients, or about the pharmacological dosing for specific testosterone



1  
2  
3 therapies needed for effectiveness. Reliable information on the efficacy and safety, as well as  
4  
5 cost-effectiveness, of specific testosterone therapies is required to inform clinical practice  
6  
7 guidelines for COPD. In addition, future high quality epidemiological research is needed to  
8  
9 determine which subgroups of COPD patients are most vulnerable to testosterone deficiency,  
10  
11 and to reliably establish whether women with COPD likewise present with significantly  
12  
13 lower levels of TT than controls.  
14  
15

### 16 17 18 **Conclusions** 19

20  
21 Men with COPD have clinically relevant lower than normal endogenous TT levels, and we  
22  
23 believe that our meta-analytic results are sufficiently reliable to recommend that clinicians  
24  
25 should consider testosterone deficiency in these patients. Although our results also suggest  
26  
27 that testosterone therapy improves several exercise capacity outcomes, there is an absence of  
28  
29 sufficient RCT evidence to draw firm conclusions about the long-term benefits and risks of  
30  
31 testosterone therapy for exercise capacity and HRQoL outcomes in male or female COPD  
32  
33 patients.  
34  
35  
36  
37

### 38 **Figure legends** 39

40  
41 Figure 1 presents flowchart summarising identification of studies included for review.  
42

43  
44 Figure 2 presents the WMD in endogenous TT level between the case and control groups for  
45  
46 observational studies.  
47

48  
49 Figure 3 presents a funnel plot assessing symmetry of the WMD in TT level between the case  
50  
51 and control groups for observational studies.  
52

53  
54 Figure 4 presents the SMD in peak muscle strength outcomes after testosterone therapy  
55  
56 between the treatment and control groups for RCTs.  
57  
58  
59  
60

1  
2  
3 Figure 5 presents a funnel plot assessing symmetry of the SMD in peak muscle strength  
4 outcomes after testosterone treatment between the treatment and control groups for RCTs.  
5  
6

7  
8 Figure 6 presents the SMD in peak VO2 outcomes after testosterone therapy between the  
9 treatment and control groups for RCTs.  
10

11  
12 Figure 7 presents the SMD in peak HRQoL outcomes after testosterone therapy between the  
13 treatment and control groups for RCTs  
14  
15

## 16 17 18 19 20 21 **ACKNOWLEDGMENTS**

22  
23 Authorship order is according to percentage contribution. EA is guarantor of the paper, taking  
24 responsibility for the integrity of the work as a whole, from inception to published article. EA  
25 conceived and designed the review, identified studies for inclusion, extracted and interpreted  
26 data, and drafted the article. PF analysed and interpreted data, and revised the article. BC and  
27 SS extracted and interpreted data, and revised the article. GW interpreted data, and revised  
28 the article. All authors approved the final completed article. We are grateful to Mr Geoffrey  
29 Lattimore for his work on developing and conducting the electronic database searches.  
30  
31  
32  
33  
34  
35  
36  
37  
38  
39  
40

## 41 **COMPETING INTERESTS**

42  
43 EA has entered financial agreements to speak at events for Eli Lilly Australia Pty Ltd (Lilly).  
44 BC has received speaking fees and/or conference support from GSK, Novartis and  
45 Boehringer Ingelheim. GW has received speaking fees and research support from Bayer; is  
46 on International and National advisory boards for and has received research support from  
47 Lilly; and has received consulting fees and research support from Lawley pharmaceuticals.  
48  
49  
50  
51  
52  
53  
54  
55  
56

## 57 **CONTRIBUTORSHIP**

1  
2  
3 Authorship order is according to percentage contribution. EA is guarantor of the paper, taking  
4 responsibility for the integrity of the work as a whole, from inception to published article. EA  
5 conceived and designed the review, identified studies for inclusion, extracted and interpreted  
6 data, and drafted the article. PF analysed and interpreted data, and revised the article. BC and  
7 SS extracted and interpreted data, and revised the article. GW interpreted data, and revised  
8 the article. All authors approved the final completed article. We are grateful to Mr Geoffrey  
9 Lattimore for his work on developing and conducting the electronic database searches.  
10  
11  
12  
13  
14  
15  
16  
17  
18  
19

## 20 21 **DATA SHARING**

22 No additional data available.  
23  
24  
25  
26

## 27 28 **FUNDING**

29 None  
30  
31  
32  
33  
34  
35  
36  
37  
38  
39  
40  
41  
42  
43  
44

## 45 46 **REFERENCES**

- 47 1. Vos T, Flaxman AD, Naghavi M, *et al.* Years lived with disability (YLDs) for 1160  
48 sequelae of 289 diseases and injuries 1990?2010: a systematic analysis for the Global  
49 Burden of Disease Study 2010. *The Lancet.* 2012;380(9859):2163-96.  
50  
51
- 52 2. Cazzola M, MacNee W, Martinez FJ, *et al.* Outcomes for COPD pharmacological  
53 trials: from lung function to biomarkers. *Eur Respir J.* 2008 Feb;31(2):416-69.  
54  
55  
56  
57  
58  
59  
60

- 1  
2  
3 3. Jones PW. Health status measurement in chronic obstructive pulmonary disease.  
4  
5 Thorax. 2001 Nov;56(11):880-7.  
6
- 7  
8 4. Marin JM, Cote CG, Diaz O, *et al.* Prognostic assessment in COPD: health related  
9  
10 quality of life and the BODE index. Respir Med. 2011 Jun;105(6):916-21.  
11
- 12  
13 5. Hamilton AL, Killian KJ, Summers E, *et al.* Muscle strength, symptom intensity, and  
14  
15 exercise capacity in patients with cardiorespiratory disorders. Am J Respir Crit Care  
16  
17 Med. 1995 Dec;152(6 Pt 1):2021-31.  
18
- 19  
20 6. Nici L, Donner C, Wouters E, *et al.* American Thoracic Society/European Respiratory  
21  
22 Society statement on pulmonary rehabilitation. Am J Respir Crit Care Med. 2006 Jun  
23  
24 15;173(12):1390-413.  
25
- 26  
27 7. O'Shea SD, Taylor NF, Paratz JD. Progressive resistance exercise improves muscle  
28  
29 strength and may improve elements of performance of daily activities for people with  
30  
31 COPD: a systematic review. Chest. 2009 Nov;136(5):1269-83.  
32
- 33  
34 8. COPD Working Group. Pulmonary Rehabilitation for Patients With Chronic  
35  
36 Pulmonary Disease (COPD): An Evidence-Based Analysis. Ontario Health  
37  
38 Technology Assessment Series. 2012;12(6):1-75.  
39
- 40  
41 9. Atlantis E, Martin SA, Haren MT, *et al.* Demographic, physical and lifestyle factors  
42  
43 associated with androgen status: the Florey Adelaide Male Ageing Study (FAMAS).  
44  
45 Clin Endocrinol (Oxf). 2009 Aug;71(2):261-72.  
46
- 47  
48 10. Jankowska EA, Filippatos G, Ponikowska B, *et al.* Reduction in circulating  
49  
50 testosterone relates to exercise capacity in men with chronic heart failure. J Card Fail.  
51  
52 2009 Jun;15(5):442-50.  
53  
54  
55  
56  
57  
58  
59  
60

11. Ravaglia G, Forti P, Maioli F, *et al.* Dehydroepiandrosterone-sulfate serum levels and common age-related diseases: results from a cross-sectional Italian study of a general elderly population. *Exp Gerontol.* 2002 May;37(5):701-12.
12. Kaparianos A, Argyropoulou E, Efremidis G, *et al.* Sex hormone alterations and systemic inflammation in a group of male COPD smokers and their correlation with the +138 insA/delA endothelin-1 gene polymorphism. A case-control study. *Eur Rev Med Pharmacol Sci.* 2011 Oct;15(10):1149-57.
13. Karadag F, Ozcan H, Karul AB, *et al.* Correlates of erectile dysfunction in moderate-to-severe chronic obstructive pulmonary disease patients. *Respirology.* 2007 Mar;12(2):248-53.
14. Laghi F, Adiguzel N, Tobin MJ. Endocrinological derangements in COPD. *European Respiratory Journal.* 2009;34(4):975-96.
15. Toma M, McAlister FA, Coglianese EE, *et al.* Testosterone supplementation in heart failure: a meta-analysis. *Circ Heart Fail.* 2012 May 1;5(3):315-21.
16. Pison CM, Cano NJ, Cherion C, *et al.* Multimodal nutritional rehabilitation improves clinical outcomes of malnourished patients with chronic respiratory failure: a randomised controlled trial. *Thorax.* 2011 Nov;66(11):953-60.
17. Katznelson L, Robinson MW, Coyle CL, *et al.* Effects of modest testosterone supplementation and exercise for 12 weeks on body composition and quality of life in elderly men. *Eur J Endocrinol.* 2006 Dec;155(6):867-75.
18. Pugh PJ, Jones TH, Channer KS. Acute haemodynamic effects of testosterone in men with chronic heart failure. *Eur Heart J.* 2003 May;24(10):909-15.

- 1  
2  
3 19. Fernandez-Balsells MM, Murad MH, Lane M, *et al.* Clinical review 1: Adverse  
4 effects of testosterone therapy in adult men: a systematic review and meta-analysis. J  
5 Clin Endocrinol Metab. 2010 Jun;95(6):2560-75.  
6  
7
- 8  
9  
10 20. Caminiti G, Volterrani M, Iellamo F, *et al.* Effect of long-acting testosterone  
11 treatment on functional exercise capacity, skeletal muscle performance, insulin  
12 resistance, and baroreflex sensitivity in elderly patients with chronic heart failure a  
13 double-blind, placebo-controlled, randomized study. J Am Coll Cardiol. 2009 Sep  
14 1;54(10):919-27.  
15  
16
- 17  
18  
19 21. CRD's guidance for undertaking reviews in health care. © Centre for Reviews and  
20 Dissemination University of York 2008 Published by CRD 2009.  
21  
22
- 23  
24  
25 22. Schulz KF, Altman DG, Moher D. CONSORT 2010 statement: updated guidelines for  
26 reporting parallel group randomised trials. BMJ. 2010;340:c332.  
27  
28
- 29  
30  
31 23. Hozo SP, Djulbegovic B, Hozo I. Estimating the mean and variance from the median,  
32 range, and the size of a sample. BMC Med Res Methodol. 2005;5:13.  
33  
34
- 35  
36  
37 24. Higgins JPT, Green S. *Cochrane Handbook for Systematic Reviews of Interventions*  
38 Version 5.1.0 [updated March 2011]. The Cochrane Collaboration, 2011 Available  
39 from [www.cochrane-handbook.org](http://www.cochrane-handbook.org) [serial on the Internet]. editors.  
40  
41
- 42  
43  
44 25. DerSimonian R, Laird N. Meta-analysis in clinical trials. Control Clin Trials. 1986  
45 Sep;7(3):177-88.  
46  
47
- 48  
49  
50 26. Higgins JP, Thompson SG, Deeks JJ, *et al.* Measuring inconsistency in meta-analyses.  
51 BMJ. 2003 Sep 6;327(7414):557-60.  
52  
53
- 54  
55  
56 27. Higgins JP, Thompson SG. Quantifying heterogeneity in a meta-analysis. Stat Med.  
57 2002 Jun 15;21(11):1539-58.  
58  
59  
60

- 1  
2  
3 28. Egger M, Davey Smith G, Schneider M, *et al.* Bias in meta-analysis detected by a  
4 simple, graphical test. *BMJ*. 1997 Sep 13;315(7109):629-34.  
5  
6  
7  
8 29. Gow SM, Seth J, Beckett GJ. Thyroid function and endocrine abnormalities in elderly  
9 patients with severe chronic obstructive lung disease. *Thorax*. 1987;42(7):520-5.  
10  
11  
12 30. Semple PD, Beastall GH, Watson WS, *et al.* Hypothalamic-pituitary dysfunction in  
13 respiratory hypoxia. *Thorax*. 1981 Aug;36(8):605-9.  
14  
15  
16  
17 31. Bratel T, Wennlund A, Carlstrom K. Impact of hypoxaemia on neuroendocrine  
18 function and catecholamine secretion in chronic obstructive pulmonary disease  
19 (COPD). Effects of long-term oxygen treatment. *Respir Med*. 2000 Dec;94(12):1221-  
20 8.  
21  
22  
23  
24  
25  
26 32. Iqbal F, Michaelson J, Thaler L, *et al.* Declining bone mass in men with chronic  
27 pulmonary disease. Contribution of glucocorticoid treatment, body mass index, and  
28 gonadal function. *Chest*. 1999;116(6):1616-24.  
29  
30  
31  
32  
33 33. Hsu AH, Chen DY, Lee JJ. Serum testosterone levels in patients with chronic  
34 obstructive pulmonary disease. *Tzu Chi Medical Journal*. 2006;18(2):113-20+62.  
35  
36  
37  
38 34. Svartberg J, Schirmer H, Medbo A, *et al.* Reduced pulmonary function is associated  
39 with lower levels of endogenous total and free testosterone. The Tromso study. *Eur J*  
40 *Epidemiol*. 2007;22(2):107-12.  
41  
42  
43  
44  
45 35. Van Vliet M, Spruit MA, Verleden G, *et al.* Hypogonadism, quadriceps weakness,  
46 and exercise intolerance in chronic obstructive pulmonary disease. *American Journal*  
47 *of Respiratory & Critical Care Medicine*. 2005;172(9):1105-11.  
48  
49  
50  
51 36. Global Initiative for Chronic Obstructive Lung Disease. Global Strategy for the  
52 Diagnosis, Management, and Prevention of Chronic Obstructive Pulmonary Disease  
53 (Revised 2011). 2011.  
54  
55  
56  
57  
58  
59  
60

- 1  
2  
3 37. Casaburi R, Bhasin S, Cosentino L, *et al.* Effects of testosterone and resistance  
4 training in men with chronic obstructive pulmonary disease. *Am J Respir Crit Care*  
5 *Med.* 2004 Oct 15;170(8):870-8.  
6  
7  
8  
9  
10 38. Creutzberg EC, Wouters EF, Mostert R, *et al.* A role for anabolic steroids in the  
11 rehabilitation of patients with COPD? A double-blind, placebo-controlled,  
12 randomized trial. *Chest.* 2003 Nov;124(5):1733-42.  
13  
14  
15  
16  
17 39. Ferreira IM, Verreschi IT, Nery LE, *et al.* The influence of 6 months of oral anabolic  
18 steroids on body mass and respiratory muscles in undernourished COPD patients.  
19 *Chest.* 1998 Jul;114(1):19-28.  
20  
21  
22  
23  
24 40. Sharma S, Arneja A, McLean L, *et al.* Anabolic steroids in COPD: a review and  
25 preliminary results of a randomized trial. *Chron Respir Dis.* 2008;5(3):169-76.  
26  
27  
28 41. Svartberg J, Aasebo U, Hjalmsen A, *et al.* Testosterone treatment improves body  
29 composition and sexual function in men with COPD, in a 6-month randomized  
30 controlled trial. *Respir Med.* 2004 Sep;98(9):906-13.  
31  
32  
33  
34  
35 42. Ding EL, Song Y, Malik VS, *et al.* Sex differences of endogenous sex hormones and  
36 risk of type 2 diabetes: a systematic review and meta-analysis. *JAMA.* 2006 Mar  
37 15;295(11):1288-99.  
38  
39  
40  
41  
42 43. Brand JS, van der Tweel I, Grobbee DE, *et al.* Testosterone, sex hormone-binding  
43 globulin and the metabolic syndrome: a systematic review and meta-analysis of  
44 observational studies. *Int J Epidemiol.* 2011 Feb;40(1):189-207.  
45  
46  
47  
48  
49 44. Almeida OP, Yeap BB, Hankey GJ, *et al.* Low free testosterone concentration as a  
50 potentially treatable cause of depressive symptoms in older men. *Arch Gen*  
51 *Psychiatry.* 2008 Mar;65(3):283-9.  
52  
53  
54  
55  
56  
57  
58  
59  
60



- 1  
2  
3 45. Atlantis E, Fahey P, Cochrane B, *et al.* Bidirectional associations between clinically  
4 relevant depression or anxiety and chronic obstructive pulmonary disease (COPD): a  
5 systematic review and meta-analysis. CHEST.in press.  
6  
7  
8  
9  
10 46. Almagro P, Cabrera FJ, Diez J, *et al.* Comorbidities and short-term prognosis in  
11 patients hospitalized for acute exacerbation of COPD. The ESMI study. Chest. 2012  
12 Apr 5.  
13  
14  
15  
16 47. Kupeli E, Ulubay G, Ulasli SS, *et al.* Metabolic Syndrome is associated with  
17 increased risk of acute exacerbation of COPD: a preliminary study. Endocrine. 2010  
18 Aug;38(1):76-82.  
19  
20  
21  
22  
23 48. Guo W, Wong S, Li M, *et al.* Testosterone plus low-intensity physical training in late  
24 life improves functional performance, skeletal muscle mitochondrial biogenesis, and  
25 mitochondrial quality control in male mice. PLoS One. 2012;7(12):e51180.  
26  
27  
28  
29  
30  
31  
32  
33  
34  
35  
36  
37  
38  
39  
40  
41  
42  
43  
44  
45  
46  
47  
48  
49  
50  
51  
52  
53  
54  
55  
56  
57  
58  
59  
60

TABLE 1: Characteristics of observational studies reviewed

| Study identification                 | Country       | Participants                                                                                     |                                                                                                   | Sample size | Sex | Mean age (years) | Mean (SD) or median* (range) total testosterone, nmol/L |          |       |          | Covariate considerations (adjusted/excluded/matched)                                                                                                                                                                                           | Quality score (out of 5) |
|--------------------------------------|---------------|--------------------------------------------------------------------------------------------------|---------------------------------------------------------------------------------------------------|-------------|-----|------------------|---------------------------------------------------------|----------|-------|----------|------------------------------------------------------------------------------------------------------------------------------------------------------------------------------------------------------------------------------------------------|--------------------------|
|                                      |               | Cases, assessment                                                                                | Controls                                                                                          |             |     |                  | Cases                                                   | Controls |       |          |                                                                                                                                                                                                                                                |                          |
| Bratel et al, 2000 <sup>31</sup>     | Sweden        | COPD with severe airway obstruction and daytime hypoxaemia, not reported                         | Age-matched "healthy" participants                                                                | 32          | M   | 69               | 14.3                                                    | 6.9      | 17.9  | 6.9      | Age                                                                                                                                                                                                                                            | 1.2                      |
| Gow et al, 1987 <sup>29</sup>        | Scotland      | COPD, spirometry FEV1 <40% and FVC <65% predicted                                                | Inpatients ready for discharge                                                                    | 26          | M   | 70               | 10.7                                                    | 3.0-19.5 | 11.0  | 1.8-21.9 | Age, thyroid disease, oral corticosteroids                                                                                                                                                                                                     | 2.9                      |
| Iqbal et al, 1999 <sup>32</sup>      | United States | Chronic lung disease, predominantly spirometry FEV1/FVC <80% predicted                           | Primary care clinic patients without history of chronic lung disease or corticosteroid treatments | 85          | M   | 62               | 11.1                                                    | 9.8      | 14.0  | 8.6      | Age, ethnicity, BMI, physical activity, smoking status, caffeine and alcohol consumption, thyroid and rheumatologic conditions, medications including glucocorticoids, testosterone, and for osteoporosis                                      | 4.0                      |
| Hsu et al, 2006 <sup>33</sup>        | Taiwan        | Chronic bronchitis and COPD, GOLD criteria stage 1-4                                             | Outpatients with stable urolithiasis or prostatitis                                               | 213         | M   | 71               | 14.7                                                    | 7.7      | 15.3  | 6.4      | Age, chronic diseases including treated benign prostate hyperplasia, other chronic lung disease, exacerbation                                                                                                                                  | 2.9                      |
| Kaparianos et al, 2011 <sup>12</sup> | Greece        | COPD, GOLD criteria mean FEV1 54%, mean FEV1/FVC 59%                                             | Outpatient smokers                                                                                | 125         | M   | 61               | 11.2                                                    | 4.4      | 18.4  | 4.5      | Age, ethnicity, BMI, smoking, chronic diseases, endothelin-1 pro-inflammatory allele, other chronic lung diseases, medications including β2-adrenergic agonists, corticosteroids, follicle stimulating hormone, erythrocyte sedimentation rate | 3.5                      |
| Karadag et al, 2007 <sup>13</sup>    | Turkey        | COPD, GOLD criteria stage 2-3                                                                    | Age-matched participants                                                                          | 125         | M   | 63               | 13.2                                                    | 5.5      | 16.6  | 5.5      | Age, sexual partner status, BMI, medications that interfere with sex hormones, chronic diseases, treated urogenital disease, aged ≥75 years, regular systemic corticosteroids, oestradiol, tumor necrosis factor-alpha                         | 3.0                      |
| Semple et al, 1981 <sup>30</sup>     | Scotland      | COPD, spirometry FEV1 and FEV1/FVC <70%                                                          | Age-matched inpatients                                                                            | 16          | M   | 50               | 13.1                                                    | 4.4      | 20.3  | 5.4      | Age                                                                                                                                                                                                                                            | 2.7                      |
| Svartberg et al, 2007 <sup>34</sup>  | Norway        | Representative population with COPD, spirometry FEV1 <50% predicted with FEV1/FVC <70% predicted | Representative population with spirometry FEV1 ≥50% predicted                                     | 2197        | M   | 66               | 12.7                                                    | 5.3      | 14.0  | 5.5      | Age, waist circumference, smoking status                                                                                                                                                                                                       | 3.6                      |
| Van Vliet et al,                     | Belgium       | COPD, GOLD criteria stage 1-4                                                                    | Outpatients with normal                                                                           | 99          | M   | 65               | 9.0*                                                    | 6.8-12.9 | 12.3* | 8.8-16.2 | Age, BMI, calculated low free                                                                                                                                                                                                                  | 2.9                      |

2005<sup>35</sup>

lung function

testosterone, sex hormone binding  
globulin

---

Abbreviations: COPD, chronic obstructive pulmonary disease; M, men; GOLD, Global Initiative for Chronic Obstructive Lung Disease; BTS, British Thoracic Society; FEV1, forced expiratory volume in one second; FVC, forced vital capacity; BMI, body mass index; Matched, considered if between-group difference in characteristic was not likely statistically significant ( $P<0.05$ );

---

For peer review only

TABLE 2: Characteristics of randomised controlled trials reviewed

adjacent.....continued →

| Study identification                 | Country         | Sample size | Population                                                                                                                                                                                                                  | Sex (M/W)                                                                                                                                                                                                                        | Mean age (years) | Baseline mean total testosterone, nmol/L |                       |                      |
|--------------------------------------|-----------------|-------------|-----------------------------------------------------------------------------------------------------------------------------------------------------------------------------------------------------------------------------|----------------------------------------------------------------------------------------------------------------------------------------------------------------------------------------------------------------------------------|------------------|------------------------------------------|-----------------------|----------------------|
|                                      |                 |             | Major inclusion criteria                                                                                                                                                                                                    | Major exclusion criteria                                                                                                                                                                                                         |                  | Treated                                  | Controls              |                      |
| Casaburi et al, 2004 <sup>37</sup>   | United States   | 47          | Stable COPD, spirometry FEV1 $\leq$ 60% predicted and FEV1/VC $\leq$ 60%; total testosterone $\leq$ 13.9nmol/L                                                                                                              | CVD, low or high bodyweight, prostatic indications, haemoglobin $\geq$ 16g/dL, orthopaedic impairments                                                                                                                           | M                | 67                                       | (a) 10.5;<br>(b) 14.1 | (a) 10.5;<br>(b) 9.6 |
| Creutzberg et al, 2003 <sup>38</sup> | The Netherlands | 56          | Stable COPD, ATS criteria, spirometry FEV1 $<$ 70% predicted and increase in FEV1 $<$ 10% post bronchodilation                                                                                                              | Obesity, malignancies, CVD, gastro-intestinal inflammatory disorders, type 1 diabetes, oxygen dependency at rest                                                                                                                 | M                | 66                                       | 13.4                  | 14.6                 |
| Ferreira et al, 1998 <sup>39</sup>   | Brazil          | 17          | Ambulatory and stable COPD, spirometry maximal inspiratory pressure $<$ 60% predicted and BMI $<$ 20kg/m <sup>2</sup>                                                                                                       | CVD, prostatic indications                                                                                                                                                                                                       | M                | 69                                       | 14.4                  | 17.2                 |
| Pison et al, 2011 <sup>16</sup>      | France          | 122         | Stable CRF, $>$ 18 years, PaO <sub>2</sub> $\leq$ 8kPa, long-term oxygen therapy and/or home mechanical ventilation $>$ three months, BMI $\leq$ 21kg/m <sup>2</sup> or fat-free mass index $<$ 25 <sup>th</sup> percentile | Pulmonary hypertension, sleep apnoea, prostatic indications, neuromuscular diseases, cystic fibrosis, conditions compromising six month survival, hormone-dependent cancer, women of childbearing age, elevated aminotransferase | M/W              | 66                                       | M 12.7;<br>W 0.45     | M 13.6;<br>W 0.42    |
| Sharma et al, 2008 <sup>40</sup>     | Canada          | 16          | Stable COPD, GOLD criteria stage 3-4, spirometry FEV1 $<$ 50% predicted and FEV1/FVC $<$ 0.7                                                                                                                                | History of asthma, obesity, malignancy, CVD, prostatic indications, renal, hepatic, gastrointestinal or endocrine disease, recent surgery $\leq$ two months                                                                      | M/W              | 68                                       | M NR                  | W NR                 |
| Svartberg et al, 2004 <sup>41</sup>  | Norway          | 29          | Stable COPD, moderate to severe, spirometry FEV1 $<$ 60% predicted                                                                                                                                                          | Asthma, malignancies, CVD, hepatic or endocrine disease                                                                                                                                                                          | M                | 66                                       | 21.6                  | 20.5                 |

Abbreviations: COPD, chronic obstructive pulmonary disease; CVD, cardiovascular diseases; CRF, chronic respiratory failure; GOLD, Global Initiative for Chronic Obstructive Lung Disease; ATS, American Thoracic Society; FEV1, forced expiratory volume in one second; FVC, forced vital capacity; M, men; W, women; IM, intramuscular injection; RT, resistance training; PR, pulmonary rehabilitation; IRM, one repetition maximum; VO<sub>2</sub>, volume of oxygen uptake; HRQoL, health-related quality of life; 6MWT, six minute walking test; CRQ, chronic respiratory questionnaire; NR, not reported

→ adjacent.....continued

| Treatments                                                                                              | Control conditions                                                   | Trial duration (weeks) | Outcomes (assessments, units)                                                                                                                                                                                       | Quality score (out of 8) |
|---------------------------------------------------------------------------------------------------------|----------------------------------------------------------------------|------------------------|---------------------------------------------------------------------------------------------------------------------------------------------------------------------------------------------------------------------|--------------------------|
| (a) Testosterone enanthate, 100mg per week IM;<br>(b) Testosterone enanthate, 100mg per week IM with RT | (a) Placebo;<br>(b) Placebo with RT                                  | 10                     | Muscle strength (leg press, 1RM kg); Cardiorespiratory fitness (bicycle, peak VO <sub>2</sub> L/min and peak workload Watts)                                                                                        | 5.0                      |
| Nandrolone decanoate, 50mg per two weeks IM                                                             | Placebo                                                              | 8                      | Muscle strength (knee extension, peak isometric force Newtons); Cardiorespiratory fitness (bicycle, peak workload Watts and peak VO <sub>2</sub> ml/min); HRQoL (SGRQ total score)                                  | 6.0                      |
| Testosterone, 250mg IM at baseline and oral stanozolol, 12mg per day with PR                            | Placebo with PR nine to 27 weeks                                     | 27                     | Cardiorespiratory fitness (bicycle, peak VO <sub>2</sub> % predicted; 6MWT, distance metres)                                                                                                                        | 5.0                      |
| Oral testosterone undecanoate, M 80mg/W 40mg twice daily with PR                                        | Home education on self-management of COPD-related stress and anxiety | 13                     | Muscle strength (knee extension, peak isometric force Newtons); Cardiorespiratory fitness (6MWT, distance metres; bicycle, peak workload Watts); HRQoL (CRQ total score)                                            | 5.0                      |
| Nandrolone decanoate, M 50mg/W 25mg per two weeks IM with PR                                            | Placebo with PR                                                      | 16                     | Muscle strength (knee extension, peak isometric force units NR); Cardiorespiratory fitness (bicycle, peak VO <sub>2</sub> % predicted and peak workload Watts; 6MWT, distance metres); HRQoL (CRQ fatigue subscore) | 4.5                      |
| Testosterone enanthate, 250mg per four weeks IM                                                         | Placebo                                                              | 26                     | Cardiorespiratory fitness (6MWT, distance metres)                                                                                                                                                                   | 5.5                      |

1  
2  
3  
4  
5  
6  
7  
8  
9  
10  
11  
12  
13  
14  
15  
16  
17  
18  
19  
20  
21  
22  
23  
24  
25  
26  
27  
28  
29  
30  
31  
32  
33  
34  
35  
36  
37  
38  
39  
40  
41  
42  
43  
44  
45  
46  
47  
48  
49

**TABLE 3: Sensitivity analysis of observational studies on COPD exposure → total testosterone outcome meta-analysis**

|                                                                 | <i>N</i><br>studies | <i>N</i><br>sample | Total testosterone<br>WMD | (95% confidence<br>interval) | <i>P</i> -value for<br>heterogeneity |
|-----------------------------------------------------------------|---------------------|--------------------|---------------------------|------------------------------|--------------------------------------|
| Fixed effects model                                             | 9                   | 2918               | -3.00                     | (-3.75, -2.26)               | <0.001                               |
| Exclusion of five lower quality studies (score <3.0)            | 4                   | 2532               | -3.68                     | (-7.00, -0.36)               | <0.001                               |
| Model using unadjusted rather than adjusted values in one study | 9                   | 2918               | -2.95                     | (-4.63, -1.27)               | <0.001                               |
| Exclusion of a large sample size study                          | 8                   | 721                | -3.56                     | (-5.63, -1.49)               | <0.001                               |

Abbreviations: N, number; WMD, weighted mean difference

**TABLE 4: Sensitivity analysis of randomised controlled trials on testosterone treatment → muscle strength outcomes meta-analysis**

|                                                             | <i>N</i> studies | <i>N</i> sample | SMD  | (95% confidence interval) | <i>P</i> -value for heterogeneity |
|-------------------------------------------------------------|------------------|-----------------|------|---------------------------|-----------------------------------|
| Fixed effects model                                         | 5                | 241             | 0.31 | (0.05, 0.56)              | 0.839                             |
| Exclusion of one lower quality study (score <5.0)           | 4                | 225             | 0.31 | (0.04, 0.57)              | 0.699                             |
| Exclusion of two placebo only control studies               | 3                | 161             | 0.30 | (-0.01, 0.62)             | 0.491                             |
| Exclusion of two studies in men and women                   | 3                | 103             | 0.21 | (-0.18, 0.60)             | 0.611                             |
| Exclusion of two longer duration studies ( $\geq 12$ weeks) | 3                | 103             | 0.21 | (-0.18, 0.60)             | 0.611                             |

Abbreviations: N, number; SMD, standardised mean difference

1  
2  
3  
4  
5  
6  
7  
8  
9  
10  
11  
12  
13  
14  
15  
16  
17  
18  
19  
20  
21  
22  
23  
24  
25  
26  
27  
28  
29  
30  
31  
32  
33  
34  
35  
36  
37  
38  
39  
40  
41  
42  
43  
44  
45  
46  
47  
48  
49

**TABLE 5: Sensitivity analysis of randomised controlled trials on testosterone treatment → cardiorespiratory fitness outcomes meta-analysis**

|                                                         | <i>N</i> studies | <i>N</i> sample | SMD  | (95% confidence interval) | <i>P</i> -value for heterogeneity |
|---------------------------------------------------------|------------------|-----------------|------|---------------------------|-----------------------------------|
| Fixed effects model                                     | 5                | 136             | 0.21 | (-0.13, 0.56)             | 0.379                             |
| Exclusion of one lower quality study (score <5.0)       | 4                | 120             | 0.13 | (-0.27, 0.54)             | 0.315                             |
| Exclusion of two placebo only control studies           | 3                | 56              | 0.03 | (-0.60, 0.66)             | 0.269                             |
| Exclusion of one study in men and women                 | 4                | 120             | 0.13 | (-0.27, 0.54)             | 0.315                             |
| Exclusion of two longer duration study (≥ 12 weeks)     | 3                | 103             | 0.27 | (-0.12, 0.67)             | 0.553                             |
| Model using peak workload rather than peak VO2 outcomes | 5                | 241             | 0.27 | (0.01, 0.52)              | 0.741                             |
| Model using 6MWT rather than peak VO2 outcomes          | 4                | 184             | 0.10 | (-0.34, 0.53)             | 0.210                             |

Abbreviations: N, number; SMD, standardised mean difference



## APPENDIX

### PubMed search syntax

(Gonadal Steroid Hormones[mh] OR Sex Steroid\*[tw] OR Sex Hormone\*[tw] OR Steroid Hormone\*[tw] OR Gonadal Steroid\*[tw] OR Androgens[mh] OR Testosterone[tw]) AND (Pulmonary Emphysema[mh] OR Emphysema\*[tw] OR Pulmonary Disease, Chronic Obstructive[mh] OR COPD[tw] OR Chronic Obstructive Pulmonary Disease[tw] OR COAD[tw] OR Chronic Obstructive Airway Disease[tw] OR Chronic Obstructive Lung Disease[tw] OR Airflow Obstruction\*[tw] OR Lung Diseases, Obstructive[mh] OR Obstructive Lung[tw] OR Obstructive Pulmonary[tw] OR Bronchitis[mh] OR Bronchitis[tw]) NOT (Asthma[mh] OR Asthma\*[tw])

### Scopus search syntax

((TITLE-ABS-KEY(steroid hormone\*) OR TITLE-ABS-KEY(sex steroid\*) OR TITLE-ABS-KEY(sex hormone\*) OR TITLE-ABS-KEY(steroid hormone\*) OR TITLE-ABS-KEY(androgen\*) OR TITLE-ABS-KEY(testosterone)) AND (TITLE-ABS-KEY(pulmonary emphysema) OR TITLE-ABS-KEY(emphysema\*) OR TITLE-ABS-KEY(pulmonary disease, chronic obstructive) OR TITLE-ABS-KEY(copd) OR TITLE-ABS-KEY(chronic obstructive pulmonary disease) OR TITLE-ABS-KEY(coad) OR TITLE-ABS-KEY(chronic obstructive airway disease) OR TITLE-ABS-KEY(chronic obstructive lung disease) OR TITLE-ABS-KEY(airflow obstruction\*) OR TITLE-ABS-KEY(lung diseases, obstructive) OR TITLE-ABS-KEY(obstructivelung) OR TITLE-ABS-KEY(obstructive pulmonary) OR TITLE-ABS-KEY(bronchitis))) AND NOT (TITLE-ABS-KEY(asthma))

**Cochrane Library search syntax**

Hits Edit Delete #1 (Gonadal Steroid Hormones[mh] OR Sex Steroid\*[tw] OR Sex Hormone\*[tw] OR Steroid Hormone\*[tw] OR Gonadal Steroid\*[tw] OR Androgens[mh] OR Testosterone[tw]) AND (Pulmonary Emphysema[mh] OR Emphysema\*[tw] OR Pulmonary Disease, Chronic Obstructive[mh] OR COPD[tw] OR Chronic Obstructive Pulmonary Disease[tw] OR COAD[tw] OR Chronic Obstructive Airway Disease[tw] OR Chronic Obstructive Lung Disease[tw] OR Airflow Obstruction\*[tw] OR Lung Diseases, Obstructive[mh] OR Obstructive Lung[tw] OR Obstructive Pulmonary[tw] OR Bronchitis[mh] OR Bronchitis[tw]) NOT (Asthma[mh] OR Asthma\*[tw]):ti,ab,kw

Quality item checklist for observational studies reviewed (each worth 1 numerical point)

| Study identification   | COPD assessment adequate? | Testosterone assay adequate? | Generalizability? (study population representative of clinical setting or community) | Covariate considerations adequate? (each worth 0.2 points): (1) age, (2) socio-economic or partner status, (3) central or general obesity, (4) smoking status, (5) alcohol intake, (6) physical activity, (7) depression or anxiety (or medications), (8) metabolic syndrome or cardiovascular disease (or medications), (9) systemic inflammation (or glucocorticoids), (10) sleep apnoea (or treatments) | Total quality score (out of 5) |
|------------------------|---------------------------|------------------------------|--------------------------------------------------------------------------------------|------------------------------------------------------------------------------------------------------------------------------------------------------------------------------------------------------------------------------------------------------------------------------------------------------------------------------------------------------------------------------------------------------------|--------------------------------|
| Bratel et al, 2000     | 0                         | 1                            | 0                                                                                    | 0.2                                                                                                                                                                                                                                                                                                                                                                                                        | 1.2                            |
| Gow et al, 1987        | 1.0                       | 1.0                          | 0.5                                                                                  | 0.4                                                                                                                                                                                                                                                                                                                                                                                                        | 2.9                            |
| Iqbal et al, 1999      | 1.0                       | 1.0                          | 1.0                                                                                  | 1.0                                                                                                                                                                                                                                                                                                                                                                                                        | 4.0                            |
| Hsu et al, 2006        | 1.0                       | 1.0                          | 0.5                                                                                  | 0.4                                                                                                                                                                                                                                                                                                                                                                                                        | 2.9                            |
| Kaparianos et al, 2011 | 1.0                       | 1.0                          | 0.5                                                                                  | 1.0                                                                                                                                                                                                                                                                                                                                                                                                        | 3.5                            |
| Karadag et al, 2007    | 1.0                       | 1.0                          | 0.0                                                                                  | 1.0                                                                                                                                                                                                                                                                                                                                                                                                        | 3.0                            |
| Semple et al, 1981     | 1.0                       | 1.0                          | 0.5                                                                                  | 0.2                                                                                                                                                                                                                                                                                                                                                                                                        | 2.7                            |
| Svartberg et al, 2007  | 1.0                       | 1.0                          | 1.0                                                                                  | 0.6                                                                                                                                                                                                                                                                                                                                                                                                        | 3.6                            |
| Van Vliet et al, 2005  | 1.0                       | 1.0                          | 0.5                                                                                  | 0.4                                                                                                                                                                                                                                                                                                                                                                                                        | 2.9                            |

For peer review only

1  
2  
3  
4  
5  
6  
7  
8  
9  
10  
11  
12  
13  
14  
15  
16  
17  
18  
19  
20  
21  
22  
23  
24  
25  
26  
27  
28  
29  
30  
31  
32  
33  
34  
35  
36  
37  
38  
39  
40  
41  
42  
43  
44  
45  
46  
47

For peer review only

**Quality item checklist for randomised controlled trials reviewed (each worth 1 numerical point)**

| Study identification   | Description of eligibility criteria adequate? | Randomization adequate? (each worth 0.5 points): (1) evidence suggesting "random" allocation; (2) evidence suggesting method used to generate random allocation sequence | Allocation concealment adequate? | Between-group prognostic indicators balanced? (each worth 0.5 points): (1) COPD severity; (2) total testosterone level | Care providers blinded? | Between-group drop-outs balanced? | Intention to treat analysis included? | Adverse events reported? | Total quality score (out of 8) |
|------------------------|-----------------------------------------------|--------------------------------------------------------------------------------------------------------------------------------------------------------------------------|----------------------------------|------------------------------------------------------------------------------------------------------------------------|-------------------------|-----------------------------------|---------------------------------------|--------------------------|--------------------------------|
| Casaburi et al, 2004   | 1.0                                           | 0.5                                                                                                                                                                      | 0.0                              | 0.5                                                                                                                    | 1.0                     | 1.0                               | 0.0                                   | 1.0                      | 5.0                            |
| Creutzberg et al, 2003 | 1.0                                           | 1.0                                                                                                                                                                      | 1.0                              | 1.0                                                                                                                    | 1.0                     | 0.0                               | 0.0                                   | 1.0                      | 6.0                            |
| Ferreira et al, 1998   | 1.0                                           | 0.5                                                                                                                                                                      | 0.0                              | 1.0                                                                                                                    | 1.0                     | 1.0                               | 0.0                                   | 1.0                      | 5.0                            |
| Pison et al, 2011      | 1.0                                           | 1.0                                                                                                                                                                      | 1.0                              | 1.0                                                                                                                    | 0.0                     | 0.0                               | 0.0                                   | 1.0                      | 5.0                            |
| Sharma et al, 2008     | 1.0                                           | 0.5                                                                                                                                                                      | 0.0                              | 0.0                                                                                                                    | 1.0                     | 1.0                               | 0.0                                   | 1.0                      | 4.5                            |
| Svartberg et al, 2004  | 1.0                                           | 0.5                                                                                                                                                                      | 0.0                              | 1.0                                                                                                                    | 1.0                     | 1.0                               | 0.0                                   | 1.0                      | 5.5                            |

**EXCLUDED CITATIONS**

- 1 Banks WA, Cooper JA. Hypoxia and hypercarbia of chronic lung disease: minimal effects on anterior pituitary function. *South Med J* 1990; 83:290-293
- 2 Bratel T, Wennlund A, Carlström K. Pituitary reactivity, androgens and catecholamines in obstructive sleep apnoea. Effects of continuous positive airway pressure treatment (CPAP). *Respiratory medicine* 1999; 93:1-7
- 3 Casaburi R, Cosentino G, Bhasin S, et al. A randomised trial of strength training and testosterone supplementation in men with chronic obstructive pulmonary disease. *European Respiratory Journal*, 2001; 173s
- 4 Chavoshan B, Fournier M, Lewis MI, et al. Testosterone and resistance training effects on muscle nitric oxide synthase isoforms in COPD men. *Respir Med* 2012; 106:269-275
- 5 Collins EG, Halabi S, Langston M, et al. Sexual dysfunction in men with COPD: impact on quality of life and survival. *Lung* 2012; 190:545-556
- 6 D'A.Semple P, Beastall GH, Watson WS, et al. Hypothalamic-pituitary dysfunction in respiratory hypoxia. *Thorax* 1981; 36:605-609
- 7 Debigare R, Marquis K, Cote CH, et al. Catabolic/anabolic balance and muscle wasting in patients with COPD. *Chest* 2003; 124:83-89
- 8 Fletcher EC, Martin RJ. Sexual dysfunction and erectile impotence in chronic obstructive pulmonary disease. *Chest* 1982; 81:413-421
- 9 Kamischke A, Kemper DE, Castel MA, et al. Testosterone levels in men with chronic obstructive pulmonary disease with or without glucocorticoid therapy. *European Respiratory Journal* 1998; 11:41-45

- 1  
2  
3  
4 10 Karadag F, Ozcan H, Karul AB, et al. Sex hormone alterations and systemic  
5 inflammation in chronic obstructive pulmonary disease. *Int J Clin Pract* 2009; 63:275-  
6 281  
7  
8  
9  
10  
11 11 Koehler F, Doehner W, Hoernig S, et al. Anorexia in chronic obstructive pulmonary  
12 disease - Association to cachexia and hormonal derangement. *International Journal of*  
13 *Cardiology* 2007; 119:83-89  
14  
15  
16  
17 12 Korneiko AG, Sivachenko TP, Mechev DS, et al. [Concentration of sex hormones in  
18 chronic bronchitis in men]. *Vrach Delo* 1989:38-39  
19  
20  
21  
22 13 Laghi F, Antonescu-Turcu A, Collins E, et al. Hypogonadism in men with chronic  
23 obstructive pulmonary disease: prevalence and quality of life. *Am J Respir Crit Care*  
24 *Med* 2005; 171:728-733  
25  
26  
27  
28  
29 14 Lewis MI, Fournier M, Storer TW, et al. Skeletal muscle adaptations to testosterone  
30 and resistance training in men with COPD. *Journal of applied physiology* (Bethesda,  
31 Md. : 1985), 2007; 1299-1310  
32  
33  
34  
35  
36 15 MacAdams MR, White RH, Chipps BE. Reduction of serum testosterone levels  
37 during chronic glucocorticoid therapy. *Ann Intern Med* 1986; 104:648-651  
38  
39  
40  
41 16 Makarevich AE. Disorders of sex hormone status in patients with chronic obstructive  
42 pulmonary disease. *Wiad Lek* 2003; 56:140-146  
43  
44  
45  
46 17 Marmorston J, Weiner JM, Hopkins CE, et al. Abnormalities in urinary hormone  
47 patterns in lung cancer and emphysema. *Cancer* 1966; 19:985-995  
48  
49  
50  
51 18 Morrison D, Capewell S, Reynolds SP, et al. Testosterone levels during systemic and  
52 inhaled corticosteroid therapy. *Respir Med* 1994; 88:659-663  
53  
54  
55  
56 19 Mulligan T, Frick MF, Zuraw QC, et al. Prevalence of hypogonadism in males aged at  
57 least 45 years: the HIM study. *International Journal of Clinical Practice* 2006; 60:762-  
58 769  
59  
60

- 1  
2  
3  
4 20 Newton D, Bone I, Barrow SM, et al. Pituitary suppression in chronic airways  
5 disease? *British Medical Journal* 1979; 2:52  
6  
7  
8 21 Praet JP, Peretz A, Rozenberg S, et al. Risk of osteoporosis in men with chronic  
9 bronchitis. *Osteoporos Int* 1992; 2:257-261  
10  
11  
12 22 Ravaglia G, Forti P, Maioli F, et al. Dehydroepiandrosterone-sulfate serum levels and  
13 common age-related diseases: results from a cross-sectional Italian study of a general  
14 elderly population. *Exp Gerontol* 2002; 37:701-712  
15  
16  
17  
18 23 Rhee YK, Kim JH, Lee HB, et al. Erectile dysfunction in patients with chronic  
19 obstructive pulmonary disease. *Tuberculosis and Respiratory Diseases* 2003; 54:304-  
20 310  
21  
22  
23  
24 24 Schols AM, Slangen J, Volovics L, et al. Weight loss is a reversible factor in the  
25 prognosis of chronic obstructive pulmonary disease. *American journal of respiratory  
26 and critical care medicine*, 1998; 179:1791-1797  
27  
28  
29  
30 25 Schols AM, Soeters PB, Mostert R, et al. Physiologic effects of nutritional support  
31 and anabolic steroids in patients with chronic obstructive pulmonary disease. A  
32 placebo-controlled randomized trial. *Am J Respir Crit Care Med* 1995; 152:1268-  
33 1274  
34  
35  
36  
37 26 Seftel A. Testosterone Treatment Improves Body Composition and Sexual Function  
38 in Men With COPD, in a 6-Month Randomized Controlled Trial. *J Urol* 2005;  
39 173:1278  
40  
41  
42  
43  
44 27 Semple D'A P, Beastall GH, Watson WS, et al. Serum testosterone depression  
45 associated with hypoxia in respiratory failure. *Clinical Science* 1980; 58:105-106  
46  
47  
48  
49 28 Semple d'A P, Watson WS, Beastall GH. Diet, absorption, and hormone studies in  
50 relation to body weight in obstructive airways disease. *Thorax* 1979; 34:783-788  
51  
52  
53  
54  
55  
56  
57  
58  
59  
60

Figure 1 presents flowchart summarising identification of studies included for review.

For peer review only

1  
2  
3  
4  
5  
6  
7  
8  
9  
10  
11  
12  
13  
14  
15  
16  
17  
18  
19  
20  
21  
22  
23  
24  
25  
26  
27  
28  
29  
30  
31  
32  
33  
34  
35  
36  
37  
38  
39  
40  
41  
42  
43  
44  
45  
46  
47  
48  
49  
50  
51  
52  
53  
54  
55  
56  
57  
58  
59  
60



1  
2  
3  
4 Figure 2 presents the WMD in endogenous TT level between the case and control groups for  
5  
6 observational studies.  
7  
8  
9  
10  
11  
12  
13  
14  
15  
16  
17  
18  
19  
20  
21  
22  
23  
24  
25  
26  
27  
28  
29  
30  
31  
32  
33  
34  
35  
36  
37  
38  
39  
40  
41  
42  
43  
44  
45  
46  
47  
48  
49  
50  
51  
52  
53  
54  
55  
56  
57  
58  
59  
60

For peer review only

1  
2  
3 Figure 3 presents a funnel plot assessing symmetry of the WMD in TT level between the case  
4 and control groups for observational studies.  
5  
6  
7  
8  
9  
10  
11  
12  
13  
14  
15  
16  
17  
18  
19  
20  
21  
22  
23  
24  
25  
26  
27  
28  
29  
30  
31  
32  
33  
34  
35  
36  
37  
38  
39  
40  
41  
42  
43  
44  
45  
46  
47  
48  
49  
50  
51  
52  
53  
54  
55  
56  
57  
58  
59  
60

For peer review only

1  
2  
3 Figure 4 presents the SMD in peak muscle strength outcomes after testosterone therapy  
4  
5  
6 between the treatment and control groups for RCTs.  
7  
8  
9  
10  
11  
12  
13  
14  
15  
16  
17  
18  
19  
20  
21  
22  
23  
24  
25  
26  
27  
28  
29  
30  
31  
32  
33  
34  
35  
36  
37  
38  
39  
40  
41  
42  
43  
44  
45  
46  
47  
48  
49  
50  
51  
52  
53  
54  
55  
56  
57  
58  
59  
60

For peer review only

1  
2  
3 Figure 5 presents a funnel plot assessing symmetry of the SMD in peak muscle strength  
4  
5  
6 outcomes after testosterone treatment between the treatment and control groups for RCTs.  
7  
8  
9  
10  
11  
12  
13  
14  
15  
16  
17  
18  
19  
20  
21  
22  
23  
24  
25  
26  
27  
28  
29  
30  
31  
32  
33  
34  
35  
36  
37  
38  
39  
40  
41  
42  
43  
44  
45  
46  
47  
48  
49  
50  
51  
52  
53  
54  
55  
56  
57  
58  
59  
60

For peer review only

1  
2  
3  
4 Figure 6 presents the SMD in peak VO2 outcomes after testosterone therapy between the  
5  
6 treatment and control groups for RCTs.  
7  
8  
9  
10  
11  
12  
13  
14  
15  
16  
17  
18  
19  
20  
21  
22  
23  
24  
25  
26  
27  
28  
29  
30  
31  
32  
33  
34  
35  
36  
37  
38  
39  
40  
41  
42  
43  
44  
45  
46  
47  
48  
49  
50  
51  
52  
53  
54  
55  
56  
57  
58  
59  
60

For peer review only

1  
2  
3 Figure 7 presents the SMD in peak HRQoL outcomes after testosterone therapy between the  
4 treatment and control groups for RCTs  
5  
6  
7  
8  
9  
10  
11  
12  
13  
14  
15  
16  
17  
18  
19  
20  
21  
22  
23  
24  
25  
26  
27  
28  
29  
30  
31  
32  
33  
34  
35  
36  
37  
38  
39  
40  
41  
42  
43  
44  
45  
46  
47  
48  
49  
50  
51  
52  
53  
54  
55  
56  
57  
58  
59  
60

For peer review only

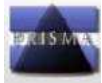

# PRISMA 2009 Checklist

| Section/topic                      | #  | Checklist item                                                                                                                                                                                                                                                                                              | Reported on page # |
|------------------------------------|----|-------------------------------------------------------------------------------------------------------------------------------------------------------------------------------------------------------------------------------------------------------------------------------------------------------------|--------------------|
| <b>TITLE</b>                       |    |                                                                                                                                                                                                                                                                                                             |                    |
| Title                              | 1  | Identify the report as a systematic review, meta-analysis, or both.                                                                                                                                                                                                                                         | 1                  |
| <b>ABSTRACT</b>                    |    |                                                                                                                                                                                                                                                                                                             |                    |
| Structured summary                 | 2  | Provide a structured summary including, as applicable: background; objectives; data sources; study eligibility criteria, participants, and interventions; study appraisal and synthesis methods; results; limitations; conclusions and implications of key findings; systematic review registration number. | 3, 4               |
| <b>INTRODUCTION</b>                |    |                                                                                                                                                                                                                                                                                                             |                    |
| Rationale                          | 3  | Describe the rationale for the review in the context of what is already known.                                                                                                                                                                                                                              | 5, 6               |
| Objectives                         | 4  | Provide an explicit statement of questions being addressed with reference to participants, interventions, comparisons, outcomes, and study design (PICOS).                                                                                                                                                  | 6                  |
| <b>METHODS</b>                     |    |                                                                                                                                                                                                                                                                                                             |                    |
| Protocol and registration          | 5  | Indicate if a review protocol exists, if and where it can be accessed (e.g., Web address), and, if available, provide registration information including registration number.                                                                                                                               | No                 |
| Eligibility criteria               | 6  | Specify study characteristics (e.g., PICOS, length of follow-up) and report characteristics (e.g., years considered, language, publication status) used as criteria for eligibility, giving rationale.                                                                                                      | 6, 7               |
| Information sources                | 7  | Describe all information sources (e.g., databases with dates of coverage, contact with study authors to identify additional studies) in the search and date last searched.                                                                                                                                  | 6                  |
| Search                             | 8  | Present full electronic search strategy for at least one database, including any limits used, such that it could be repeated.                                                                                                                                                                               | 40, 41             |
| Study selection                    | 9  | State the process for selecting studies (i.e., screening, eligibility, included in systematic review, and, if applicable, included in the meta-analysis).                                                                                                                                                   | 6                  |
| Data collection process            | 10 | Describe method of data extraction from reports (e.g., piloted forms, independently, in duplicate) and any processes for obtaining and confirming data from investigators.                                                                                                                                  | 7, 9               |
| Data items                         | 11 | List and define all variables for which data were sought (e.g., PICOS, funding sources) and any assumptions and simplifications made.                                                                                                                                                                       | 8, 9               |
| Risk of bias in individual studies | 12 | Describe methods used for assessing risk of bias of individual studies (including specification of whether this was done at the study or outcome level), and how this information is to be used in any data synthesis.                                                                                      | 7, 8, 9, 10        |
| Summary measures                   | 13 | State the principal summary measures (e.g., risk ratio, difference in means).                                                                                                                                                                                                                               | 9, 10              |
| Synthesis of results               | 14 | Describe the methods of handling data and combining results of studies, if done, including measures of consistency (e.g., $I^2$ for each meta-analysis)                                                                                                                                                     | 9, 10              |

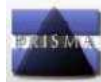

# PRISMA 2009 Checklist

Page 1 of 2

| Section/topic                 | #  | Checklist item                                                                                                                                                                                           | Reported on page # |
|-------------------------------|----|----------------------------------------------------------------------------------------------------------------------------------------------------------------------------------------------------------|--------------------|
| Risk of bias across studies   | 15 | Specify any assessment of risk of bias that may affect the cumulative evidence (e.g., publication bias, selective reporting within studies).                                                             | 7, 8               |
| Additional analyses           | 16 | Describe methods of additional analyses (e.g., sensitivity or subgroup analyses, meta-regression), if done, indicating which were pre-specified.                                                         | 10                 |
| <b>RESULTS</b>                |    |                                                                                                                                                                                                          |                    |
| Study selection               | 17 | Give numbers of studies screened, assessed for eligibility, and included in the review, with reasons for exclusions at each stage, ideally with a flow diagram.                                          | 33                 |
| Study characteristics         | 18 | For each study, present characteristics for which data were extracted (e.g., study size, PICOS, follow-up period) and provide the citations.                                                             | 26 to 29           |
| Risk of bias within studies   | 19 | Present data on risk of bias of each study and, if available, any outcome level assessment (see item 12).                                                                                                | 42, 43             |
| Results of individual studies | 20 | For all outcomes considered (benefits or harms), present, for each study: (a) simple summary data for each intervention group (b) effect estimates and confidence intervals, ideally with a forest plot. | 34, 36, 38, 39     |
| Synthesis of results          | 21 | Present results of each meta-analysis done, including confidence intervals and measures of consistency.                                                                                                  | 34, 36, 38, 39     |
| Risk of bias across studies   | 22 | Present results of any assessment of risk of bias across studies (see Item 15).                                                                                                                          | 35, 37             |
| Additional analysis           | 23 | Give results of additional analyses, if done (e.g., sensitivity or subgroup analyses, meta-regression [see Item 16]).                                                                                    | 30 to 32           |
| <b>DISCUSSION</b>             |    |                                                                                                                                                                                                          |                    |
| Summary of evidence           | 24 | Summarize the main findings including the strength of evidence for each main outcome; consider their relevance to key groups (e.g., healthcare providers, users, and policy makers).                     | 15 to 16           |
| Limitations                   | 25 | Discuss limitations at study and outcome level (e.g., risk of bias), and at review-level (e.g., incomplete retrieval of identified research, reporting bias).                                            | 16 to 17           |
| Conclusions                   | 26 | Provide a general interpretation of the results in the context of other evidence, and implications for future research.                                                                                  | 17 to 18           |
| <b>FUNDING</b>                |    |                                                                                                                                                                                                          |                    |
| Funding                       | 27 | Describe sources of funding for the systematic review and other support (e.g., supply of data); role of funders for the systematic review.                                                               | 19                 |

From: Moher D, Liberati A, Tetzlaff J, Altman DG, The PRISMA Group (2009). Preferred Reporting Items for Systematic Reviews and Meta-Analyses: The PRISMA Statement. PLoS Med 6(6): e1000097. doi:10.1371/journal.pmed1000097

For more information, visit: [www.prisma-statement.org](http://www.prisma-statement.org).

For peer review only - <http://bmjopen.bmj.com/site/about/guidelines.xhtml>

Page 2 of 2



1  
2  
3  
4  
5  
6  
7  
8  
9  
10  
11  
12  
13  
14  
15  
16  
17  
18  
19  
20  
21  
22  
23  
24  
25  
26  
27  
28  
29  
30  
31  
32  
33  
34  
35  
36  
37  
38  
39  
40  
41  
42  
43  
44  
45  
46  
47  
48  
49  
50  
51  
52  
53  
54  
55  
56  
57  
58  
59  
60

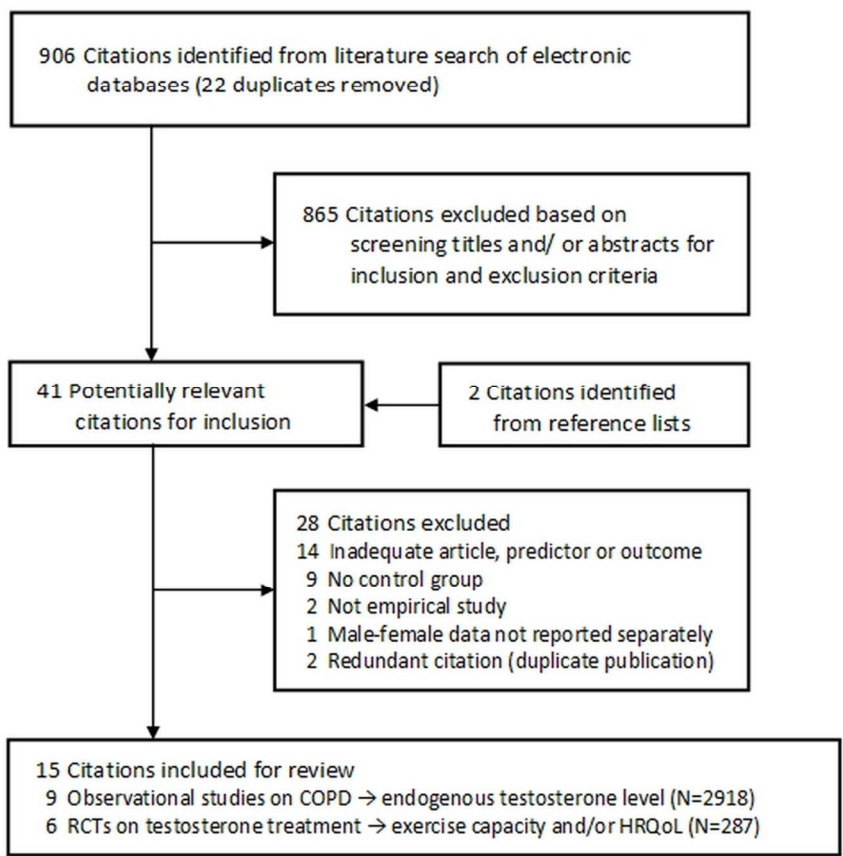

99x90mm (300 x 300 DPI)

only

1  
2  
3  
4  
5  
6  
7  
8  
9  
10  
11  
12  
13  
14  
15  
16  
17  
18  
19  
20  
21  
22  
23  
24  
25  
26  
27  
28  
29  
30  
31  
32  
33  
34  
35  
36  
37  
38  
39  
40  
41  
42  
43  
44  
45  
46  
47  
48  
49  
50  
51  
52  
53  
54  
55  
56  
57  
58  
59  
60

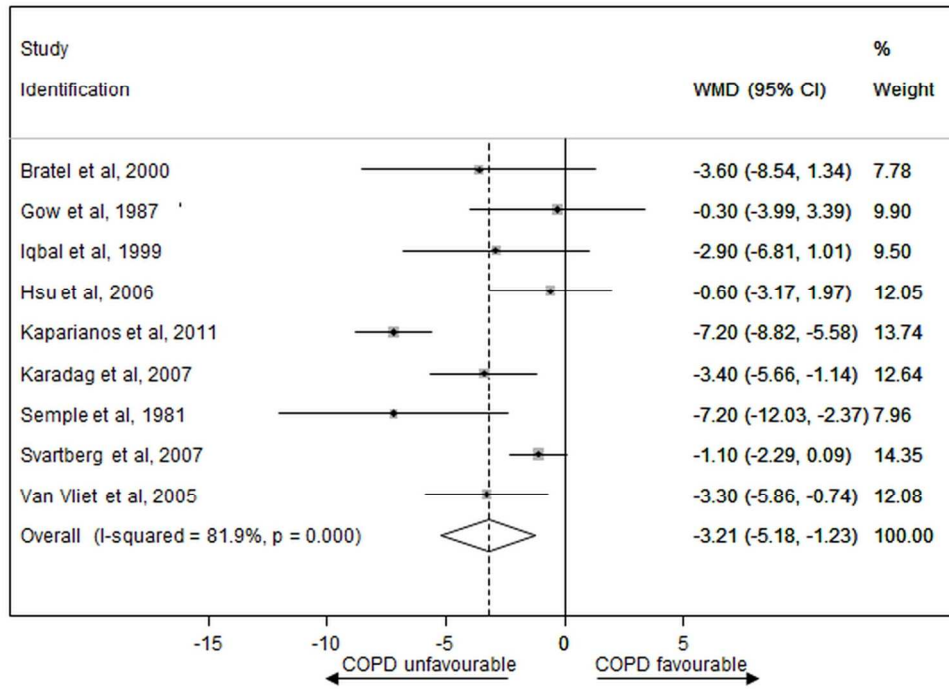

125x90mm (300 x 300 DPI)

View only

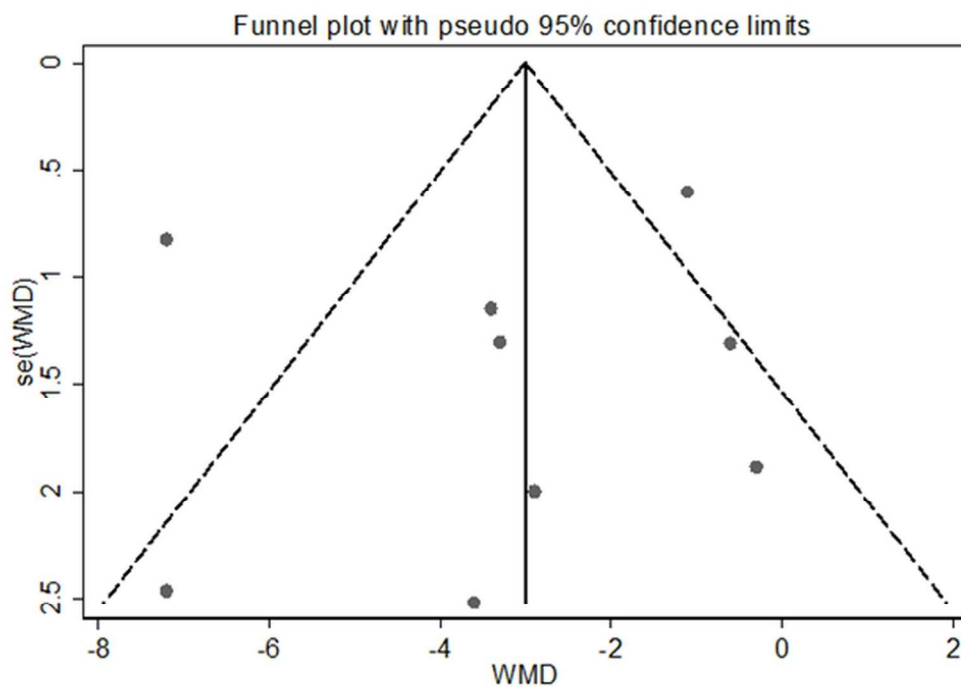

124x90mm (300 x 300 DPI)

View only

1  
2  
3  
4  
5  
6  
7  
8  
9  
10  
11  
12  
13  
14  
15  
16  
17  
18  
19  
20  
21  
22  
23  
24  
25  
26  
27  
28  
29  
30  
31  
32  
33  
34  
35  
36  
37  
38  
39  
40  
41  
42  
43  
44  
45  
46  
47  
48  
49  
50  
51  
52  
53  
54  
55  
56  
57  
58  
59  
60

1  
2  
3  
4  
5  
6  
7  
8  
9  
10  
11  
12  
13  
14  
15  
16  
17  
18  
19  
20  
21  
22  
23  
24  
25  
26  
27  
28  
29  
30  
31  
32  
33  
34  
35  
36  
37  
38  
39  
40  
41  
42  
43  
44  
45  
46  
47  
48  
49  
50  
51  
52  
53  
54  
55  
56  
57  
58  
59  
60

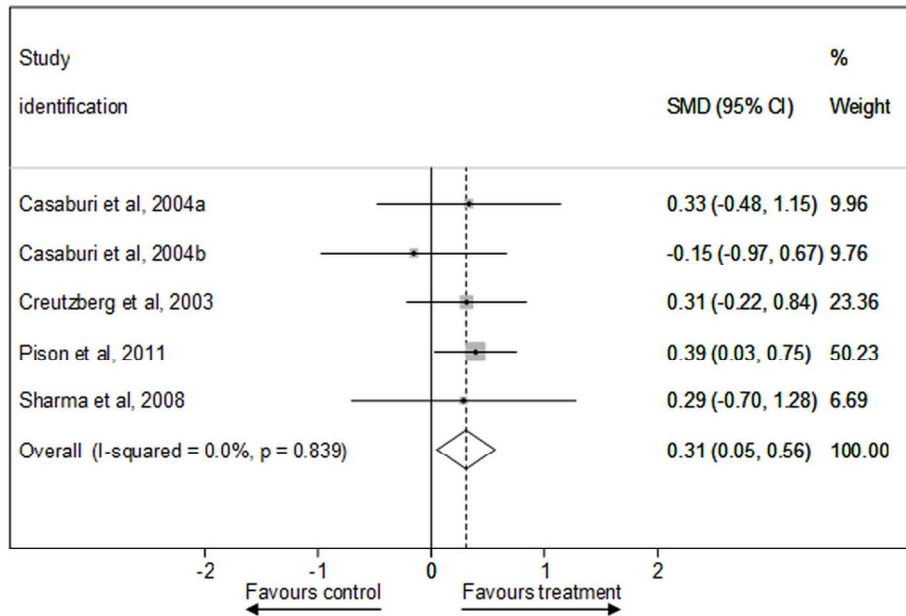

136x90mm (300 x 300 DPI)

Review only

1  
2  
3  
4  
5  
6  
7  
8  
9  
10  
11  
12  
13  
14  
15  
16  
17  
18  
19  
20  
21  
22  
23  
24  
25  
26  
27  
28  
29  
30  
31  
32  
33  
34  
35  
36  
37  
38  
39  
40  
41  
42  
43  
44  
45  
46  
47  
48  
49  
50  
51  
52  
53  
54  
55  
56  
57  
58  
59  
60

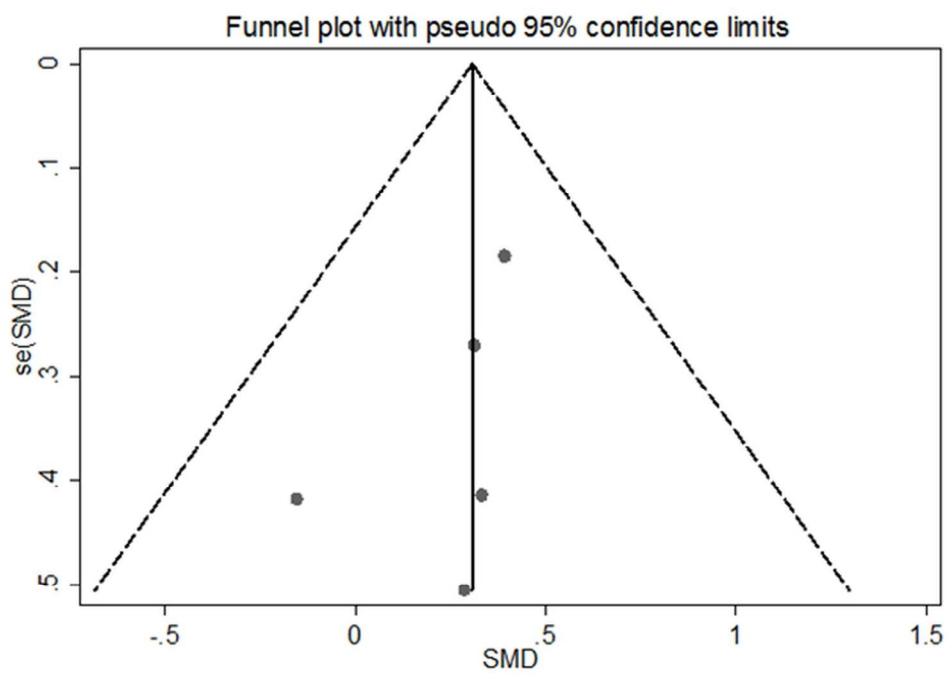

131x90mm (300 x 300 DPI)

view only

1  
2  
3  
4  
5  
6  
7  
8  
9  
10  
11  
12  
13  
14  
15  
16  
17  
18  
19  
20  
21  
22  
23  
24  
25  
26  
27  
28  
29  
30  
31  
32  
33  
34  
35  
36  
37  
38  
39  
40  
41  
42  
43  
44  
45  
46  
47  
48  
49  
50  
51  
52  
53  
54  
55  
56  
57  
58  
59  
60

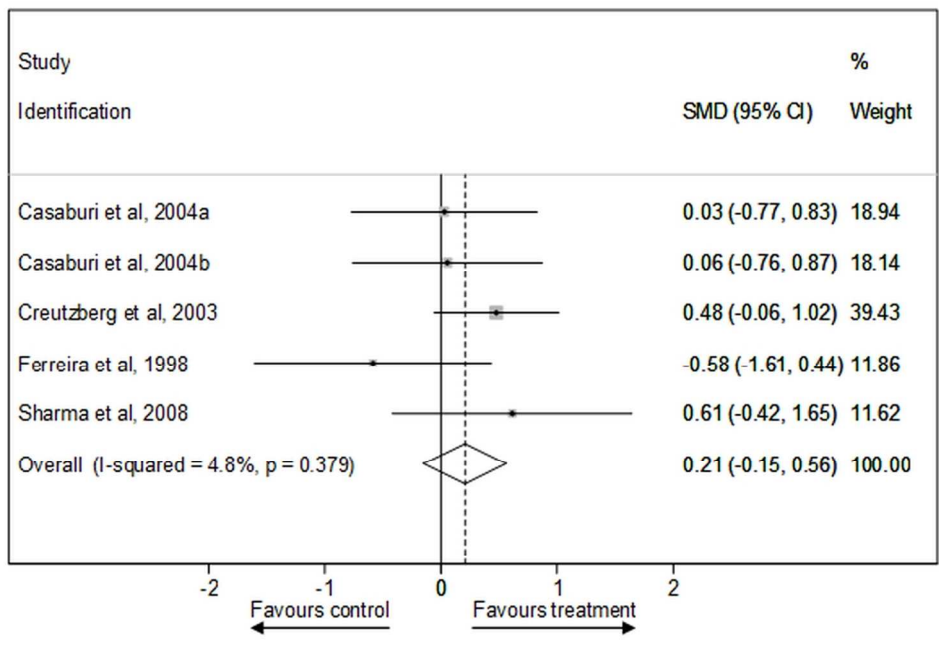

135x90mm (300 x 300 DPI)

Review only

1  
2  
3  
4  
5  
6  
7  
8  
9  
10  
11  
12  
13  
14  
15  
16  
17  
18  
19  
20  
21  
22  
23  
24  
25  
26  
27  
28  
29  
30  
31  
32  
33  
34  
35  
36  
37  
38  
39  
40  
41  
42  
43  
44  
45  
46  
47  
48  
49  
50  
51  
52  
53  
54  
55  
56  
57  
58  
59  
60

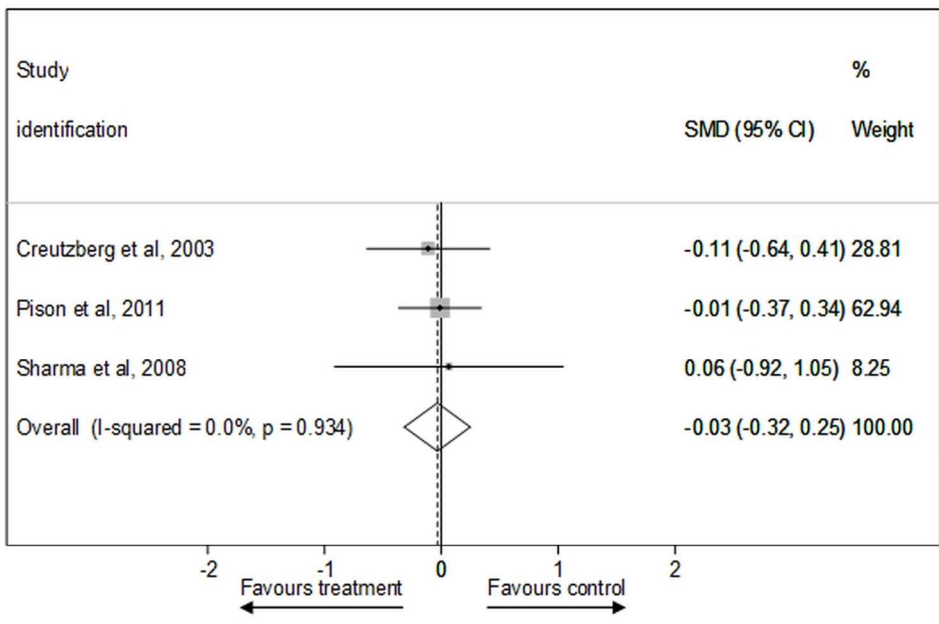

138x90mm (300 x 300 DPI)

Review only
